# Supplementary material
Source: publisher figshare collection journal article supplement (https://acs.figshare.com/ndownloader/files/25473963)
Supplement: Supplementary file 1 [file 25473963]

## Sheet: Legend
Protein FDR Confidence: High (1% False Discovery Rate), Medium (5% False Discovery Rate), or Low (>5% False Discovery Rate).
Master: If more than one protein in a group has the same score, and equal number of PSMs, and an equal number of peptides, the protein with the longest sequence is designated as the master protein.
Accession: Protein accession number (from UniProtKB).
Description: Description taken from UniProt.
Coverage (%): Percentage of the protein sequence that was covered by the peptides identified for the protein.
#Peptides: The number of peptides identified that matches to that protein, including those which were matched to multiple proteins.
#PSMs: Number of Peptide Spectrum Matches, or the number of spectra assigned to peptides that contributed to the inference of the protein.
#Unique Peptides: The number of peptides that were matched to only that protein.
MW [kDa]: Molecular weight of the protein based on the sequence from Uniprot.
Abundance: The sum of the peak intensities for each peptide identified for that protein.

## Sheet: Proteins
Protein FDR Confidence: Combined	Master	Accession	Description	Coverage [%]	# PSMs	MW [kDa]	Abundance_24	Abundance_25	Ratio_(24/25)
High	Master Protein	Q8BVY0	Ribosomal L1 domain-containing protein 1 OS=Mus musculus OX=10090 GN=Rsl1d1 PE=1 SV=1	24	8	50.4		4.12617e+06	#VALUE!
High	Master Protein	P61979	Heterogeneous nuclear ribonucleoprotein K OS=Mus musculus OX=10090 GN=Hnrnpk PE=1 SV=1	66	67	50.9		3782606	#VALUE!
High	Master Protein	Q3U422	NADH dehydrogenase [ubiquinone] flavoprotein 3, mitochondrial OS=Mus musculus OX=10090 GN=Ndufv3 PE=1 SV=1	33	7	50.5		3.62274e+06	#VALUE!
High	Master Protein	Q64524	Histone H2B type 2-E OS=Mus musculus OX=10090 GN=Hist2h2be PE=1 SV=3	41	20	14		2.50329e+06	#VALUE!
High	Master Protein	Q60972	Histone-binding protein RBBP4 OS=Mus musculus OX=10090 GN=Rbbp4 PE=1 SV=5	19	9	47.6		2.37409e+06	#VALUE!
High	Master Protein	Q58A65	C-Jun-amino-terminal kinase-interacting protein 4 OS=Mus musculus OX=10090 GN=Spag9 PE=1 SV=2	8	8	146.1		1.61667e+06	#VALUE!
High	Master Protein	Q924K8	Metastasis-associated protein MTA3 OS=Mus musculus OX=10090 GN=Mta3 PE=1 SV=1	9	6	67		1.13835e+06	#VALUE!
High	Master Protein	E9Q586	Dynactin subunit 1 OS=Mus musculus OX=10090 GN=Dctn1 PE=1 SV=1	53	111	136.8		1.05649e+06	#VALUE!
High	Master Protein	Q9JJZ2	Tubulin alpha-8 chain OS=Mus musculus OX=10090 GN=Tuba8 PE=1 SV=1	38	38	50		1.0229e+06	#VALUE!
High	Master Protein	Q60900	ELAV-like protein 3 OS=Mus musculus OX=10090 GN=Elavl3 PE=1 SV=1	18	10	39.5		856668	#VALUE!
High	Master Protein	G3UZV6	Microtubule-associated protein (Fragment) OS=Mus musculus OX=10090 GN=Map2 PE=1 SV=1	25	10	41.7		764302	#VALUE!
High	Master Protein	E9PVA6	ARF GTPase-activating protein GIT2 OS=Mus musculus OX=10090 GN=Git2 PE=1 SV=1	8	6	84.4		756370	#VALUE!
High	Master Protein	A0A286YDH6	Calcium-dependent secretion activator 1 OS=Mus musculus OX=10090 GN=Cadps PE=1 SV=1	16	11	97.1		610422	#VALUE!
High	Master Protein	Q9ESZ8	General transcription factor II-I OS=Mus musculus OX=10090 GN=Gtf2i PE=1 SV=3	25	20	112.2		567103	#VALUE!
High	Master Protein	Q9QWT9	Kinesin-like protein KIFC1 OS=Mus musculus OX=10090 GN=Kifc1 PE=1 SV=2	18	12	74.1		519934	#VALUE!
High	Master Protein	A0A0R4J1L4	AP-1 complex subunit mu-2 OS=Mus musculus OX=10090 GN=Ap1m2 PE=1 SV=1	18	6	48.2		517000	#VALUE!
High	Master Protein	B1AR17	Chromodomain helicase DNA-binding protein 3 OS=Mus musculus OX=10090 GN=Chd3 PE=1 SV=1	4	10	232.6		431748	#VALUE!
High	Master Protein	E9PVY8	Microtubule-actin cross-linking factor 1 OS=Mus musculus OX=10090 GN=Macf1 PE=1 SV=2	1	6	831.4		425406	#VALUE!
High	Master Protein	E9PUD2	Dynamin-1-like protein OS=Mus musculus OX=10090 GN=Dnm1l PE=1 SV=1	34	24	79.5		389200	#VALUE!
High	Master Protein	Q9QXY6	EH domain-containing protein 3 OS=Mus musculus OX=10090 GN=Ehd3 PE=1 SV=2	15	7	60.8		333803	#VALUE!
High	Master Protein	F8WHB1	Calcium-transporting ATPase OS=Mus musculus OX=10090 GN=Atp2b2 PE=1 SV=1	5	8	136.7		318638	#VALUE!
High	Master Protein	Q62095	ATP-dependent RNA helicase DDX3Y OS=Mus musculus OX=10090 GN=Ddx3y PE=1 SV=2	44	75	73.4		222443	#VALUE!
High	Master Protein	A0A1Y7VNZ6	Non-specific serine/threonine protein kinase OS=Mus musculus OX=10090 GN=Mark3 PE=1 SV=1	9	7	88.8		47597.9	#VALUE!
High	Master Protein	Q9Z0R9	Fatty acid desaturase 2 OS=Mus musculus OX=10090 GN=Fads2 PE=1 SV=1	11	4	52.4		5.35542e+06	#VALUE!
High	Master Protein	Q920A5	Retinoid-inducible serine carboxypeptidase OS=Mus musculus OX=10090 GN=Scpep1 PE=1 SV=2	8	3	50.9		4.1604e+06	#VALUE!
High	Master Protein	P62911	60S ribosomal protein L32 OS=Mus musculus OX=10090 GN=Rpl32 PE=1 SV=2	21	5	15.9		3.56087e+06	#VALUE!
High	Master Protein	Q9CQ73	Plakophilin 2 OS=Mus musculus OX=10090 GN=Pkp2 PE=1 SV=1	4	3	88		3125243	#VALUE!
High	Master Protein	Q3UUY6	Prominin-2 OS=Mus musculus OX=10090 GN=Prom2 PE=1 SV=1	3	2	93.1		2179641	#VALUE!
High	Master Protein	D3Z080	Sorbin and SH3 domain-containing protein 2 OS=Mus musculus OX=10090 GN=Sorbs2 PE=1 SV=1	7	5	78.1		1.96499e+06	#VALUE!
High	Master Protein	Q99MK8	Beta-adrenergic receptor kinase 1 OS=Mus musculus OX=10090 GN=Grk2 PE=1 SV=2	4	2	79.6		1.8342e+06	#VALUE!
High	Master Protein	Q8BZR9	Nuclear cap-binding protein subunit 3 OS=Mus musculus OX=10090 GN=Ncbp3 PE=1 SV=1	9	4	70		1.75343e+06	#VALUE!
High	Master Protein	Q9D903	Probable rRNA-processing protein EBP2 OS=Mus musculus OX=10090 GN=Ebna1bp2 PE=2 SV=1	11	3	34.7		1.74944e+06	#VALUE!
High	Master Protein	Q6R891	Neurabin-2 OS=Mus musculus OX=10090 GN=Ppp1r9b PE=1 SV=1	8	5	89.5		1.71295e+06	#VALUE!
High	Master Protein	Q9QZE7	Translin-associated protein X OS=Mus musculus OX=10090 GN=Tsnax PE=1 SV=1	14	2	32.9		1.69262e+06	#VALUE!
High	Master Protein	Q9D0F1	Kinetochore protein NDC80 homolog OS=Mus musculus OX=10090 GN=Ndc80 PE=1 SV=1	3	2	73.9		1.53692e+06	#VALUE!
High	Master Protein	Q3TJZ6	Protein FAM98A OS=Mus musculus OX=10090 GN=Fam98a PE=1 SV=1	6	2	55		1.43491e+06	#VALUE!
High	Master Protein	Q9DC51	Guanine nucleotide-binding protein G(k) subunit alpha OS=Mus musculus OX=10090 GN=Gnai3 PE=1 SV=3	11	4	40.5		1.30123e+06	#VALUE!
High	Master Protein	E9QK83	Small subunit processome component 20 homolog OS=Mus musculus OX=10090 GN=Utp20 PE=1 SV=1	2	4	317.7		1.29513e+06	#VALUE!
High	Master Protein	A0A140T8S5	Chromosome alignment-maintaining phosphoprotein 1 OS=Mus musculus OX=10090 GN=Champ1 PE=1 SV=2	7	4	87.5		1.25979e+06	#VALUE!
High	Master Protein	Q924M7	Mannose-6-phosphate isomerase OS=Mus musculus OX=10090 GN=Mpi PE=1 SV=1	10	4	46.5		1.23984e+06	#VALUE!
High	Master Protein	Q9JLM4	Zinc finger MYM-type protein 3 OS=Mus musculus OX=10090 GN=Zmym3 PE=1 SV=1	2	2	152.8		1.22099e+06	#VALUE!
High	Master Protein	D3Z5N6	Zinc finger protein ubi-d4 OS=Mus musculus OX=10090 GN=Dpf2 PE=1 SV=1	17	4	45.8		1.18777e+06	#VALUE!
High	Master Protein	Q7TPM6	Fibronectin type III and SPRY domain-containing protein 1 OS=Mus musculus OX=10090 GN=Fsd1 PE=1 SV=1	11	4	55.5		1.17635e+06	#VALUE!
High	Master Protein	A0A286YDV7	Nucleolar and coiled-body phosphoprotein 1 (Fragment) OS=Mus musculus OX=10090 GN=Nolc1 PE=1 SV=1	7	5	73.6		1.15773e+06	#VALUE!
High	Master Protein	O88271	Craniofacial development protein 1 OS=Mus musculus OX=10090 GN=Cfdp1 PE=1 SV=1	13	2	32.9		1.15753e+06	#VALUE!
High	Master Protein	Q91VJ5	Polyglutamine-binding protein 1 OS=Mus musculus OX=10090 GN=Pqbp1 PE=1 SV=1	19	2	30.6		1.15256e+06	#VALUE!
High	Master Protein	Q99LG0	Ubiquitin carboxyl-terminal hydrolase 16 OS=Mus musculus OX=10090 GN=Usp16 PE=1 SV=2	5	2	93.4		1.14732e+06	#VALUE!
High	Master Protein	Q8C5Q4	G-rich sequence factor 1 OS=Mus musculus OX=10090 GN=Grsf1 PE=1 SV=2	9	2	53		1.13722e+06	#VALUE!
High	Master Protein	G3X8T2	RIKEN cDNA 5830416A07, isoform CRA_c OS=Mus musculus OX=10090 GN=Zc3h18 PE=1 SV=1	10	5	108.2		1.1364e+06	#VALUE!
High	Master Protein	Q8VE88	Protein FAM114A2 OS=Mus musculus OX=10090 GN=Fam114a2 PE=1 SV=2	6	2	54		1.11055e+06	#VALUE!
High	Master Protein	Q6ZQK5	Arf-GAP with coiled-coil, ANK repeat and PH domain-containing protein 2 OS=Mus musculus OX=10090 GN=Acap2 PE=1 SV=2	3	2	87.2		1.10208e+06	#VALUE!
High	Master Protein	Q9CXS4	Centromere protein V OS=Mus musculus OX=10090 GN=Cenpv PE=1 SV=2	21	4	27.5		1.06198e+06	#VALUE!
High	Master Protein	Q63932	Dual specificity mitogen-activated protein kinase kinase 2 OS=Mus musculus OX=10090 GN=Map2k2 PE=1 SV=2	14	3	44.4		1.03334e+06	#VALUE!
High	Master Protein	O35857	Mitochondrial import inner membrane translocase subunit TIM44 OS=Mus musculus OX=10090 GN=Timm44 PE=1 SV=2	6	2	51.1		1.00054e+06	#VALUE!
High	Master Protein	Q6PD26	GPI transamidase component PIG-S OS=Mus musculus OX=10090 GN=Pigs PE=1 SV=3	10	4	61.7		997175	#VALUE!
High	Master Protein	Q66JS6	Eukaryotic translation initiation factor 3 subunit J-B OS=Mus musculus OX=10090 GN=Eif3j2 PE=1 SV=1	9	2	29.5		946286	#VALUE!
High	Master Protein	Q9DBU6	Serine/Arginine-related protein 53 OS=Mus musculus OX=10090 GN=Rsrc1 PE=1 SV=1	11	2	38.6		928282	#VALUE!
High	Master Protein	G3X8X7	Vacuolar protein sorting 16 (Yeast) OS=Mus musculus OX=10090 GN=Vps16 PE=1 SV=1	3	2	94.8		918668	#VALUE!
High	Master Protein	Q921G8	Gamma-tubulin complex component 2 OS=Mus musculus OX=10090 GN=Tubgcp2 PE=1 SV=2	4	3	103.2		911407	#VALUE!
High	Master Protein	Q91VM9	Inorganic pyrophosphatase 2, mitochondrial OS=Mus musculus OX=10090 GN=Ppa2 PE=1 SV=1	9	2	38.1		895525	#VALUE!
High	Master Protein	Q9Z2A0	3-phosphoinositide-dependent protein kinase 1 OS=Mus musculus OX=10090 GN=Pdpk1 PE=1 SV=2	5	2	63.7		876851	#VALUE!
High	Master Protein	F8WHQ1	Tumor protein D52 OS=Mus musculus OX=10090 GN=Tpd52 PE=1 SV=1	18	3	26.9		850397	#VALUE!
High	Master Protein	P27601	Guanine nucleotide-binding protein subunit alpha-13 OS=Mus musculus OX=10090 GN=Gna13 PE=1 SV=1	14	5	44		849173	#VALUE!
High	Master Protein	Q9EPN1	Neurobeachin OS=Mus musculus OX=10090 GN=Nbea PE=1 SV=1	2	3	326.5		812738	#VALUE!
High	Master Protein	D3YU56	Inner nuclear membrane protein Man1 OS=Mus musculus OX=10090 GN=Lemd3 PE=1 SV=1	3	2	102.5		809909	#VALUE!
High	Master Protein	P99027	60S acidic ribosomal protein P2 OS=Mus musculus OX=10090 GN=Rplp2 PE=1 SV=3	39	2	11.6		783703	#VALUE!
High	Master Protein	Q80UY2	E3 ubiquitin-protein ligase KCMF1 OS=Mus musculus OX=10090 GN=Kcmf1 PE=1 SV=1	4	2	41.8		756132	#VALUE!
High	Master Protein	Q8BHB4	WD repeat-containing protein 3 OS=Mus musculus OX=10090 GN=Wdr3 PE=1 SV=1	4	4	105.7		748140	#VALUE!
High	Master Protein	F8VPL2	Phosphatidylinositol 4-phosphate 3-kinase C2 domain-containing subunit alpha OS=Mus musculus OX=10090 GN=Pik3c2a PE=1 SV=1	2	2	190.6		738881	#VALUE!
High	Master Protein	Q8C0C0	Zinc fingers and homeoboxes protein 2 OS=Mus musculus OX=10090 GN=Zhx2 PE=1 SV=1	3	2	92.2		738124	#VALUE!
High	Master Protein	F8WHT3	Protein PRRC2B OS=Mus musculus OX=10090 GN=Prrc2b PE=1 SV=1	3	4	243		732342	#VALUE!
High	Master Protein	Q06180	Tyrosine-protein phosphatase non-receptor type 2 OS=Mus musculus OX=10090 GN=Ptpn2 PE=1 SV=2	7	2	47.3		722464	#VALUE!
High	Master Protein	Q8R0X2	CDK2-associated and cullin domain-containing protein 1 OS=Mus musculus OX=10090 GN=Cacul1 PE=2 SV=1	13	4	42.1		720406	#VALUE!
High	Master Protein	Q61136	Serine/threonine-protein kinase PRP4 homolog OS=Mus musculus OX=10090 GN=Prpf4b PE=1 SV=3	3	3	116.9		701295	#VALUE!
High	Master Protein	E9Q912	RAP1, GTP-GDP dissociation stimulator 1 OS=Mus musculus OX=10090 GN=Rap1gds1 PE=1 SV=1	4	2	66		680220	#VALUE!
High	Master Protein	Q8R146	Acylamino-acid-releasing enzyme OS=Mus musculus OX=10090 GN=Apeh PE=1 SV=3	3	2	81.5		675564	#VALUE!
High	Master Protein	Q8BL66	Early endosome antigen 1 OS=Mus musculus OX=10090 GN=Eea1 PE=1 SV=2	3	3	160.8		651320	#VALUE!
High	Master Protein	P23780	Beta-galactosidase OS=Mus musculus OX=10090 GN=Glb1 PE=1 SV=1	3	3	73.1		644959	#VALUE!
High	Master Protein	Q6PB44	Tyrosine-protein phosphatase non-receptor type 23 OS=Mus musculus OX=10090 GN=Ptpn23 PE=1 SV=2	4	5	185.1		636287	#VALUE!
High	Master Protein	Q78JW9	Ubiquitin domain-containing protein UBFD1 OS=Mus musculus OX=10090 GN=Ubfd1 PE=1 SV=2	8	2	40.1		609977	#VALUE!
High	Master Protein	Q9DBS1	Transmembrane protein 43 OS=Mus musculus OX=10090 GN=Tmem43 PE=1 SV=1	14	2	44.8		608521	#VALUE!
High	Master Protein	Q99LB6	Methionine adenosyltransferase 2 subunit beta OS=Mus musculus OX=10090 GN=Mat2b PE=1 SV=1	11	2	37.4		605431	#VALUE!
High	Master Protein	P55200	Histone-lysine N-methyltransferase 2A OS=Mus musculus OX=10090 GN=Kmt2a PE=1 SV=3	1	3	429.4		598707	#VALUE!
High	Master Protein	P70279	Surfeit locus protein 6 OS=Mus musculus OX=10090 GN=Surf6 PE=1 SV=1	5	2	41.2		598503	#VALUE!
High	Master Protein	Q8CIM8	Integrator complex subunit 4 OS=Mus musculus OX=10090 GN=Ints4 PE=1 SV=1	6	3	108.1		578791	#VALUE!
High	Master Protein	Q9EQU5	Protein SET OS=Mus musculus OX=10090 GN=Set PE=1 SV=1	9	2	33.4		577762	#VALUE!
High	Master Protein	Q3UH70	Bromodomain-containing protein 4 OS=Mus musculus OX=10090 GN=Brd4 PE=1 SV=1	2	2	156		568077	#VALUE!
High	Master Protein	Q8R1N0	Zinc finger protein 830 OS=Mus musculus OX=10090 GN=Znf830 PE=1 SV=1	18	3	40.6		552295	#VALUE!
High	Master Protein	A0A0R4J1N0	Dihydropyrimidinase-related protein 4 OS=Mus musculus OX=10090 GN=Dpysl4 PE=1 SV=1	5	2	64.3		542944	#VALUE!
High	Master Protein	E9QA15	Caldesmon 1 OS=Mus musculus OX=10090 GN=Cald1 PE=1 SV=1	4	2	89.2		534091	#VALUE!
High	Master Protein	P16330	2',3'-cyclic-nucleotide 3'-phosphodiesterase OS=Mus musculus OX=10090 GN=Cnp PE=1 SV=3	6	2	47.1		532610	#VALUE!
High	Master Protein	Q8K4L4	Protein POF1B OS=Mus musculus OX=10090 GN=Pof1b PE=2 SV=3	4	2	67.7		528675	#VALUE!
High	Master Protein	H3BL37	Treacle protein OS=Mus musculus OX=10090 GN=Tcof1 PE=1 SV=1	7	5	138.5		524545	#VALUE!
High	Master Protein	F7AI87	26S proteasome non-ATPase regulatory subunit 4 (Fragment) OS=Mus musculus OX=10090 GN=Psmd4 PE=1 SV=1	21	2	21.3		520268	#VALUE!
High	Master Protein	Q9CQ13	Coordinator of PRMT5 and differentiation stimulator OS=Mus musculus OX=10090 GN=Coprs PE=1 SV=1	35	2	18.7		519574	#VALUE!
High	Master Protein	Q9Z0H1	WD repeat-containing protein 46 OS=Mus musculus OX=10090 GN=Wdr46 PE=2 SV=1	6	2	69		514845	#VALUE!
High	Master Protein	Q64324	Syntaxin-binding protein 2 OS=Mus musculus OX=10090 GN=Stxbp2 PE=1 SV=1	7	2	66.3		514761	#VALUE!
High	Master Protein	F8VQH0	Tyrosine-protein kinase OS=Mus musculus OX=10090 GN=Abl2 PE=1 SV=1	2	2	128.1		494184	#VALUE!
High	Master Protein	B1AWQ4	Espin OS=Mus musculus OX=10090 GN=Espn PE=1 SV=1	4	2	94.9		492524	#VALUE!
High	Master Protein	Q6AXD2	Abi2 protein OS=Mus musculus OX=10090 GN=Abi2 PE=1 SV=1	6	2	52.9		477534	#VALUE!
High	Master Protein	Q3UHZ7	UDP-N-acetylhexosamine pyrophosphorylase OS=Mus musculus OX=10090 GN=Uap1 PE=1 SV=1	5	3	58.5		472698	#VALUE!
High	Master Protein	Q08288	Cell growth-regulating nucleolar protein OS=Mus musculus OX=10090 GN=Lyar PE=1 SV=2	9	2	43.7		472103	#VALUE!
High	Master Protein	Q3UJD6	Ubiquitin carboxyl-terminal hydrolase 19 OS=Mus musculus OX=10090 GN=Usp19 PE=1 SV=1	4	3	150.5		471598	#VALUE!
High	Master Protein	Q14AX6	Cyclin-dependent kinase 12 OS=Mus musculus OX=10090 GN=Cdk12 PE=1 SV=2	3	4	163.6		468058	#VALUE!
High	Master Protein	Q9JM13	Rab5 GDP/GTP exchange factor OS=Mus musculus OX=10090 GN=Rabgef1 PE=1 SV=1	9	3	56.8		464752	#VALUE!
High	Master Protein	Q9WTQ5	A-kinase anchor protein 12 OS=Mus musculus OX=10090 GN=Akap12 PE=1 SV=1	6	5	180.6		462628	#VALUE!
High	Master Protein	D3Z357	Histone-lysine N-methyltransferase NSD3 OS=Mus musculus OX=10090 GN=Nsd3 PE=1 SV=1	3	2	161.5		460956	#VALUE!
High	Master Protein	Q5SS80	Dehydrogenase/reductase SDR family member 13 OS=Mus musculus OX=10090 GN=Dhrs13 PE=1 SV=1	16	3	40.7		454909	#VALUE!
High	Master Protein	A0A1D5RML8	DNA-directed RNA polymerase II subunit RPB3 OS=Mus musculus OX=10090 GN=Polr2c PE=1 SV=1	8	3	48.3		454890	#VALUE!
High	Master Protein	P24788	Cyclin-dependent kinase 11B OS=Mus musculus OX=10090 GN=Cdk11b PE=1 SV=2	3	2	91.5		451161	#VALUE!
High	Master Protein	G3X8R5	Glutamine-rich protein 1 OS=Mus musculus OX=10090 GN=Qrich1 PE=1 SV=1	3	2	86.5		442502	#VALUE!
High	Master Protein	Q8CAS9	Poly [ADP-ribose] polymerase 9 OS=Mus musculus OX=10090 GN=Parp9 PE=1 SV=2	3	2	96.6		440386	#VALUE!
High	Master Protein	Q9DBG5	Perilipin-3 OS=Mus musculus OX=10090 GN=Plin3 PE=1 SV=1	13	3	47.2		440355	#VALUE!
High	Master Protein	F8VQ93	PH-interacting protein OS=Mus musculus OX=10090 GN=Phip PE=1 SV=1	1	2	206.6		439118	#VALUE!
High	Master Protein	Q9Z0H3	SWI/SNF-related matrix-associated actin-dependent regulator of chromatin subfamily B member 1 OS=Mus musculus OX=10090 GN=Smarcb1 PE=1 SV=1	9	2	44.1		430580	#VALUE!
High	Master Protein	F6X4N5	Syntaxin-16 OS=Mus musculus OX=10090 GN=Stx16 PE=1 SV=1	7	2	37.1		428718	#VALUE!
Medium	Master Protein	Q8BL63	GPI-anchor transamidase OS=Mus musculus OX=10090 GN=Pigk PE=1 SV=1	3	2	49.8		424251	#VALUE!
High	Master Protein	A2AGQ4	MAP kinase-activating death domain protein OS=Mus musculus OX=10090 GN=Madd PE=1 SV=1	1	2	181.1		396888	#VALUE!
High	Master Protein	P41778	Pre-B-cell leukemia transcription factor 1 OS=Mus musculus OX=10090 GN=Pbx1 PE=1 SV=2	13	3	46.6		379475	#VALUE!
High	Master Protein	P03911	NADH-ubiquinone oxidoreductase chain 4 OS=Mus musculus OX=10090 GN=Mtnd4 PE=1 SV=1	8	2	51.8		376306	#VALUE!
High	Master Protein	G3X9Y5	Ubiquitin conjugation factor E4 A OS=Mus musculus OX=10090 GN=Ube4a PE=1 SV=1	3	2	124.4		359002	#VALUE!
High	Master Protein	Q8K209	Adhesion G-protein coupled receptor G1 OS=Mus musculus OX=10090 GN=Adgrg1 PE=1 SV=1	2	2	77.2		356624	#VALUE!
High	Master Protein	Q9D0D3	Poly(A) RNA polymerase, mitochondrial OS=Mus musculus OX=10090 GN=Mtpap PE=1 SV=1	7	2	65.2		338765	#VALUE!
High	Master Protein	B1AQZ2	Kinesin-like protein OS=Mus musculus OX=10090 GN=Kif3a PE=1 SV=1	5	3	82.6		336502	#VALUE!
High	Master Protein	O88456	Calpain small subunit 1 OS=Mus musculus OX=10090 GN=Capns1 PE=1 SV=1	9	2	28.4		333316	#VALUE!
High	Master Protein	Q5DTM8	E3 ubiquitin-protein ligase BRE1A OS=Mus musculus OX=10090 GN=Rnf20 PE=1 SV=2	3	2	113.5		330111	#VALUE!
High	Master Protein	G3X961	Kelch domain containing 4, isoform CRA_a OS=Mus musculus OX=10090 GN=Klhdc4 PE=1 SV=1	6	2	64.8		326833	#VALUE!
High	Master Protein	B2RQR5	Small G protein signaling modulator 1 OS=Mus musculus OX=10090 GN=Sgsm1 PE=1 SV=1	4	4	123.2		326583	#VALUE!
High	Master Protein	Q04692	SWI/SNF-related matrix-associated actin-dependent regulator of chromatin subfamily A containing DEAD/H box 1 OS=Mus musculus OX=10090 GN=Smarcad1 PE=1 SV=2	3	2	116.4		306448	#VALUE!
High	Master Protein	Q9JKB3	Y-box-binding protein 3 OS=Mus musculus OX=10090 GN=Ybx3 PE=1 SV=2	10	2	38.8		304248	#VALUE!
High	Master Protein	P19426	Negative elongation factor E OS=Mus musculus OX=10090 GN=Nelfe PE=1 SV=2	10	2	42.5		301596	#VALUE!
High	Master Protein	Q7TQE6	Macoilin OS=Mus musculus OX=10090 GN=Maco1 PE=1 SV=1	5	2	76		299123	#VALUE!
High	Master Protein	Q68FG2	Spectrin beta chain OS=Mus musculus OX=10090 GN=Sptbn2 PE=1 SV=1	3	5	270.8		271968	#VALUE!
High	Master Protein	Q8BMI0	F-box only protein 38 OS=Mus musculus OX=10090 GN=Fbxo38 PE=1 SV=1	3	3	133.8		267935	#VALUE!
High	Master Protein	Q6ZQ82	Rho GTPase-activating protein 26 OS=Mus musculus OX=10090 GN=Arhgap26 PE=1 SV=3	4	3	92		264756	#VALUE!
High	Master Protein	Q80ZV0	Ribonuclease H2 subunit B OS=Mus musculus OX=10090 GN=Rnaseh2b PE=1 SV=2	5	2	34.7		261916	#VALUE!
High	Master Protein	Q91YS8	Calcium/calmodulin-dependent protein kinase type 1 OS=Mus musculus OX=10090 GN=Camk1 PE=1 SV=1	10	2	41.6		258160	#VALUE!
High	Master Protein	D3YTT6	Oxysterol-binding protein OS=Mus musculus OX=10090 GN=Osbpl3 PE=1 SV=1	8	5	100.4		250979	#VALUE!
High	Master Protein	Q9D2M8	Ubiquitin-conjugating enzyme E2 variant 2 OS=Mus musculus OX=10090 GN=Ube2v2 PE=1 SV=4	25	4	16.4		244349	#VALUE!
High	Master Protein	A0A2C9F2C1	Synaptotagmin-7 OS=Mus musculus OX=10090 GN=Syt7 PE=1 SV=1	8	2	68.3		241137	#VALUE!
High	Master Protein	Q80ZW7	Nucleolysin TIA-1 OS=Mus musculus OX=10090 GN=Tia1 PE=1 SV=1	9	2	41.9		212909	#VALUE!
High	Master Protein	A2A4P0	ATP-dependent RNA helicase DHX8 OS=Mus musculus OX=10090 GN=Dhx8 PE=2 SV=1	2	2	142.5		195619	#VALUE!
High	Master Protein	Q6A037	NEDD4-binding protein 1 OS=Mus musculus OX=10090 GN=N4bp1 PE=1 SV=2	3	2	99.1		193140	#VALUE!
High	Master Protein	Q8R480	Nuclear pore complex protein Nup85 OS=Mus musculus OX=10090 GN=Nup85 PE=1 SV=1	5	3	74.7		187094	#VALUE!
High	Master Protein	P60469	Liprin-alpha-3 OS=Mus musculus OX=10090 GN=Ppfia3 PE=1 SV=2	5	3	133.3		176096	#VALUE!
High	Master Protein	P61027	Ras-related protein Rab-10 OS=Mus musculus OX=10090 GN=Rab10 PE=1 SV=1	17	4	22.5		156582	#VALUE!
High	Master Protein	Q9D168	Integrator complex subunit 12 OS=Mus musculus OX=10090 GN=Ints12 PE=1 SV=1	8	2	48.5		152377	#VALUE!
High	Master Protein	F6U775	Dynamin-like 120 kDa protein, mitochondrial (Fragment) OS=Mus musculus OX=10090 GN=Opa1 PE=1 SV=1	17	5	33.9		104966	#VALUE!
High	Master Protein	O35280	Serine/threonine-protein kinase Chk1 OS=Mus musculus OX=10090 GN=Chek1 PE=1 SV=2	3	2	54.3		100757	#VALUE!
High	Master Protein	Q5F2E7	Nuclear fragile X mental retardation-interacting protein 2 OS=Mus musculus OX=10090 GN=Nufip2 PE=1 SV=1	9	3	75.6		65440.9	#VALUE!
High	Master Protein	Q9EQG9	Collagen type IV alpha-3-binding protein OS=Mus musculus OX=10090 GN=Col4a3bp PE=1 SV=1	4	2	71.1		59727.5	#VALUE!
High	Master Protein	Q8BQ46	TAF15 RNA polymerase II, TATA box binding protein (TBP)-associated factor OS=Mus musculus OX=10090 GN=Taf15 PE=1 SV=1	14	4	58.6		52452.2	#VALUE!
High	Master Protein	P99024	Tubulin beta-5 chain OS=Mus musculus OX=10090 GN=Tubb5 PE=1 SV=1	86	1020	49.6	3.55088e+10	2.74264e+09	12.9469
High	Master Protein	P68372	Tubulin beta-4B chain OS=Mus musculus OX=10090 GN=Tubb4b PE=1 SV=1	86	928	49.8	1882960195	1.90175e+08	9.90119
High	Master Protein	A0A0A0MQF6	Glyceraldehyde-3-phosphate dehydrogenase OS=Mus musculus OX=10090 GN=Gapdh PE=1 SV=1	74	371	38.6	1.06804e+09	4.93582e+09	0.216385
High	Master Protein	P63017	Heat shock cognate 71 kDa protein OS=Mus musculus OX=10090 GN=Hspa8 PE=1 SV=1	79	282	70.8	1.01202e+09	3.60096e+09	0.281041
High	Master Protein	O35945	Aldehyde dehydrogenase, cytosolic 1 OS=Mus musculus OX=10090 GN=Aldh1a7 PE=1 SV=1	87	418	54.6	6.20551e+08	7.16294e+09	0.0866336
High	Master Protein	P52480	Pyruvate kinase PKM OS=Mus musculus OX=10090 GN=Pkm PE=1 SV=4	71	147	57.8	4.36677e+08	1.31933e+09	0.330983
High	Master Protein	P20029	Endoplasmic reticulum chaperone BiP OS=Mus musculus OX=10090 GN=Hspa5 PE=1 SV=3	68	158	72.4	3.92555e+08	1.35932e+09	0.288788
High	Master Protein	P58252	Elongation factor 2 OS=Mus musculus OX=10090 GN=Eef2 PE=1 SV=2	68	151	95.3	3.58439e+08	9.83997e+08	0.364268
High	Master Protein	P10126	Elongation factor 1-alpha 1 OS=Mus musculus OX=10090 GN=Eef1a1 PE=1 SV=3	65	85	50.1	3.37311e+08	1.14172e+09	0.295441
High	Master Protein	O55143	Sarcoplasmic/endoplasmic reticulum calcium ATPase 2 OS=Mus musculus OX=10090 GN=Atp2a2 PE=1 SV=2	49	124	114.8	3.23739e+08	1.58846e+08	2.03807
High	Master Protein	P07901	Heat shock protein HSP 90-alpha OS=Mus musculus OX=10090 GN=Hsp90aa1 PE=1 SV=4	64	149	84.7	2.94507e+08	1.07733e+09	0.273368
High	Master Protein	E9QPD7	Pyruvate carboxylase OS=Mus musculus OX=10090 GN=Pcx PE=1 SV=1	67	156	129.7	2.37329e+08	1.03808e+09	0.228624
High	Master Protein	P50247	Adenosylhomocysteinase OS=Mus musculus OX=10090 GN=Ahcy PE=1 SV=3	70	94	47.7	2.27018e+08	1.08319e+09	0.209584
High	Master Protein	P68369	Tubulin alpha-1A chain OS=Mus musculus OX=10090 GN=Tuba1a PE=1 SV=1	63	70	50.1	2.23443e+08	6.4229e+08	0.347886
High	Master Protein	P50516	V-type proton ATPase catalytic subunit A OS=Mus musculus OX=10090 GN=Atp6v1a PE=1 SV=2	83	136	68.3	2.15028e+08	5.18791e+08	0.41448
High	Master Protein	Q62167	ATP-dependent RNA helicase DDX3X OS=Mus musculus OX=10090 GN=Ddx3x PE=1 SV=3	54	93	73.1	2.08528e+08	5.58062e+08	0.373665
High	Master Protein	P63038	60 kDa heat shock protein, mitochondrial OS=Mus musculus OX=10090 GN=Hspd1 PE=1 SV=1	74	118	60.9	1.98307e+08	5.86904e+08	0.337886
High	Master Protein	Q60930	Voltage-dependent anion-selective channel protein 2 OS=Mus musculus OX=10090 GN=Vdac2 PE=1 SV=2	55	43	31.7	1.96919e+08	1.82477e+08	1.07914
High	Master Protein	Q5SXR6	Clathrin heavy chain OS=Mus musculus OX=10090 GN=Cltc PE=1 SV=1	53	140	191.9	1.90701e+08	4.28533e+08	0.445008
High	Master Protein	Q9D6F9	Tubulin beta-4A chain OS=Mus musculus OX=10090 GN=Tubb4a PE=1 SV=3	84	733	49.6	1.90248e+08	1.94905e+07	9.76105
High	Master Protein	P48722	Heat shock 70 kDa protein 4L OS=Mus musculus OX=10090 GN=Hspa4l PE=1 SV=2	69	119	94.3	1.86103e+08	5.45246e+08	0.341318
High	Master Protein	P09405	Nucleolin OS=Mus musculus OX=10090 GN=Ncl PE=1 SV=2	51	90	76.7	1.84809e+08	7.67857e+08	0.240681
High	Master Protein	P08113	Endoplasmin OS=Mus musculus OX=10090 GN=Hsp90b1 PE=1 SV=2	63	112	92.4	1.79941e+08	5.6165e+08	0.320379
High	Master Protein	Q3U2G2	Heat shock 70 kDa protein 4 OS=Mus musculus OX=10090 GN=Hspa4 PE=1 SV=1	79	145	94.1	1.73514e+08	5.78473e+08	0.299952
High	Master Protein	P51881	ADP/ATP translocase 2 OS=Mus musculus OX=10090 GN=Slc25a5 PE=1 SV=3	61	60	32.9	1.57452e+08	4.90295e+08	0.321137
High	Master Protein	E9QNP0	KxDL motif-containing protein 1 OS=Mus musculus OX=10090 GN=Kxd1 PE=1 SV=1	20	32	26.8	1.45952e+08	2.82835e+08	0.516035
High	Master Protein	P11499	Heat shock protein HSP 90-beta OS=Mus musculus OX=10090 GN=Hsp90ab1 PE=1 SV=3	69	158	83.2	1.42685e+08	4.32157e+08	0.330171
High	Master Protein	E9PX52	Arf-GAP with SH3 domain, ANK repeat and PH domain-containing protein 2 OS=Mus musculus OX=10090 GN=Asap2 PE=1 SV=1	1	3	111.1	140562832	69987016	2.00841
High	Master Protein	P50396	Rab GDP dissociation inhibitor alpha OS=Mus musculus OX=10090 GN=Gdi1 PE=1 SV=3	70	86	50.5	1.38653e+08	4.12237e+08	0.336342
High	Master Protein	P67778	Prohibitin OS=Mus musculus OX=10090 GN=Phb PE=1 SV=1	66	40	29.8	1.33107e+08	3.06423e+08	0.43439
High	Master Protein	P09411	Phosphoglycerate kinase 1 OS=Mus musculus OX=10090 GN=Pgk1 PE=1 SV=4	70	75	44.5	1.31025e+08	5.451e+08	0.240369
High	Master Protein	P62814	V-type proton ATPase subunit B, brain isoform OS=Mus musculus OX=10090 GN=Atp6v1b2 PE=1 SV=1	66	82	56.5	1.26711e+08	3.81653e+08	0.332004
High	Master Protein	Q61171	Peroxiredoxin-2 OS=Mus musculus OX=10090 GN=Prdx2 PE=1 SV=3	52	31	21.8	1.23875e+08	2.79714e+08	0.442863
High	Master Protein	Q3U0V1	Far upstream element-binding protein 2 OS=Mus musculus OX=10090 GN=Khsrp PE=1 SV=2	54	108	76.7	1.23636e+08	3.58096e+08	0.345258
High	Master Protein	Q91ZA3	Propionyl-CoA carboxylase alpha chain, mitochondrial OS=Mus musculus OX=10090 GN=Pcca PE=1 SV=2	63	101	79.9	1.21314e+08	5.58994e+08	0.217022
High	Master Protein	Q8BTS0	DEAD (Asp-Glu-Ala-Asp) box polypeptide 5 OS=Mus musculus OX=10090 GN=Ddx5 PE=1 SV=1	45	63	69.2	1.2068e+08	3.36486e+08	0.358648
High	Master Protein	Q01853	Transitional endoplasmic reticulum ATPase OS=Mus musculus OX=10090 GN=Vcp PE=1 SV=4	65	101	89.3	1.19357e+08	3.29385e+08	0.362363
High	Master Protein	P17742	Peptidyl-prolyl cis-trans isomerase A OS=Mus musculus OX=10090 GN=Ppia PE=1 SV=2	65	41	18	1.17823e+08	3.69344e+08	0.319008
High	Master Protein	Q8C2Q7	Heterogeneous nuclear ribonucleoprotein H OS=Mus musculus OX=10090 GN=Hnrnph1 PE=1 SV=1	50	69	51.2	1.16474e+08	2.79611e+08	0.416558
High	Master Protein	Q03265	ATP synthase subunit alpha, mitochondrial OS=Mus musculus OX=10090 GN=Atp5f1a PE=1 SV=1	58	79	59.7	1.12142e+08	3.48991e+08	0.321332
High	Master Protein	P19096	Fatty acid synthase OS=Mus musculus OX=10090 GN=Fasn PE=1 SV=2	39	134	272.3	1.07073e+08	2.82127e+08	0.37952
High	Master Protein	A0A087WPL5	ATP-dependent RNA helicase A OS=Mus musculus OX=10090 GN=Dhx9 PE=1 SV=1	48	112	149.5	1.05542e+08	2.85488e+08	0.369691
High	Master Protein	P38647	Stress-70 protein, mitochondrial OS=Mus musculus OX=10090 GN=Hspa9 PE=1 SV=3	63	91	73.4	1.02673e+08	3.51286e+08	0.292278
High	Master Protein	P35700	Peroxiredoxin-1 OS=Mus musculus OX=10090 GN=Prdx1 PE=1 SV=1	75	46	22.2	1.00895e+08	2.57532e+08	0.391778
High	Master Protein	P80318	T-complex protein 1 subunit gamma OS=Mus musculus OX=10090 GN=Cct3 PE=1 SV=1	60	83	60.6	9.91597e+07	2.94533e+08	0.336667
High	Master Protein	Q8VDN2	Sodium/potassium-transporting ATPase subunit alpha-1 OS=Mus musculus OX=10090 GN=Atp1a1 PE=1 SV=1	34	74	112.9	9.88163e+07	1.86952e+08	0.528565
High	Master Protein	F8WIT2	Annexin OS=Mus musculus OX=10090 GN=Anxa6 PE=1 SV=1	66	97	75.2	9.85187e+07	3.08149e+08	0.319711
High	Master Protein	P80315	T-complex protein 1 subunit delta OS=Mus musculus OX=10090 GN=Cct4 PE=1 SV=3	68	75	58	9.62317e+07	2.78881e+08	0.345064
High	Master Protein	Q02053	Ubiquitin-like modifier-activating enzyme 1 OS=Mus musculus OX=10090 GN=Uba1 PE=1 SV=1	48	89	117.7	9.29107e+07	2.88897e+08	0.321605
High	Master Protein	B2M1R6	Heterogeneous nuclear ribonucleoprotein K OS=Mus musculus OX=10090 GN=Hnrnpk PE=1 SV=1	64	67	48.5	9.01626e+07	2.40441e+08	0.374988
High	Master Protein	O08553	Dihydropyrimidinase-related protein 2 OS=Mus musculus OX=10090 GN=Dpysl2 PE=1 SV=2	70	70	62.2	8.81216e+07	2.76176e+08	0.319078
High	Master Protein	P40124	Adenylyl cyclase-associated protein 1 OS=Mus musculus OX=10090 GN=Cap1 PE=1 SV=4	71	63	51.5	8.71781e+07	3.1573e+08	0.276116
High	Master Protein	P17710	Hexokinase-1 OS=Mus musculus OX=10090 GN=Hk1 PE=1 SV=3	41	65	108.2	8.68006e+07	1.98335e+08	0.437646
High	Master Protein	E9Q0B5	Fc fragment of IgG-binding protein OS=Mus musculus OX=10090 GN=Fcgbp PE=1 SV=1	0	3	275	84427312	40543904	2.08237
High	Master Protein	P42932	T-complex protein 1 subunit theta OS=Mus musculus OX=10090 GN=Cct8 PE=1 SV=3	63	69	59.5	8.35536e+07	2.30527e+08	0.362446
High	Master Protein	P70168	Importin subunit beta-1 OS=Mus musculus OX=10090 GN=Kpnb1 PE=1 SV=2	43	50	97.1	8.22244e+07	279843689	0.293823
High	Master Protein	Q922I7	MCG13402, isoform CRA_c OS=Mus musculus OX=10090 GN=Ptbp1 PE=1 SV=1	58	59	59.3	7.98152e+07	2.93519e+08	0.271925
High	Master Protein	A0A1W2P768	Histone H3.2 OS=Mus musculus OX=10090 GN=Hist2h3c1 PE=1 SV=1	20	9	20.2	7.84426e+07	334713521	0.234357
High	Master Protein	O88533	Aromatic-L-amino-acid decarboxylase OS=Mus musculus OX=10090 GN=Ddc PE=1 SV=1	41	47	53.8	7.84394e+07	1.57007e+08	0.499591
High	Master Protein	P60843	Eukaryotic initiation factor 4A-I OS=Mus musculus OX=10090 GN=Eif4a1 PE=1 SV=1	64	69	46.1	7.81301e+07	2.75323e+08	0.283777
High	Master Protein	Q9JKF1	Ras GTPase-activating-like protein IQGAP1 OS=Mus musculus OX=10090 GN=Iqgap1 PE=1 SV=2	48	112	188.6	7.73043e+07	2.36388e+08	0.327023
High	Master Protein	P17182	Alpha-enolase OS=Mus musculus OX=10090 GN=Eno1 PE=1 SV=3	75	74	47.1	7.69625e+07	2.74571e+08	0.280301
High	Master Protein	Q5SWU9	Acetyl-CoA carboxylase 1 OS=Mus musculus OX=10090 GN=Acaca PE=1 SV=1	43	144	265.1	7.66888e+07	3.39661e+08	0.22578
High	Master Protein	Q8BMS1	Trifunctional enzyme subunit alpha, mitochondrial OS=Mus musculus OX=10090 GN=Hadha PE=1 SV=1	56	63	82.6	7.65495e+07	2.20898e+08	0.346538
High	Master Protein	P14733	Lamin-B1 OS=Mus musculus OX=10090 GN=Lmnb1 PE=1 SV=3	63	74	66.7	7.52001e+07	2.02706e+08	0.370981
High	Master Protein	Q61881	DNA replication licensing factor MCM7 OS=Mus musculus OX=10090 GN=Mcm7 PE=1 SV=1	52	64	81.2	6.97288e+07	1.8954e+08	0.367884
High	Master Protein	P57780	Alpha-actinin-4 OS=Mus musculus OX=10090 GN=Actn4 PE=1 SV=1	57	90	104.9	6.84457e+07	2.4065e+08	0.28442
High	Master Protein	P08249	Malate dehydrogenase, mitochondrial OS=Mus musculus OX=10090 GN=Mdh2 PE=1 SV=3	64	40	35.6	6.73587e+07	2.03076e+08	0.331692
High	Master Protein	Q9CWF2	Tubulin beta-2B chain OS=Mus musculus OX=10090 GN=Tubb2b PE=1 SV=1	82	786	49.9	6.72285e+07	8.33209e+06	8.06861
High	Master Protein	Q99KI0	Aconitate hydratase, mitochondrial OS=Mus musculus OX=10090 GN=Aco2 PE=1 SV=1	52	62	85.4	6.68698e+07	3.40588e+08	0.196336
High	Master Protein	Q8C854	Myelin expression factor 2 OS=Mus musculus OX=10090 GN=Myef2 PE=1 SV=1	48	74	63.3	6.39739e+07	1.91442e+08	0.334168
High	Master Protein	Q3UEB3	Poly(U)-binding-splicing factor PUF60 OS=Mus musculus OX=10090 GN=Puf60 PE=1 SV=2	49	52	60.2	6.32066e+07	2.03207e+08	0.311045
High	Master Protein	Q922D8	C-1-tetrahydrofolate synthase, cytoplasmic OS=Mus musculus OX=10090 GN=Mthfd1 PE=1 SV=4	45	63	101.1	6.31342e+07	1.82463e+08	0.34601
High	Master Protein	Q8VIJ6	Splicing factor, proline- and glutamine-rich OS=Mus musculus OX=10090 GN=Sfpq PE=1 SV=1	39	66	75.4	6.28587e+07	2.68898e+08	0.233764
High	Master Protein	Q9D0E1	Heterogeneous nuclear ribonucleoprotein M OS=Mus musculus OX=10090 GN=Hnrnpm PE=1 SV=3	50	89	77.6	6.22089e+07	1.89305e+08	0.328617
High	Master Protein	O35286	Pre-mRNA-splicing factor ATP-dependent RNA helicase DHX15 OS=Mus musculus OX=10090 GN=Dhx15 PE=1 SV=2	41	56	90.9	6.22053e+07	1.34835e+08	0.461343
High	Master Protein	F6VW30	14-3-3 protein theta (Fragment) OS=Mus musculus OX=10090 GN=Ywhaq PE=1 SV=1	56	41	34.3	5.97656e+07	1.6356e+08	0.365405
High	Master Protein	P17751	Triosephosphate isomerase OS=Mus musculus OX=10090 GN=Tpi1 PE=1 SV=4	61	33	32.2	5.87922e+07	9.67261e+07	0.607821
High	Master Protein	P97311	DNA replication licensing factor MCM6 OS=Mus musculus OX=10090 GN=Mcm6 PE=1 SV=1	45	61	92.8	5.77704e+07	1.34998e+08	0.427934
High	Master Protein	Q9JMH6	Thioredoxin reductase 1, cytoplasmic OS=Mus musculus OX=10090 GN=Txnrd1 PE=1 SV=3	35	26	67	5.7422e+07	2.86896e+07	2.00149
High	Master Protein	P40142	Transketolase OS=Mus musculus OX=10090 GN=Tkt PE=1 SV=1	50	55	67.6	5.71994e+07	1.86587e+08	0.306556
High	Master Protein	Q60668	Heterogeneous nuclear ribonucleoprotein D0 OS=Mus musculus OX=10090 GN=Hnrnpd PE=1 SV=2	43	41	38.3	5.71168e+07	1.96595e+08	0.29053
High	Master Protein	O08788	Dynactin subunit 1 OS=Mus musculus OX=10090 GN=Dctn1 PE=1 SV=3	52	115	141.6	5.69585e+07	2.73257e+08	0.208443
High	Master Protein	Q60749	KH domain-containing, RNA-binding, signal transduction-associated protein 1 OS=Mus musculus OX=10090 GN=Khdrbs1 PE=1 SV=2	26	38	48.3	5.64184e+07	3.27285e+08	0.172383
High	Master Protein	Q8VEK3	Heterogeneous nuclear ribonucleoprotein U OS=Mus musculus OX=10090 GN=Hnrnpu PE=1 SV=1	30	42	87.9	5.4995e+07	2.49093e+08	0.220781
High	Master Protein	Q61033	Lamina-associated polypeptide 2, isoforms alpha/zeta OS=Mus musculus OX=10090 GN=Tmpo PE=1 SV=4	47	59	75.1	5.44317e+07	2.27511e+08	0.239248
High	Master Protein	P27773	Protein disulfide-isomerase A3 OS=Mus musculus OX=10090 GN=Pdia3 PE=1 SV=2	58	60	56.6	5.43496e+07	2.8429e+08	0.191177
High	Master Protein	Q8VHM5	Heterogeneous nuclear ribonucleoprotein R OS=Mus musculus OX=10090 GN=Hnrnpr PE=1 SV=1	40	45	70.8	5.41524e+07	1.55552e+08	0.34813
High	Master Protein	P05202	Aspartate aminotransferase, mitochondrial OS=Mus musculus OX=10090 GN=Got2 PE=1 SV=1	35	41	47.4	5.40567e+07	1.73407e+08	0.311732
High	Master Protein	Q3UUQ7	GPI inositol-deacylase OS=Mus musculus OX=10090 GN=Pgap1 PE=1 SV=3	25	34	104.5	5.38162e+07	3.84161e+07	1.40088
High	Master Protein	Q6ZQ38	Cullin-associated NEDD8-dissociated protein 1 OS=Mus musculus OX=10090 GN=Cand1 PE=1 SV=2	38	62	136.2	5.29892e+07	1.46095e+08	0.362703
High	Master Protein	P63101	14-3-3 protein zeta/delta OS=Mus musculus OX=10090 GN=Ywhaz PE=1 SV=1	70	49	27.8	5.17395e+07	1.61779e+08	0.319816
High	Master Protein	Q8BK67	Protein RCC2 OS=Mus musculus OX=10090 GN=Rcc2 PE=1 SV=1	70	57	55.9	5.11753e+07	1.92444e+08	0.265923
High	Master Protein	Q99PT1	Rho GDP-dissociation inhibitor 1 OS=Mus musculus OX=10090 GN=Arhgdia PE=1 SV=3	50	29	23.4	5.10545e+07	1.69916e+08	0.300469
High	Master Protein	Q8VDD5	Myosin-9 OS=Mus musculus OX=10090 GN=Myh9 PE=1 SV=4	46	133	226.2	5.05536e+07	2.21567e+08	0.228164
High	Master Protein	P25206	DNA replication licensing factor MCM3 OS=Mus musculus OX=10090 GN=Mcm3 PE=1 SV=2	54	65	91.5	4.9516e+07	1.36575e+08	0.362554
High	Master Protein	Q9Z1Q9	Valine--tRNA ligase OS=Mus musculus OX=10090 GN=Vars PE=1 SV=1	41	68	140.1	4.94562e+07	1.39674e+08	0.354083
High	Master Protein	Q61768	Kinesin-1 heavy chain OS=Mus musculus OX=10090 GN=Kif5b PE=1 SV=3	61	85	109.5	4.90472e+07	1.75939e+08	0.278775
High	Master Protein	Q9D0I9	Arginine--tRNA ligase, cytoplasmic OS=Mus musculus OX=10090 GN=Rars PE=1 SV=2	48	52	75.6	4.88306e+07	1.32612e+08	0.368221
High	Master Protein	Q64737	Trifunctional purine biosynthetic protein adenosine-3 OS=Mus musculus OX=10090 GN=Gart PE=1 SV=3	47	64	107.4	4.81809e+07	1.32327e+08	0.364106
High	Master Protein	Q8CBB6	Histone H2B OS=Mus musculus OX=10090 GN=Hist1h2bq PE=2 SV=1	45	25	14.9	4.76527e+07	2.55332e+08	0.186631
High	Master Protein	P29341	Polyadenylate-binding protein 1 OS=Mus musculus OX=10090 GN=Pabpc1 PE=1 SV=2	54	67	70.6	4.71636e+07	1.66812e+08	0.282735
High	Master Protein	Q9CZU6	Citrate synthase, mitochondrial OS=Mus musculus OX=10090 GN=Cs PE=1 SV=1	44	36	51.7	4.69616e+07	1.77092e+08	0.265181
High	Master Protein	O70252	Heme oxygenase 2 OS=Mus musculus OX=10090 GN=Hmox2 PE=1 SV=1	55	29	35.7	4.59411e+07	2.04766e+07	2.24359
High	Master Protein	O88685	26S proteasome regulatory subunit 6A OS=Mus musculus OX=10090 GN=Psmc3 PE=1 SV=2	63	40	49.5	4.52232e+07	7.94885e+07	0.568928
High	Master Protein	P11983	T-complex protein 1 subunit alpha OS=Mus musculus OX=10090 GN=Tcp1 PE=1 SV=3	47	40	60.4	4.43563e+07	1.00716e+08	0.440408
High	Master Protein	Q99MR8	Methylcrotonoyl-CoA carboxylase subunit alpha, mitochondrial OS=Mus musculus OX=10090 GN=Mccc1 PE=1 SV=2	55	75	79.3	4.43368e+07	2.50283e+08	0.177147
High	Master Protein	Q9JHU4	Cytoplasmic dynein 1 heavy chain 1 OS=Mus musculus OX=10090 GN=Dync1h1 PE=1 SV=2	24	133	531.7	4.38238e+07	1.56407e+08	0.280191
High	Master Protein	P48678	Prelamin-A/C OS=Mus musculus OX=10090 GN=Lmna PE=1 SV=2	52	54	74.2	4.34983e+07	1.46935e+08	0.296037
High	Master Protein	A2A7S7	Tyrosine--tRNA ligase OS=Mus musculus OX=10090 GN=Yars PE=1 SV=1	54	46	63	4.33595e+07	1.53715e+08	0.282078
High	Master Protein	Q8BH59	Calcium-binding mitochondrial carrier protein Aralar1 OS=Mus musculus OX=10090 GN=Slc25a12 PE=1 SV=1	55	52	74.5	4.19581e+07	1.08542e+08	0.386563
High	Master Protein	P24549	Retinal dehydrogenase 1 OS=Mus musculus OX=10090 GN=Aldh1a1 PE=1 SV=5	65	143	54.4	4.16487e+07	8.08023e+07	0.51544
High	Master Protein	Q9CZD3	Glycine--tRNA ligase OS=Mus musculus OX=10090 GN=Gars PE=1 SV=1	37	44	81.8	4.12549e+07	1.65769e+08	0.24887
High	Master Protein	B1AU75	Nuclear autoantigenic sperm protein OS=Mus musculus OX=10090 GN=Nasp PE=1 SV=1	60	64	84	4.05883e+07	1.32236e+08	0.306938
High	Master Protein	Q91VR5	ATP-dependent RNA helicase DDX1 OS=Mus musculus OX=10090 GN=Ddx1 PE=1 SV=1	50	53	82.4	4.01188e+07	1.17564e+08	0.341252
High	Master Protein	P13020	Gelsolin OS=Mus musculus OX=10090 GN=Gsn PE=1 SV=3	40	40	85.9	4.01108e+07	1.57074e+08	0.255362
High	Master Protein	P60335	Poly(rC)-binding protein 1 OS=Mus musculus OX=10090 GN=Pcbp1 PE=1 SV=1	48	26	37.5	3.99662e+07	6.08932e+07	0.656333
High	Master Protein	Q11011	Puromycin-sensitive aminopeptidase OS=Mus musculus OX=10090 GN=Npepps PE=1 SV=2	37	46	103.3	3.82448e+07	9.92326e+07	0.385405
High	Master Protein	Q52KC3	DNA helicase OS=Mus musculus OX=10090 GN=Mcm5 PE=1 SV=1	43	40	82.4	3.80558e+07	1.03436e+08	0.367915
High	Master Protein	B2RQC6	CAD protein OS=Mus musculus OX=10090 GN=Cad PE=1 SV=1	23	61	243.1	3.79914e+07	8.90213e+07	0.426767
High	Master Protein	P97310	DNA replication licensing factor MCM2 OS=Mus musculus OX=10090 GN=Mcm2 PE=1 SV=3	41	56	102	3.67811e+07	1.15933e+08	0.317262
High	Master Protein	P62908	40S ribosomal protein S3 OS=Mus musculus OX=10090 GN=Rps3 PE=1 SV=1	67	34	26.7	3.66132e+07	9.76425e+07	0.374972
High	Master Protein	G5E924	Heterogeneous nuclear ribonucleoprotein L (Fragment) OS=Mus musculus OX=10090 GN=Hnrnpl PE=1 SV=1	56	58	66.9	3.60959e+07	1.36629e+08	0.26419
High	Master Protein	Q8BGQ7	Alanine--tRNA ligase, cytoplasmic OS=Mus musculus OX=10090 GN=Aars PE=1 SV=1	38	48	106.8	3.57046e+07	9.51911e+07	0.375084
High	Master Protein	P46061	Ran GTPase-activating protein 1 OS=Mus musculus OX=10090 GN=Rangap1 PE=1 SV=2	45	43	63.5	3.53664e+07	9.82781e+07	0.35986
High	Master Protein	Q99JF8	PC4 and SFRS1-interacting protein OS=Mus musculus OX=10090 GN=Psip1 PE=1 SV=1	48	51	59.7	3.52227e+07	2.11772e+08	0.166324
High	Master Protein	Q9CWJ9	Bifunctional purine biosynthesis protein PURH OS=Mus musculus OX=10090 GN=Atic PE=1 SV=2	52	39	64.2	3.49848e+07	9.49401e+07	0.368494
High	Master Protein	Q8BKC5	Importin-5 OS=Mus musculus OX=10090 GN=Ipo5 PE=1 SV=3	39	67	123.5	3.48058e+07	8.96809e+07	0.388107
High	Master Protein	Q00PI9	Heterogeneous nuclear ribonucleoprotein U-like protein 2 OS=Mus musculus OX=10090 GN=Hnrnpul2 PE=1 SV=2	34	46	84.9	3.47154e+07	106866119	0.324849
High	Master Protein	Q61029	Lamina-associated polypeptide 2, isoforms beta/delta/epsilon/gamma OS=Mus musculus OX=10090 GN=Tmpo PE=1 SV=4	61	57	50.3	3.4633e+07	1.58159e+08	0.218976
High	Master Protein	Q60864	Stress-induced-phosphoprotein 1 OS=Mus musculus OX=10090 GN=Stip1 PE=1 SV=1	51	54	62.5	3.44691e+07	1.7533e+08	0.196596
High	Master Protein	Q62148	Retinal dehydrogenase 2 OS=Mus musculus OX=10090 GN=Aldh1a2 PE=1 SV=2	51	43	56.6	33975314	3.28913e+07	1.03296
High	Master Protein	Q921M3	Splicing factor 3B subunit 3 OS=Mus musculus OX=10090 GN=Sf3b3 PE=1 SV=1	29	55	135.5	3.36766e+07	7.38308e+07	0.456132
High	Master Protein	P14148	60S ribosomal protein L7 OS=Mus musculus OX=10090 GN=Rpl7 PE=1 SV=2	53	30	31.4	3.36707e+07	3.0039e+08	0.11209
High	Master Protein	Q8K2B3	Succinate dehydrogenase [ubiquinone] flavoprotein subunit, mitochondrial OS=Mus musculus OX=10090 GN=Sdha PE=1 SV=1	38	35	72.5	3.35485e+07	8.61117e+07	0.389593
High	Master Protein	P80313	T-complex protein 1 subunit eta OS=Mus musculus OX=10090 GN=Cct7 PE=1 SV=1	52	49	59.6	3.3323e+07	7.72437e+07	0.431401
High	Master Protein	P56399	Ubiquitin carboxyl-terminal hydrolase 5 OS=Mus musculus OX=10090 GN=Usp5 PE=1 SV=1	39	45	95.8	3.32059e+07	8.96658e+07	0.370329
High	Master Protein	Q9Z204	Heterogeneous nuclear ribonucleoproteins C1/C2 OS=Mus musculus OX=10090 GN=Hnrnpc PE=1 SV=1	50	36	34.4	3.31343e+07	1.05652e+08	0.313617
High	Master Protein	Q6P5B5	Fragile X mental retardation syndrome-related protein 2 OS=Mus musculus OX=10090 GN=Fxr2 PE=1 SV=1	42	27	74.2	3.30646e+07	5.15199e+07	0.641783
High	Master Protein	Q9Z1N5	Spliceosome RNA helicase Ddx39b OS=Mus musculus OX=10090 GN=Ddx39b PE=1 SV=1	33	26	49	3.29955e+07	8.85531e+07	0.372607
High	Master Protein	P13864	DNA (cytosine-5)-methyltransferase 1 OS=Mus musculus OX=10090 GN=Dnmt1 PE=1 SV=5	35	67	183.1	3.27785e+07	1.08766e+08	0.301366
High	Master Protein	Q9Z2X8	Kelch-like ECH-associated protein 1 OS=Mus musculus OX=10090 GN=Keap1 PE=1 SV=1	30	16	69.5	3.22392e+07	7.09256e+06	4.54549
High	Master Protein	Q61753	D-3-phosphoglycerate dehydrogenase OS=Mus musculus OX=10090 GN=Phgdh PE=1 SV=3	30	30	56.5	3.20537e+07	7.61961e+07	0.420673
High	Master Protein	A0A1B0GSX0	L-lactate dehydrogenase OS=Mus musculus OX=10090 GN=Ldha PE=1 SV=1	43	25	39.7	3.17704e+07	9.13643e+07	0.347734
High	Master Protein	Q3V117	ATP-citrate synthase OS=Mus musculus OX=10090 GN=Acly PE=1 SV=1	43	66	120.7	3.17397e+07	1.02632e+08	0.309258
High	Master Protein	Q9QUR6	Prolyl endopeptidase OS=Mus musculus OX=10090 GN=Prep PE=1 SV=1	37	34	80.7	3.14408e+07	6.45054e+07	0.487413
High	Master Protein	A3KGU9	Spectrin alpha chain, non-erythrocytic 1 OS=Mus musculus OX=10090 GN=Sptan1 PE=1 SV=2	35	99	287.4	3.10311e+07	1.23848e+08	0.250558
High	Master Protein	P80317	T-complex protein 1 subunit zeta OS=Mus musculus OX=10090 GN=Cct6a PE=1 SV=3	37	32	58	3.06578e+07	9.04374e+07	0.338995
High	Master Protein	Q8BHN3	Neutral alpha-glucosidase AB OS=Mus musculus OX=10090 GN=Ganab PE=1 SV=1	34	42	106.8	3.04975e+07	7.96343e+07	0.382969
High	Master Protein	P18654	Ribosomal protein S6 kinase alpha-3 OS=Mus musculus OX=10090 GN=Rps6ka3 PE=1 SV=2	35	28	83.6	3.04861e+07	150679212	0.202324
High	Master Protein	P09103	Protein disulfide-isomerase OS=Mus musculus OX=10090 GN=P4hb PE=1 SV=2	57	41	57	2.93185e+07	1.10703e+08	0.264839
High	Master Protein	P61205	ADP-ribosylation factor 3 OS=Mus musculus OX=10090 GN=Arf3 PE=2 SV=2	55	27	20.6	2.90689e+07	8.30406e+07	0.350057
High	Master Protein	Q9Z1R2	Large proline-rich protein BAG6 OS=Mus musculus OX=10090 GN=Bag6 PE=1 SV=1	18	21	121	2.89945e+07	1.01065e+07	2.86889
High	Master Protein	Q61550	Double-strand-break repair protein rad21 homolog OS=Mus musculus OX=10090 GN=Rad21 PE=1 SV=3	46	51	72	2.89039e+07	1.14329e+08	0.252813
High	Master Protein	Q8BGD9	Eukaryotic translation initiation factor 4B OS=Mus musculus OX=10090 GN=Eif4b PE=1 SV=1	39	39	68.8	2.88908e+07	1.25582e+08	0.230054
High	Master Protein	P24547	Inosine-5'-monophosphate dehydrogenase 2 OS=Mus musculus OX=10090 GN=Impdh2 PE=1 SV=2	49	30	55.8	2.86589e+07	1.02854e+08	0.278638
High	Master Protein	Q7TPR4	Alpha-actinin-1 OS=Mus musculus OX=10090 GN=Actn1 PE=1 SV=1	61	102	103	2.86443e+07	9.69597e+07	0.295425
High	Master Protein	A6ZI44	Fructose-bisphosphate aldolase OS=Mus musculus OX=10090 GN=Aldoa PE=1 SV=1	58	35	45.1	2.86287e+07	1.11496e+08	0.256769
High	Master Protein	Q8BTX9	Inactive hydroxysteroid dehydrogenase-like protein 1 OS=Mus musculus OX=10090 GN=Hsdl1 PE=1 SV=1	33	10	36.8	2.85694e+07	5.88412e+06	4.85534
High	Master Protein	F8WHL2	Coatomer subunit alpha OS=Mus musculus OX=10090 GN=Copa PE=1 SV=1	25	41	139.3	2.81805e+07	7.20795e+07	0.390964
High	Master Protein	Q60932	Voltage-dependent anion-selective channel protein 1 OS=Mus musculus OX=10090 GN=Vdac1 PE=1 SV=3	45	24	32.3	2.78853e+07	9.13672e+07	0.305201
High	Master Protein	Q02257	Junction plakoglobin OS=Mus musculus OX=10090 GN=Jup PE=1 SV=3	44	41	81.7	2.77812e+07	4.44967e+07	0.624344
High	Master Protein	Q80X90	Filamin-B OS=Mus musculus OX=10090 GN=Flnb PE=1 SV=3	33	85	277.7	2.75847e+07	9.17424e+07	0.300676
High	Master Protein	Q8CI94	Glycogen phosphorylase, brain form OS=Mus musculus OX=10090 GN=Pygb PE=1 SV=3	37	42	96.7	2.75696e+07	6.97541e+07	0.39524
High	Master Protein	P35980	60S ribosomal protein L18 OS=Mus musculus OX=10090 GN=Rpl18 PE=1 SV=3	37	14	21.6	2.68289e+07	1.47428e+08	0.18198
High	Master Protein	P14869	60S acidic ribosomal protein P0 OS=Mus musculus OX=10090 GN=Rplp0 PE=1 SV=3	46	22	34.2	2.68244e+07	7.66049e+07	0.350165
High	Master Protein	K4DI67	Condensin-2 complex subunit D3 OS=Mus musculus OX=10090 GN=Ncapd3 PE=1 SV=1	23	29	169.3	2.66429e+07	4.57055e+06	5.82926
High	Master Protein	P62754	40S ribosomal protein S6 OS=Mus musculus OX=10090 GN=Rps6 PE=1 SV=1	41	21	28.7	2.66395e+07	1.41803e+08	0.187863
High	Master Protein	J3QNY1	Predicted pseudogene 9242 OS=Mus musculus OX=10090 GN=Gm9242 PE=4 SV=1	38	38	37.1	2.65456e+07	1.75674e+08	0.151107
High	Master Protein	Q9WU78	Programmed cell death 6-interacting protein OS=Mus musculus OX=10090 GN=Pdcd6ip PE=1 SV=3	56	57	96	2.6284e+07	8.22018e+07	0.319749
High	Master Protein	C0HKE4	Histone H2A type 1-E OS=Mus musculus OX=10090 GN=Hist1h2ae PE=1 SV=1	41	11	14.1	2.62218e+07	151862970	0.172668
High	Master Protein	O55234	Proteasome subunit beta type-5 OS=Mus musculus OX=10090 GN=Psmb5 PE=1 SV=3	44	24	28.5	2.61919e+07	6.22173e+07	0.420975
High	Master Protein	Q9DB20	ATP synthase subunit O, mitochondrial OS=Mus musculus OX=10090 GN=Atp5o PE=1 SV=1	60	23	23.3	2.61617e+07	1.13181e+08	0.23115
High	Master Protein	P26043	Radixin OS=Mus musculus OX=10090 GN=Rdx PE=1 SV=3	38	36	68.5	2.57966e+07	9.66931e+07	0.266789
High	Master Protein	P14211	Calreticulin OS=Mus musculus OX=10090 GN=Calr PE=1 SV=1	62	58	48	2.57047e+07	1.68793e+08	0.152286
High	Master Protein	Q3UPL0	Protein transport protein Sec31A OS=Mus musculus OX=10090 GN=Sec31a PE=1 SV=2	29	47	133.5	2.53144e+07	7.39464e+07	0.342335
High	Master Protein	Q8CGC7	Bifunctional glutamate/proline--tRNA ligase OS=Mus musculus OX=10090 GN=Eprs PE=1 SV=4	31	50	170	2.52523e+07	7.44147e+07	0.339345
High	Master Protein	Q8BU30	Isoleucine--tRNA ligase, cytoplasmic OS=Mus musculus OX=10090 GN=Iars PE=1 SV=2	25	40	144.2	2.49839e+07	7.74773e+07	0.322467
High	Master Protein	E9Q7G0	Nuclear mitotic apparatus protein 1 OS=Mus musculus OX=10090 GN=Numa1 PE=1 SV=1	36	92	235.5	2.4815e+07	8.97151e+07	0.276598
High	Master Protein	P52431	DNA polymerase delta catalytic subunit OS=Mus musculus OX=10090 GN=Pold1 PE=1 SV=2	21	28	123.7	2.47853e+07	5.98731e+07	0.413964
High	Master Protein	Q9D8N0	Elongation factor 1-gamma OS=Mus musculus OX=10090 GN=Eef1g PE=1 SV=3	32	26	50	2.46502e+07	9.50647e+07	0.259299
High	Master Protein	P12382	ATP-dependent 6-phosphofructokinase, liver type OS=Mus musculus OX=10090 GN=Pfkl PE=1 SV=4	35	39	85.3	2.425e+07	5.71313e+07	0.424462
High	Master Protein	Q9CZ13	Cytochrome b-c1 complex subunit 1, mitochondrial OS=Mus musculus OX=10090 GN=Uqcrc1 PE=1 SV=2	40	32	52.8	2.41491e+07	7.78905e+07	0.310038
High	Master Protein	Q9JIF7	Coatomer subunit beta OS=Mus musculus OX=10090 GN=Copb1 PE=1 SV=1	33	49	107	2.41316e+07	7.19626e+07	0.335335
High	Master Protein	Q9QZE5	Coatomer subunit gamma-1 OS=Mus musculus OX=10090 GN=Copg1 PE=1 SV=1	39	39	97.5	2.40414e+07	6.89703e+07	0.348576
High	Master Protein	Q6P5F9	Exportin-1 OS=Mus musculus OX=10090 GN=Xpo1 PE=1 SV=1	31	49	123	2.37528e+07	6.44117e+07	0.368766
High	Master Protein	P25444	40S ribosomal protein S2 OS=Mus musculus OX=10090 GN=Rps2 PE=1 SV=3	40	20	31.2	2.37452e+07	8.89868e+07	0.26684
High	Master Protein	O88569	Heterogeneous nuclear ribonucleoproteins A2/B1 OS=Mus musculus OX=10090 GN=Hnrnpa2b1 PE=1 SV=2	58	34	37.4	2.36373e+07	1.09269e+08	0.216323
High	Master Protein	Q3UJB0	Splicing factor 3b, subunit 2 OS=Mus musculus OX=10090 GN=Sf3b2 PE=1 SV=1	43	60	98.1	2.35665e+07	1.01001e+08	0.233329
High	Master Protein	Q99KP6	Pre-mRNA-processing factor 19 OS=Mus musculus OX=10090 GN=Prpf19 PE=1 SV=1	45	22	55.2	2.33905e+07	5.15074e+07	0.45412
High	Master Protein	Q9CZW5	Mitochondrial import receptor subunit TOM70 OS=Mus musculus OX=10090 GN=Tomm70 PE=1 SV=2	35	32	67.5	2.33567e+07	7.44812e+07	0.313593
High	Master Protein	Q9Z2X1	Heterogeneous nuclear ribonucleoprotein F OS=Mus musculus OX=10090 GN=Hnrnpf PE=1 SV=3	48	36	45.7	2.32753e+07	4.817e+07	0.483191
High	Master Protein	Q3U1J4	DNA damage-binding protein 1 OS=Mus musculus OX=10090 GN=Ddb1 PE=1 SV=2	23	32	126.8	2.31471e+07	5.80704e+07	0.398605
High	Master Protein	Q8BMF4	Dihydrolipoyllysine-residue acetyltransferase component of pyruvate dehydrogenase complex, mitochondrial OS=Mus musculus OX=10090 GN=Dlat PE=1 SV=2	31	19	67.9	2.30864e+07	6.33429e+07	0.364467
High	Master Protein	Q3THK7	GMP synthase [glutamine-hydrolyzing] OS=Mus musculus OX=10090 GN=Gmps PE=1 SV=2	54	37	76.7	2.30425e+07	5.81506e+07	0.396256
High	Master Protein	P80316	T-complex protein 1 subunit epsilon OS=Mus musculus OX=10090 GN=Cct5 PE=1 SV=1	52	39	59.6	2.30401e+07	7.38148e+07	0.312134
High	Master Protein	Q3TZZ7	Extended synaptotagmin-2 OS=Mus musculus OX=10090 GN=Esyt2 PE=1 SV=1	25	27	94.1	2.29119e+07	3.3961e+07	0.674653
High	Master Protein	Q9JKR6	Hypoxia up-regulated protein 1 OS=Mus musculus OX=10090 GN=Hyou1 PE=1 SV=1	45	48	111.1	2.28792e+07	8.52522e+07	0.26837
High	Master Protein	P62806	Histone H4 OS=Mus musculus OX=10090 GN=Hist1h4a PE=1 SV=2	52	21	11.4	2.26678e+07	1.09938e+08	0.206187
High	Master Protein	Q8C605	ATP-dependent 6-phosphofructokinase OS=Mus musculus OX=10090 GN=Pfkp PE=1 SV=1	33	32	85.5	2.26275e+07	30212761	0.74894
High	Master Protein	Q6P4T2	U5 small nuclear ribonucleoprotein 200 kDa helicase OS=Mus musculus OX=10090 GN=Snrnp200 PE=1 SV=1	21	53	244.4	2.2624e+07	5.32686e+07	0.424715
High	Master Protein	P30416	Peptidyl-prolyl cis-trans isomerase FKBP4 OS=Mus musculus OX=10090 GN=Fkbp4 PE=1 SV=5	55	35	51.5	2.24111e+07	8.93497e+07	0.250824
High	Master Protein	P07724	Serum albumin OS=Mus musculus OX=10090 GN=Alb PE=1 SV=3	2	3	68.6	22273276	81583936	0.273011
High	Master Protein	Q60597	2-oxoglutarate dehydrogenase, mitochondrial OS=Mus musculus OX=10090 GN=Ogdh PE=1 SV=3	33	36	116.4	2.21322e+07	6.79775e+07	0.325581
High	Master Protein	G3X972	SEC24 related gene family, member C (S. cerevisiae), isoform CRA_a OS=Mus musculus OX=10090 GN=Sec24c PE=1 SV=1	26	37	118.5	2.20363e+07	6.15036e+07	0.358293
High	Master Protein	Q62351	Transferrin receptor protein 1 OS=Mus musculus OX=10090 GN=Tfrc PE=1 SV=1	27	40	85.7	2.19854e+07	5.9197e+07	0.371394
High	Master Protein	Q9EQH3	Vacuolar protein sorting-associated protein 35 OS=Mus musculus OX=10090 GN=Vps35 PE=1 SV=1	30	30	91.7	2.19349e+07	6.29842e+07	0.34826
High	Master Protein	Q78PY7	Staphylococcal nuclease domain-containing protein 1 OS=Mus musculus OX=10090 GN=Snd1 PE=1 SV=1	41	48	102	2.18636e+07	6.80087e+07	0.321482
High	Master Protein	P62962	Profilin-1 OS=Mus musculus OX=10090 GN=Pfn1 PE=1 SV=2	67	31	14.9	2.18483e+07	5.98921e+07	0.364795
High	Master Protein	Q9D0K2	Succinyl-CoA:3-ketoacid coenzyme A transferase 1, mitochondrial OS=Mus musculus OX=10090 GN=Oxct1 PE=1 SV=1	45	39	56	2.17642e+07	9.03086e+07	0.240998
High	Master Protein	Q9D0F9	Phosphoglucomutase-1 OS=Mus musculus OX=10090 GN=Pgm1 PE=1 SV=4	42	33	61.4	2.16597e+07	6.28839e+07	0.344439
High	Master Protein	Q8CFI7	DNA-directed RNA polymerase II subunit RPB2 OS=Mus musculus OX=10090 GN=Polr2b PE=1 SV=2	31	46	133.8	2.15907e+07	6.47516e+07	0.333439
High	Master Protein	P14685	26S proteasome non-ATPase regulatory subunit 3 OS=Mus musculus OX=10090 GN=Psmd3 PE=1 SV=3	52	37	60.7	2.15216e+07	8.62e+07	0.249671
High	Master Protein	P47911	60S ribosomal protein L6 OS=Mus musculus OX=10090 GN=Rpl6 PE=1 SV=3	39	24	33.5	2.14527e+07	1.66941e+08	0.128505
High	Master Protein	O35643	AP-1 complex subunit beta-1 OS=Mus musculus OX=10090 GN=Ap1b1 PE=1 SV=2	40	46	103.9	2.14266e+07	6.71208e+07	0.319224
High	Master Protein	Q91VR2	ATP synthase subunit gamma, mitochondrial OS=Mus musculus OX=10090 GN=Atp5f1c PE=1 SV=1	31	29	32.9	2.13618e+07	6.49482e+07	0.328905
High	Master Protein	Q01320	DNA topoisomerase 2-alpha OS=Mus musculus OX=10090 GN=Top2a PE=1 SV=2	29	67	172.7	2.12523e+07	1.299e+08	0.163606
High	Master Protein	Q91VC3	Eukaryotic initiation factor 4A-III OS=Mus musculus OX=10090 GN=Eif4a3 PE=1 SV=3	54	41	46.8	2.09375e+07	7.22915e+07	0.289625
High	Master Protein	Q61024	Asparagine synthetase [glutamine-hydrolyzing] OS=Mus musculus OX=10090 GN=Asns PE=1 SV=3	43	32	64.2	2.08778e+07	6.53593e+07	0.319431
High	Master Protein	Q6PB66	Leucine-rich PPR motif-containing protein, mitochondrial OS=Mus musculus OX=10090 GN=Lrpprc PE=1 SV=2	28	53	156.5	2.08669e+07	6.72072e+07	0.310486
High	Master Protein	P62192	26S proteasome regulatory subunit 4 OS=Mus musculus OX=10090 GN=Psmc1 PE=1 SV=1	50	25	49.2	2.07256e+07	6.31078e+07	0.328415
High	Master Protein	Q61598	Rab GDP dissociation inhibitor beta OS=Mus musculus OX=10090 GN=Gdi2 PE=1 SV=1	70	45	50.5	2.06205e+07	7.56237e+07	0.272672
High	Master Protein	Q91YE6	Importin-9 OS=Mus musculus OX=10090 GN=Ipo9 PE=1 SV=3	31	31	116	2.04622e+07	5.83098e+07	0.350923
High	Master Protein	Q9DBC7	cAMP-dependent protein kinase type I-alpha regulatory subunit OS=Mus musculus OX=10090 GN=Prkar1a PE=1 SV=3	35	23	43.2	1.99576e+07	4.96927e+07	0.40162
High	Master Protein	Q6PHQ9	Polyadenylate-binding protein OS=Mus musculus OX=10090 GN=Pabpc4 PE=1 SV=1	36	35	72.2	1.99575e+07	5.7149e+07	0.349218
High	Master Protein	P07742	Ribonucleoside-diphosphate reductase large subunit OS=Mus musculus OX=10090 GN=Rrm1 PE=1 SV=2	36	33	90.2	1.99308e+07	7.64508e+07	0.260702
High	Master Protein	A0A0A0MQA5	Tubulin alpha chain (Fragment) OS=Mus musculus OX=10090 GN=Tuba4a PE=1 SV=1	53	56	52.9	1.98913e+07	5.46536e+07	0.363952
High	Master Protein	P56480	ATP synthase subunit beta, mitochondrial OS=Mus musculus OX=10090 GN=Atp5f1b PE=1 SV=2	52	37	56.3	1.97592e+07	5.50679e+07	0.358815
High	Master Protein	Q60598	Src substrate cortactin OS=Mus musculus OX=10090 GN=Cttn PE=1 SV=2	44	33	61.2	1.96534e+07	9.54141e+07	0.20598
High	Master Protein	Q3TXS7	26S proteasome non-ATPase regulatory subunit 1 OS=Mus musculus OX=10090 GN=Psmd1 PE=1 SV=1	40	44	105.7	1.93016e+07	5.24767e+07	0.367814
High	Master Protein	Q5XJY5	Coatomer subunit delta OS=Mus musculus OX=10090 GN=Arcn1 PE=1 SV=2	43	31	57.2	1.91993e+07	5.26582e+07	0.364603
High	Master Protein	Q61074	Protein phosphatase 1G OS=Mus musculus OX=10090 GN=Ppm1g PE=1 SV=3	45	32	58.7	1.91892e+07	6.3933e+07	0.300145
High	Master Protein	Q91VD9	NADH-ubiquinone oxidoreductase 75 kDa subunit, mitochondrial OS=Mus musculus OX=10090 GN=Ndufs1 PE=1 SV=2	39	34	79.7	1.90538e+07	6.793e+07	0.280491
High	Master Protein	Q922B2	Aspartate--tRNA ligase, cytoplasmic OS=Mus musculus OX=10090 GN=Dars PE=1 SV=2	47	36	57.1	1.87929e+07	6.57786e+07	0.285699
High	Master Protein	Q8K4Z5	Splicing factor 3A subunit 1 OS=Mus musculus OX=10090 GN=Sf3a1 PE=1 SV=1	35	37	88.5	1.85198e+07	6.27965e+07	0.294918
High	Master Protein	Q9EPU0	Regulator of nonsense transcripts 1 OS=Mus musculus OX=10090 GN=Upf1 PE=1 SV=2	34	45	123.9	1.82829e+07	5.74207e+07	0.318403
High	Master Protein	Q9WTX6	Cullin-1 OS=Mus musculus OX=10090 GN=Cul1 PE=1 SV=1	45	42	89.6	1.82789e+07	6.06561e+07	0.301352
High	Master Protein	Q76MZ3	Serine/threonine-protein phosphatase 2A 65 kDa regulatory subunit A alpha isoform OS=Mus musculus OX=10090 GN=Ppp2r1a PE=1 SV=3	30	28	65.3	1.82068e+07	4.23779e+07	0.429629
High	Master Protein	Q8BK64	Activator of 90 kDa heat shock protein ATPase homolog 1 OS=Mus musculus OX=10090 GN=Ahsa1 PE=1 SV=2	49	22	38.1	1.81865e+07	72852011	0.249637
High	Master Protein	Q9D6Z1	Nucleolar protein 56 OS=Mus musculus OX=10090 GN=Nop56 PE=1 SV=2	45	32	64.4	1.8145e+07	6.05922e+07	0.299461
High	Master Protein	O70194	Eukaryotic translation initiation factor 3 subunit D OS=Mus musculus OX=10090 GN=Eif3d PE=1 SV=2	42	29	63.9	1.80237e+07	7.43802e+07	0.242319
High	Master Protein	Q3TEA8	Heterochromatin protein 1-binding protein 3 OS=Mus musculus OX=10090 GN=Hp1bp3 PE=1 SV=1	40	27	60.8	1.80117e+07	1.36321e+08	0.132127
High	Master Protein	Q9DCD0	6-phosphogluconate dehydrogenase, decarboxylating OS=Mus musculus OX=10090 GN=Pgd PE=1 SV=3	34	25	53.2	1.79799e+07	4.38237e+07	0.410279
High	Master Protein	Q8VDM4	26S proteasome non-ATPase regulatory subunit 2 OS=Mus musculus OX=10090 GN=Psmd2 PE=1 SV=1	27	36	100.1	1.79568e+07	5.00253e+07	0.358953
High	Master Protein	P46935	E3 ubiquitin-protein ligase NEDD4 OS=Mus musculus OX=10090 GN=Nedd4 PE=1 SV=3	30	37	102.6	1.78947e+07	5.16924e+07	0.346177
High	Master Protein	P00405	Cytochrome c oxidase subunit 2 OS=Mus musculus OX=10090 GN=Mtco2 PE=1 SV=1	23	16	26	1.78162e+07	5.17357e+07	0.344369
High	Master Protein	Q8K1M6	Dynamin-1-like protein OS=Mus musculus OX=10090 GN=Dnm1l PE=1 SV=2	35	24	82.6	1.76467e+07	3.24726e+07	0.543433
High	Master Protein	A2AH85	116 kDa U5 small nuclear ribonucleoprotein component OS=Mus musculus OX=10090 GN=Eftud2 PE=1 SV=1	29	34	109.4	1.76387e+07	5.01283e+07	0.351871
High	Master Protein	P62259	14-3-3 protein epsilon OS=Mus musculus OX=10090 GN=Ywhae PE=1 SV=1	58	47	29.2	1.76011e+07	4.85889e+07	0.362245
High	Master Protein	Q61191	Host cell factor 1 OS=Mus musculus OX=10090 GN=Hcfc1 PE=1 SV=2	18	37	210.3	1.75405e+07	5.0335e+07	0.348475
High	Master Protein	A0A0G2JGW9	Far upstream element-binding protein 1 OS=Mus musculus OX=10090 GN=Fubp1 PE=1 SV=1	40	41	67.5	1.74523e+07	5.51303e+07	0.316565
High	Master Protein	O88325	Alpha-N-acetylglucosaminidase OS=Mus musculus OX=10090 GN=Naglu PE=1 SV=1	30	30	82.5	1.72594e+07	4.98918e+07	0.345937
High	Master Protein	Q7TMB8	Cytoplasmic FMR1-interacting protein 1 OS=Mus musculus OX=10090 GN=Cyfip1 PE=1 SV=1	15	28	145.1	1.71988e+07	4.30141e+07	0.399842
High	Master Protein	Q9CZN7	Serine hydroxymethyltransferase, mitochondrial OS=Mus musculus OX=10090 GN=Shmt2 PE=1 SV=1	46	27	55.7	1.71749e+07	4.49506e+07	0.382084
High	Master Protein	P17918	Proliferating cell nuclear antigen OS=Mus musculus OX=10090 GN=Pcna PE=1 SV=2	70	30	28.8	1.70689e+07	5.6455e+07	0.302345
High	Master Protein	Q921F2	TAR DNA-binding protein 43 OS=Mus musculus OX=10090 GN=Tardbp PE=1 SV=1	41	21	44.5	1.69739e+07	5.70177e+07	0.297695
High	Master Protein	Q8BH74	Nuclear pore complex protein Nup107 OS=Mus musculus OX=10090 GN=Nup107 PE=1 SV=1	13	16	106.7	1.69457e+07	1.28377e+07	1.31999
High	Master Protein	J3QMG3	Voltage-dependent anion-selective channel protein 3 OS=Mus musculus OX=10090 GN=Vdac3 PE=1 SV=1	39	23	30.8	1.69399e+07	2.8466e+07	0.595093
High	Master Protein	Q5EBP8	Heterogeneous nuclear ribonucleoprotein A1 OS=Mus musculus OX=10090 GN=Hnrnpa1 PE=1 SV=1	41	38	38.8	1.65678e+07	1.03063e+08	0.160755
High	Master Protein	Q8BMA6	Signal recognition particle subunit SRP68 OS=Mus musculus OX=10090 GN=Srp68 PE=1 SV=2	44	32	70.5	1.65472e+07	4.60302e+07	0.359486
High	Master Protein	Q64514	Tripeptidyl-peptidase 2 OS=Mus musculus OX=10090 GN=Tpp2 PE=1 SV=3	26	38	139.8	1.64753e+07	4.56056e+07	0.361256
High	Master Protein	P54071	Isocitrate dehydrogenase [NADP], mitochondrial OS=Mus musculus OX=10090 GN=Idh2 PE=1 SV=3	49	36	50.9	1.63773e+07	6.95891e+07	0.235343
High	Master Protein	P06745	Glucose-6-phosphate isomerase OS=Mus musculus OX=10090 GN=Gpi PE=1 SV=4	38	28	62.7	1.6293e+07	6.05549e+07	0.269061
High	Master Protein	P54728	UV excision repair protein RAD23 homolog B OS=Mus musculus OX=10090 GN=Rad23b PE=1 SV=2	32	13	43.5	1.62581e+07	4.97578e+07	0.326745
High	Master Protein	Q91ZW3	SWI/SNF-related matrix-associated actin-dependent regulator of chromatin subfamily A member 5 OS=Mus musculus OX=10090 GN=Smarca5 PE=1 SV=1	28	44	121.6	1.62113e+07	5.10241e+07	0.317719
High	Master Protein	D3YTQ3	Heterogeneous nuclear ribonucleoprotein D-like OS=Mus musculus OX=10090 GN=Hnrnpdl PE=1 SV=1	32	30	46.2	1.61116e+07	6.03354e+07	0.267035
High	Master Protein	Q9ERK4	Exportin-2 OS=Mus musculus OX=10090 GN=Cse1l PE=1 SV=1	32	30	110.4	1.60898e+07	4.9374e+07	0.325877
High	Master Protein	P32921	Tryptophan--tRNA ligase, cytoplasmic OS=Mus musculus OX=10090 GN=Wars PE=1 SV=2	43	25	54.3	1.60381e+07	6.53697e+07	0.245344
High	Master Protein	E9QKR0	Guanine nucleotide-binding protein G(I)/G(S)/G(T) subunit beta-2 OS=Mus musculus OX=10090 GN=Gnb2 PE=1 SV=1	31	13	41.4	1.59861e+07	2.7703e+07	0.577052
High	Master Protein	Q9D7P9	Serpin B12 OS=Mus musculus OX=10090 GN=Serpinb12 PE=2 SV=1	52	26	47.8	1.59142e+07	5.54199e+07	0.287157
High	Master Protein	Q8BVQ9	26S proteasome regulatory subunit 7 OS=Mus musculus OX=10090 GN=Psmc2 PE=1 SV=1	44	33	52.8	1.58741e+07	6.00459e+07	0.264367
High	Master Protein	H3BJW3	Cleavage and polyadenylation-specificity factor subunit 6 OS=Mus musculus OX=10090 GN=Cpsf6 PE=1 SV=1	19	14	63.4	1.58618e+07	4.12624e+07	0.384413
High	Master Protein	Q8VDP4	Cell cycle and apoptosis regulator protein 2 OS=Mus musculus OX=10090 GN=Ccar2 PE=1 SV=2	32	35	102.9	1.57497e+07	4.41285e+07	0.356906
High	Master Protein	Q6ZWN5	40S ribosomal protein S9 OS=Mus musculus OX=10090 GN=Rps9 PE=1 SV=3	51	21	22.6	1.56787e+07	6.8518e+07	0.228826
High	Master Protein	Q6NZJ6	Eukaryotic translation initiation factor 4 gamma 1 OS=Mus musculus OX=10090 GN=Eif4g1 PE=1 SV=1	27	47	176	1.55947e+07	7.8339e+07	0.199067
High	Master Protein	Q9D8E6	60S ribosomal protein L4 OS=Mus musculus OX=10090 GN=Rpl4 PE=1 SV=3	49	41	47.1	1.54605e+07	1.24795e+08	0.123887
High	Master Protein	P70296	Phosphatidylethanolamine-binding protein 1 OS=Mus musculus OX=10090 GN=Pebp1 PE=1 SV=3	70	14	20.8	1.54317e+07	6.18513e+07	0.249496
High	Master Protein	Q99KE1	NAD-dependent malic enzyme, mitochondrial OS=Mus musculus OX=10090 GN=Me2 PE=1 SV=1	39	24	65.8	1.53658e+07	3.79918e+07	0.404451
High	Master Protein	Q3V3R1	Monofunctional C1-tetrahydrofolate synthase, mitochondrial OS=Mus musculus OX=10090 GN=Mthfd1l PE=1 SV=2	37	38	105.7	1.536e+07	4.9357e+07	0.311201
High	Master Protein	Q61990	Poly(rC)-binding protein 2 OS=Mus musculus OX=10090 GN=Pcbp2 PE=1 SV=1	36	17	38.2	1.53564e+07	3.40151e+07	0.451458
High	Master Protein	Q922F4	Tubulin beta-6 chain OS=Mus musculus OX=10090 GN=Tubb6 PE=1 SV=1	45	281	50.1	1.52339e+07	2.43091e+06	6.26674
High	Master Protein	Q9Z1F9	SUMO-activating enzyme subunit 2 OS=Mus musculus OX=10090 GN=Uba2 PE=1 SV=1	44	31	70.5	1.51678e+07	5.13008e+07	0.295664
High	Master Protein	Q8K310	Matrin-3 OS=Mus musculus OX=10090 GN=Matr3 PE=1 SV=1	32	29	94.6	1.51531e+07	5.96814e+07	0.253901
High	Master Protein	Q8K3G9	DCC-interacting protein 13-beta OS=Mus musculus OX=10090 GN=Appl2 PE=1 SV=1	43	32	73.8	1.50891e+07	4.5587e+07	0.330995
High	Master Protein	A0A1L1STE4	Interleukin enhancer-binding factor 3 OS=Mus musculus OX=10090 GN=Ilf3 PE=1 SV=1	44	44	97.4	1.50221e+07	7.45899e+07	0.201395
High	Master Protein	Q5SWN2	Replication protein A subunit OS=Mus musculus OX=10090 GN=Rpa1 PE=1 SV=2	38	32	71.4	1.50199e+07	4.99893e+07	0.300463
High	Master Protein	G5E866	Splicing factor 3B subunit 1 OS=Mus musculus OX=10090 GN=Sf3b1 PE=1 SV=1	31	42	145.7	1.49847e+07	4.68047e+07	0.320153
High	Master Protein	Q810A7	ATP-dependent RNA helicase DDX42 OS=Mus musculus OX=10090 GN=Ddx42 PE=1 SV=3	33	31	101.9	1.49765e+07	6.20222e+07	0.24147
High	Master Protein	Q9JHW9	Aldehyde dehydrogenase family 1 member A3 OS=Mus musculus OX=10090 GN=Aldh1a3 PE=1 SV=1	34	30	56.1	1.49192e+07	8.9201e+06	1.67253
High	Master Protein	Q3U4X8	DNA ligase OS=Mus musculus OX=10090 GN=Lig1 PE=1 SV=1	36	36	104	1.49073e+07	4.96113e+07	0.300483
High	Master Protein	Q99KK7	Dipeptidyl peptidase 3 OS=Mus musculus OX=10090 GN=Dpp3 PE=1 SV=2	41	29	82.8	1.47591e+07	4.72781e+07	0.312176
High	Master Protein	Q3U741	DEAD (Asp-Glu-Ala-Asp) box polypeptide 17, isoform CRA_a OS=Mus musculus OX=10090 GN=Ddx17 PE=1 SV=1	31	40	72.5	1.45886e+07	4.21195e+07	0.346361
High	Master Protein	Q8C483	Serine--tRNA ligase, cytoplasmic OS=Mus musculus OX=10090 GN=Sars PE=1 SV=1	46	33	61.1	1.44378e+07	6.04969e+07	0.238654
High	Master Protein	Q9CR57	60S ribosomal protein L14 OS=Mus musculus OX=10090 GN=Rpl14 PE=1 SV=3	20	7	23.5	1.44337e+07	5.68315e+07	0.253974
High	Master Protein	P26231	Catenin alpha-1 OS=Mus musculus OX=10090 GN=Ctnna1 PE=1 SV=1	44	37	100	1.44325e+07	4.44642e+07	0.324588
High	Master Protein	P10852	4F2 cell-surface antigen heavy chain OS=Mus musculus OX=10090 GN=Slc3a2 PE=1 SV=1	30	17	58.3	1.44056e+07	3.71708e+07	0.387553
High	Master Protein	P29416	Beta-hexosaminidase subunit alpha OS=Mus musculus OX=10090 GN=Hexa PE=1 SV=2	23	18	60.6	1.43892e+07	5.35869e+07	0.268522
High	Master Protein	G5E902	MCG10343, isoform CRA_b OS=Mus musculus OX=10090 GN=Slc25a3 PE=1 SV=1	28	14	39.7	1.43635e+07	3.7131e+07	0.386832
High	Master Protein	P12970	60S ribosomal protein L7a OS=Mus musculus OX=10090 GN=Rpl7a PE=1 SV=2	36	18	30	1.43125e+07	1.02509e+08	0.139622
High	Master Protein	P62869	Elongin-B OS=Mus musculus OX=10090 GN=Elob PE=1 SV=1	46	15	13.2	1.42743e+07	4.58098e+07	0.311599
High	Master Protein	Q64727	Vinculin OS=Mus musculus OX=10090 GN=Vcl PE=1 SV=4	36	44	116.6	1.42353e+07	5.18262e+07	0.274674
High	Master Protein	P51150	Ras-related protein Rab-7a OS=Mus musculus OX=10090 GN=Rab7a PE=1 SV=2	71	13	23.5	1.418e+07	4.0651e+07	0.348823
High	Master Protein	Q8QZT1	Acetyl-CoA acetyltransferase, mitochondrial OS=Mus musculus OX=10090 GN=Acat1 PE=1 SV=1	44	26	44.8	1.40596e+07	5.87211e+07	0.23943
High	Master Protein	P97855	Ras GTPase-activating protein-binding protein 1 OS=Mus musculus OX=10090 GN=G3bp1 PE=1 SV=1	39	23	51.8	1.39761e+07	6.39872e+07	0.218421
High	Master Protein	P48962	ADP/ATP translocase 1 OS=Mus musculus OX=10090 GN=Slc25a4 PE=1 SV=4	60	52	32.9	1.39753e+07	6.16495e+07	0.22669
High	Master Protein	Q62318	Transcription intermediary factor 1-beta OS=Mus musculus OX=10090 GN=Trim28 PE=1 SV=3	36	34	88.8	1.38473e+07	4.96125e+07	0.279108
High	Master Protein	Q8BLF1	Neutral cholesterol ester hydrolase 1 OS=Mus musculus OX=10090 GN=Nceh1 PE=1 SV=1	25	12	45.7	1.38109e+07	1.10637e+07	1.24831
High	Master Protein	Q9D554	Splicing factor 3A subunit 3 OS=Mus musculus OX=10090 GN=Sf3a3 PE=1 SV=2	31	23	58.8	1.37545e+07	5.91285e+07	0.23262
High	Master Protein	Q8C2Q3	RNA-binding protein 14 OS=Mus musculus OX=10090 GN=Rbm14 PE=1 SV=1	36	26	69.4	1.36589e+07	4.48176e+07	0.304766
High	Master Protein	Q569Z5	Probable ATP-dependent RNA helicase DDX46 OS=Mus musculus OX=10090 GN=Ddx46 PE=1 SV=2	31	41	117.4	1.36457e+07	9.80377e+07	0.139188
High	Master Protein	P47915	60S ribosomal protein L29 OS=Mus musculus OX=10090 GN=Rpl29 PE=1 SV=2	24	5	17.6	1.35107e+07	6.31333e+07	0.214003
High	Master Protein	P14152	Malate dehydrogenase, cytoplasmic OS=Mus musculus OX=10090 GN=Mdh1 PE=1 SV=3	42	20	36.5	1.33724e+07	9.54565e+07	0.140089
High	Master Protein	A0A0R4J0T8	ADP-ribosylation factor GTPase-activating protein 3 OS=Mus musculus OX=10090 GN=Arfgap3 PE=1 SV=1	37	24	57.5	1.32649e+07	2.55134e+07	0.519918
High	Master Protein	Q61699	Heat shock protein 105 kDa OS=Mus musculus OX=10090 GN=Hsph1 PE=1 SV=2	39	42	96.3	1.31788e+07	4.37076e+07	0.301522
High	Master Protein	P62918	60S ribosomal protein L8 OS=Mus musculus OX=10090 GN=Rpl8 PE=1 SV=2	34	12	28	1.31354e+07	7.05807e+07	0.186105
High	Master Protein	Q9Z1G4	V-type proton ATPase 116 kDa subunit a isoform 1 OS=Mus musculus OX=10090 GN=Atp6v0a1 PE=1 SV=3	19	21	96.4	1.30348e+07	3.77719e+07	0.345092
High	Master Protein	Q9CZM2	60S ribosomal protein L15 OS=Mus musculus OX=10090 GN=Rpl15 PE=2 SV=4	39	17	24.1	1.29871e+07	1.14535e+08	0.113389
High	Master Protein	Q8VCG1	Deoxyuridine triphosphatase OS=Mus musculus OX=10090 GN=Dut PE=1 SV=1	50	14	21.2	1.29729e+07	3.69069e+07	0.351505
High	Master Protein	O88342	WD repeat-containing protein 1 OS=Mus musculus OX=10090 GN=Wdr1 PE=1 SV=3	38	24	66.4	1.29685e+07	4.18186e+07	0.310113
High	Master Protein	Q8CGK3	Lon protease homolog, mitochondrial OS=Mus musculus OX=10090 GN=Lonp1 PE=1 SV=2	30	35	105.8	1.2937e+07	4.35504e+07	0.297058
High	Master Protein	P62334	26S proteasome regulatory subunit 10B OS=Mus musculus OX=10090 GN=Psmc6 PE=1 SV=1	49	31	44.1	1.29061e+07	4.39889e+07	0.293395
High	Master Protein	Q60604	Adseverin OS=Mus musculus OX=10090 GN=Scin PE=1 SV=3	34	35	80.2	1.29047e+07	5.27917e+07	0.244445
High	Master Protein	D3Z041	Long-chain-fatty-acid--CoA ligase 1 OS=Mus musculus OX=10090 GN=Acsl1 PE=1 SV=1	30	30	78	1.28917e+07	3.9633e+07	0.325276
High	Master Protein	Q3TE40	Replication protein A 32 kDa subunit OS=Mus musculus OX=10090 GN=Rpa2 PE=1 SV=1	39	15	29.4	1.28772e+07	4.49565e+07	0.286436
High	Master Protein	A0A0R4IZY0	Thimet oligopeptidase OS=Mus musculus OX=10090 GN=Thop1 PE=1 SV=1	32	27	78	1.28076e+07	3.08375e+07	0.415327
High	Master Protein	Q9R0P9	Ubiquitin carboxyl-terminal hydrolase isozyme L1 OS=Mus musculus OX=10090 GN=Uchl1 PE=1 SV=1	55	15	24.8	1.27724e+07	4.03099e+07	0.316856
High	Master Protein	Q8R2P8	Lysine--tRNA ligase OS=Mus musculus OX=10090 GN=Kars PE=1 SV=1	34	23	71.2	1.26621e+07	4.00683e+07	0.316012
High	Master Protein	P70303	CTP synthase 2 OS=Mus musculus OX=10090 GN=Ctps2 PE=1 SV=1	34	21	65.5	1.2471e+07	3.94687e+07	0.315972
High	Master Protein	Q3TIX6	Far upstream element (FUSE)-binding protein 3 OS=Mus musculus OX=10090 GN=Fubp3 PE=1 SV=1	57	37	61.9	1.23699e+07	3.64077e+07	0.33976
High	Master Protein	Q497V5	S1 RNA-binding domain-containing protein 1 OS=Mus musculus OX=10090 GN=Srbd1 PE=2 SV=2	5	10	114	1.23147e+07	1.15147e+07	1.06948
High	Master Protein	E9QAS5	Chromodomain-helicase-DNA-binding protein 4 OS=Mus musculus OX=10090 GN=Chd4 PE=1 SV=1	22	42	218.5	1.22884e+07	5.86358e+07	0.209572
High	Master Protein	Q6P1J1	Crmp1 protein OS=Mus musculus OX=10090 GN=Crmp1 PE=1 SV=1	35	25	74.2	1.22664e+07	3.14512e+07	0.390014
High	Master Protein	Q8BTM8	Filamin-A OS=Mus musculus OX=10090 GN=Flna PE=1 SV=5	19	51	281	1.22605e+07	3.92236e+07	0.31258
High	Master Protein	Q8BMJ2	Leucine--tRNA ligase, cytoplasmic OS=Mus musculus OX=10090 GN=Lars PE=1 SV=2	26	35	134.1	1.22309e+07	5.02362e+07	0.243467
High	Master Protein	Q60848	Lymphocyte-specific helicase OS=Mus musculus OX=10090 GN=Hells PE=1 SV=2	12	10	95.1	1.21955e+07	6.08014e+06	2.0058
High	Master Protein	P61957	Small ubiquitin-related modifier 2 OS=Mus musculus OX=10090 GN=Sumo2 PE=1 SV=1	27	6	10.9	1.21296e+07	61619244	0.196848
High	Master Protein	Q7TMK9	Heterogeneous nuclear ribonucleoprotein Q OS=Mus musculus OX=10090 GN=Syncrip PE=1 SV=2	31	28	69.6	1.21281e+07	3.28947e+07	0.368695
High	Master Protein	Q6GQT9	Nodal modulator 1 OS=Mus musculus OX=10090 GN=Nomo1 PE=1 SV=1	19	27	133.3	1.21206e+07	3.39039e+07	0.3575
High	Master Protein	P28271	Cytoplasmic aconitate hydratase OS=Mus musculus OX=10090 GN=Aco1 PE=1 SV=3	24	23	98.1	1.20981e+07	3.17757e+07	0.380733
High	Master Protein	Q9DBG3	AP-2 complex subunit beta OS=Mus musculus OX=10090 GN=Ap2b1 PE=1 SV=1	31	43	104.5	1.20908e+07	3.57015e+07	0.338665
High	Master Protein	B1AXZ5	ELAV-like protein OS=Mus musculus OX=10090 GN=Elavl2 PE=1 SV=1	33	18	42.6	1.20714e+07	3.8046e+07	0.317284
High	Master Protein	Q8BFR5	Elongation factor Tu, mitochondrial OS=Mus musculus OX=10090 GN=Tufm PE=1 SV=1	25	14	49.5	1.20035e+07	4.10199e+07	0.292626
High	Master Protein	P47738	Aldehyde dehydrogenase, mitochondrial OS=Mus musculus OX=10090 GN=Aldh2 PE=1 SV=1	43	43	56.5	1.18965e+07	3.80506e+07	0.312649
High	Master Protein	E9QB02	Methionine--tRNA ligase, cytoplasmic OS=Mus musculus OX=10090 GN=Mars PE=1 SV=1	20	26	102.3	1.1837e+07	3.42581e+07	0.345524
High	Master Protein	Q8VDJ3	Vigilin OS=Mus musculus OX=10090 GN=Hdlbp PE=1 SV=1	30	42	141.7	1.17572e+07	4.56124e+07	0.257763
High	Master Protein	P37040	NADPH--cytochrome P450 reductase OS=Mus musculus OX=10090 GN=Por PE=1 SV=2	24	19	77	1.1729e+07	4.70836e+07	0.24911
High	Master Protein	Q9Z2U0	Proteasome subunit alpha type-7 OS=Mus musculus OX=10090 GN=Psma7 PE=1 SV=1	50	16	27.8	1.17173e+07	4.99312e+07	0.23467
High	Master Protein	P50580	Proliferation-associated protein 2G4 OS=Mus musculus OX=10090 GN=Pa2g4 PE=1 SV=3	31	22	43.7	1.16658e+07	4.38047e+07	0.266314
High	Master Protein	Q8BWF0	Succinate-semialdehyde dehydrogenase, mitochondrial OS=Mus musculus OX=10090 GN=Aldh5a1 PE=1 SV=1	41	19	55.9	1.16418e+07	2.02905e+07	0.573759
High	Master Protein	Q9Z1A1	TFG protein OS=Mus musculus OX=10090 GN=Tfg PE=1 SV=1	35	20	43	1.16215e+07	3.26848e+07	0.355562
High	Master Protein	H9KV00	Protein SON OS=Mus musculus OX=10090 GN=Son PE=1 SV=1	14	54	268.7	1.16059e+07	9.07656e+07	0.127867
High	Master Protein	P14206	40S ribosomal protein SA OS=Mus musculus OX=10090 GN=Rpsa PE=1 SV=4	31	12	32.8	1.16023e+07	3.87659e+07	0.299292
High	Master Protein	E9Q9C3	Afadin OS=Mus musculus OX=10090 GN=Afdn PE=1 SV=1	22	46	207.2	1.15614e+07	4.25358e+07	0.271804
High	Master Protein	Q9D0R2	Threonine--tRNA ligase, cytoplasmic OS=Mus musculus OX=10090 GN=Tars PE=1 SV=2	31	26	83.3	1.15613e+07	3.28242e+07	0.352218
High	Master Protein	P62852	40S ribosomal protein S25 OS=Mus musculus OX=10090 GN=Rps25 PE=1 SV=1	30	8	13.7	1.15385e+07	5.00363e+07	0.230602
High	Master Protein	Q8K0T0	Reticulon-1 OS=Mus musculus OX=10090 GN=Rtn1 PE=1 SV=1	18	11	83.5	1.15131e+07	1.54323e+07	0.746041
High	Master Protein	P27546	Microtubule-associated protein 4 OS=Mus musculus OX=10090 GN=Map4 PE=1 SV=3	44	51	117.4	1.14711e+07	6.25597e+07	0.183362
High	Master Protein	Q91YQ5	Dolichyl-diphosphooligosaccharide--protein glycosyltransferase subunit 1 OS=Mus musculus OX=10090 GN=Rpn1 PE=1 SV=1	35	25	68.5	1.14141e+07	3.85e+07	0.296469
High	Master Protein	P68040	Receptor of activated protein C kinase 1 OS=Mus musculus OX=10090 GN=Rack1 PE=1 SV=3	49	16	35.1	1.1412e+07	3.34144e+07	0.341529
High	Master Protein	Q9WUA2	Phenylalanine--tRNA ligase beta subunit OS=Mus musculus OX=10090 GN=Farsb PE=1 SV=2	26	23	65.7	1.13541e+07	3.04786e+07	0.372528
High	Master Protein	Q8R050	Eukaryotic peptide chain release factor GTP-binding subunit ERF3A OS=Mus musculus OX=10090 GN=Gspt1 PE=1 SV=2	30	19	68.6	1.13421e+07	2.59835e+07	0.436511
High	Master Protein	Q99PV0	Pre-mRNA-processing-splicing factor 8 OS=Mus musculus OX=10090 GN=Prpf8 PE=1 SV=2	18	44	273.4	1.13181e+07	4.13344e+07	0.273819
High	Master Protein	Q9CU62	Structural maintenance of chromosomes protein 1A OS=Mus musculus OX=10090 GN=Smc1a PE=1 SV=4	27	41	143.1	1.11929e+07	4.43065e+07	0.252625
High	Master Protein	Q9WVJ2	26S proteasome non-ATPase regulatory subunit 13 OS=Mus musculus OX=10090 GN=Psmd13 PE=1 SV=1	15	9	42.8	1.11762e+07	1.08827e+07	1.02698
High	Master Protein	Q9Z110	Delta-1-pyrroline-5-carboxylate synthase OS=Mus musculus OX=10090 GN=Aldh18a1 PE=1 SV=2	26	29	87.2	1.1011e+07	2.79537e+07	0.393901
High	Master Protein	Q8JZK9	Hydroxymethylglutaryl-CoA synthase, cytoplasmic OS=Mus musculus OX=10090 GN=Hmgcs1 PE=1 SV=1	28	19	57.5	1.09956e+07	3.37202e+07	0.326084
High	Master Protein	Q99020	Heterogeneous nuclear ribonucleoprotein A/B OS=Mus musculus OX=10090 GN=Hnrnpab PE=1 SV=1	46	32	30.8	1.09894e+07	6.94009e+07	0.158346
High	Master Protein	Q5SUR0	Phosphoribosylformylglycinamidine synthase OS=Mus musculus OX=10090 GN=Pfas PE=1 SV=1	12	17	144.5	1.09781e+07	1.63293e+07	0.672292
High	Master Protein	Q8R1F1	Niban-like protein 1 OS=Mus musculus OX=10090 GN=Fam129b PE=1 SV=2	37	26	84.8	1.09507e+07	2.84623e+07	0.384745
High	Master Protein	Q6NV83	U2 snRNP-associated SURP motif-containing protein OS=Mus musculus OX=10090 GN=U2surp PE=1 SV=3	28	33	118.2	1.09214e+07	6.1245e+07	0.178323
High	Master Protein	P15864	Histone H1.2 OS=Mus musculus OX=10090 GN=Hist1h1c PE=1 SV=2	36	14	21.3	1.08645e+07	7.96046e+07	0.13648
High	Master Protein	Q9JLQ0	CD2-associated protein OS=Mus musculus OX=10090 GN=Cd2ap PE=1 SV=3	32	22	70.4	1.08216e+07	4.39766e+07	0.246077
High	Master Protein	O55201	Transcription elongation factor SPT5 OS=Mus musculus OX=10090 GN=Supt5h PE=1 SV=1	24	30	120.6	1.08184e+07	3.57458e+07	0.302649
High	Master Protein	P14094	Sodium/potassium-transporting ATPase subunit beta-1 OS=Mus musculus OX=10090 GN=Atp1b1 PE=1 SV=1	28	12	35.2	1.08008e+07	3.43234e+07	0.314676
High	Master Protein	H7BX95	Serine/arginine-rich-splicing factor 1 OS=Mus musculus OX=10090 GN=Srsf1 PE=1 SV=1	49	27	28.3	1.07729e+07	6.09147e+07	0.176853
High	Master Protein	Q9Z1G3	V-type proton ATPase subunit C 1 OS=Mus musculus OX=10090 GN=Atp6v1c1 PE=1 SV=4	49	22	43.9	1.07338e+07	3.74461e+07	0.286646
High	Master Protein	Q8BKZ9	Pyruvate dehydrogenase protein X component, mitochondrial OS=Mus musculus OX=10090 GN=Pdhx PE=1 SV=1	26	17	54	1.07246e+07	4.01116e+07	0.267369
High	Master Protein	P17427	AP-2 complex subunit alpha-2 OS=Mus musculus OX=10090 GN=Ap2a2 PE=1 SV=2	23	23	104	1.06508e+07	2.79214e+07	0.381458
High	Master Protein	Q62277	Synaptophysin OS=Mus musculus OX=10090 GN=Syp PE=1 SV=2	9	8	34	1.06376e+07	2.44735e+07	0.434658
High	Master Protein	O35381	Acidic leucine-rich nuclear phosphoprotein 32 family member A OS=Mus musculus OX=10090 GN=Anp32a PE=1 SV=1	30	12	28.5	1.05527e+07	3.9697e+07	0.265832
High	Master Protein	P62827	GTP-binding nuclear protein Ran OS=Mus musculus OX=10090 GN=Ran PE=1 SV=3	31	9	24.4	1.05214e+07	3.20154e+07	0.328636
High	Master Protein	P53994	Ras-related protein Rab-2A OS=Mus musculus OX=10090 GN=Rab2a PE=1 SV=1	45	12	23.5	1.0449e+07	2.18785e+07	0.477595
High	Master Protein	G3X956	Suppressor of Ty 16 OS=Mus musculus OX=10090 GN=Supt16 PE=1 SV=1	30	36	119.8	1.04487e+07	4.96232e+07	0.21056
High	Master Protein	Q60865	Caprin-1 OS=Mus musculus OX=10090 GN=Caprin1 PE=1 SV=2	28	20	78.1	1.04275e+07	3.55236e+07	0.293536
High	Master Protein	P70698	CTP synthase 1 OS=Mus musculus OX=10090 GN=Ctps1 PE=1 SV=2	35	22	66.6	1.03905e+07	3.5734e+07	0.290774
High	Master Protein	Q00612	Glucose-6-phosphate 1-dehydrogenase X OS=Mus musculus OX=10090 GN=G6pdx PE=1 SV=3	43	32	59.2	1.03895e+07	3.96133e+07	0.262274
High	Master Protein	E9PYV1	Glucocorticoid receptor OS=Mus musculus OX=10090 GN=Nr3c1 PE=1 SV=1	15	13	87.3	1.03438e+07	3.47251e+06	2.97877
High	Master Protein	Q6A0A9	Constitutive coactivator of PPAR-gamma-like protein 1 OS=Mus musculus OX=10090 GN=FAM120A PE=1 SV=2	25	26	121.6	1.03434e+07	3.48555e+07	0.29675
High	Master Protein	P46460	Vesicle-fusing ATPase OS=Mus musculus OX=10090 GN=Nsf PE=1 SV=2	29	29	82.6	1.02782e+07	3.61897e+07	0.28401
High	Master Protein	P45376	Aldose reductase OS=Mus musculus OX=10090 GN=Akr1b1 PE=1 SV=3	30	12	35.7	1.02703e+07	3.06748e+07	0.334812
High	Master Protein	A0A1B0GSX7	Nuclear pore complex protein Nup98-Nup96 OS=Mus musculus OX=10090 GN=Nup98 PE=1 SV=1	16	27	197.2	1.02617e+07	5.00703e+07	0.204946
High	Master Protein	Q99K48	Non-POU domain-containing octamer-binding protein OS=Mus musculus OX=10090 GN=Nono PE=1 SV=3	47	43	54.5	1.02396e+07	5.64886e+07	0.181268
High	Master Protein	P70333	Heterogeneous nuclear ribonucleoprotein H2 OS=Mus musculus OX=10090 GN=Hnrnph2 PE=1 SV=1	44	48	49.2	1.02389e+07	2.87331e+07	0.356346
High	Master Protein	P50518	V-type proton ATPase subunit E 1 OS=Mus musculus OX=10090 GN=Atp6v1e1 PE=1 SV=2	46	14	26.1	1.01278e+07	3.59996e+07	0.281329
High	Master Protein	P23116	Eukaryotic translation initiation factor 3 subunit A OS=Mus musculus OX=10090 GN=Eif3a PE=1 SV=5	16	26	161.8	1.01097e+07	3.89607e+07	0.259485
High	Master Protein	Q9DCH4	Eukaryotic translation initiation factor 3 subunit F OS=Mus musculus OX=10090 GN=Eif3f PE=1 SV=2	39	22	38	1.00929e+07	3.5839e+07	0.281617
High	Master Protein	O54734	Dolichyl-diphosphooligosaccharide--protein glycosyltransferase 48 kDa subunit OS=Mus musculus OX=10090 GN=Ddost PE=1 SV=2	22	11	49	1.00916e+07	26158037	0.385793
High	Master Protein	A0A2I3BQV5	Exportin-7 OS=Mus musculus OX=10090 GN=Xpo7 PE=1 SV=1	24	27	123.9	1.0051e+07	2.21624e+07	0.453518
High	Master Protein	Q6R0H7	Guanine nucleotide-binding protein G(s) subunit alpha isoforms XLas OS=Mus musculus OX=10090 GN=Gnas PE=1 SV=1	13	18	121.4	1.00263e+07	3.6068e+07	0.277982
High	Master Protein	Q6DFW4	Nucleolar protein 58 OS=Mus musculus OX=10090 GN=Nop58 PE=1 SV=1	42	28	60.3	9.98196e+06	4.71952e+07	0.211504
High	Master Protein	Q3UHU8	General transcription factor II-I OS=Mus musculus OX=10090 GN=Gtf2i PE=1 SV=1	23	21	108.3	9.96349e+06	3.90584e+07	0.255092
High	Master Protein	Q61937	Nucleophosmin OS=Mus musculus OX=10090 GN=Npm1 PE=1 SV=1	36	16	32.5	9.94089e+06	6.36037e+07	0.156294
High	Master Protein	P14873	Microtubule-associated protein 1B OS=Mus musculus OX=10090 GN=Map1b PE=1 SV=2	27	56	270.1	9.89994e+06	4.29333e+07	0.230589
High	Master Protein	B2RXT3	Ogdhl protein OS=Mus musculus OX=10090 GN=Ogdhl PE=1 SV=1	26	30	114.5	9.87348e+06	2.77946e+07	0.355231
High	Master Protein	Q9EPL8	Importin-7 OS=Mus musculus OX=10090 GN=Ipo7 PE=1 SV=2	20	22	119.4	9.86998e+06	2.52993e+07	0.390129
High	Master Protein	E9Q1G8	Septin-7 OS=Mus musculus OX=10090 GN=Sept7 PE=1 SV=2	31	22	50.6	9.86927e+06	4.89921e+07	0.201446
High	Master Protein	Q62261	Spectrin beta chain, non-erythrocytic 1 OS=Mus musculus OX=10090 GN=Sptbn1 PE=1 SV=2	16	34	274.1	9.85821e+06	2.9663e+07	0.33234
High	Master Protein	P97351	40S ribosomal protein S3a OS=Mus musculus OX=10090 GN=Rps3a PE=1 SV=3	47	18	29.9	9.78135e+06	3.94446e+07	0.247977
High	Master Protein	Q8CBB7	AP-1 complex subunit gamma-1 OS=Mus musculus OX=10090 GN=Ap1g1 PE=1 SV=1	23	21	91.7	9.7809e+06	2.57958e+07	0.379166
High	Master Protein	P59017	Bcl-2-like protein 13 OS=Mus musculus OX=10090 GN=Bcl2l13 PE=1 SV=2	25	13	46.7	9777717	3.09608e+07	0.31581
High	Master Protein	D3Z0M9	DEAD (Asp-Glu-Ala-Asp) box polypeptide 23 OS=Mus musculus OX=10090 GN=Ddx23 PE=1 SV=1	19	18	95.4	9.75441e+06	30324902	0.321663
High	Master Protein	P61222	ATP-binding cassette sub-family E member 1 OS=Mus musculus OX=10090 GN=Abce1 PE=1 SV=1	35	26	67.3	9.75246e+06	3.31511e+07	0.294183
High	Master Protein	Q9QXK3	Coatomer subunit gamma-2 OS=Mus musculus OX=10090 GN=Copg2 PE=1 SV=1	23	26	97.6	9.74624e+06	3.37562e+07	0.288724
High	Master Protein	Q64674	Spermidine synthase OS=Mus musculus OX=10090 GN=Srm PE=1 SV=1	35	15	34	9.72871e+06	3.03584e+07	0.320461
High	Master Protein	P35979	60S ribosomal protein L12 OS=Mus musculus OX=10090 GN=Rpl12 PE=1 SV=2	38	7	17.8	9.69924e+06	2.67729e+07	0.362279
High	Master Protein	P26369	Splicing factor U2AF 65 kDa subunit OS=Mus musculus OX=10090 GN=U2af2 PE=1 SV=3	39	21	53.5	9.67781e+06	3.5971e+07	0.269045
High	Master Protein	Q8VCT3	Aminopeptidase B OS=Mus musculus OX=10090 GN=Rnpep PE=1 SV=2	27	23	72.4	9.65407e+06	3.00583e+07	0.321178
High	Master Protein	Q6ZWX6	Eukaryotic translation initiation factor 2 subunit 1 OS=Mus musculus OX=10090 GN=Eif2s1 PE=1 SV=3	56	23	36.1	9.60522e+06	2.62387e+07	0.366071
High	Master Protein	Q3TIU4	2',5'-phosphodiesterase 12 OS=Mus musculus OX=10090 GN=Pde12 PE=1 SV=2	10	7	67.5	9.58707e+06	4901431	1.95597
High	Master Protein	O08807	Peroxiredoxin-4 OS=Mus musculus OX=10090 GN=Prdx4 PE=1 SV=1	36	21	31	9.5719e+06	2.61588e+07	0.365914
High	Master Protein	Q8QZY1	Eukaryotic translation initiation factor 3 subunit L OS=Mus musculus OX=10090 GN=Eif3l PE=1 SV=1	32	23	66.6	9.54146e+06	2.84607e+07	0.33525
High	Master Protein	P62855	40S ribosomal protein S26 OS=Mus musculus OX=10090 GN=Rps26 PE=1 SV=3	34	5	13	9.53917e+06	24025272	0.397047
High	Master Protein	Q61941	NAD(P) transhydrogenase, mitochondrial OS=Mus musculus OX=10090 GN=Nnt PE=1 SV=2	20	23	113.8	9.50588e+06	2.80421e+07	0.338986
High	Master Protein	O55029	Coatomer subunit beta' OS=Mus musculus OX=10090 GN=Copb2 PE=1 SV=2	29	27	102.4	9.42247e+06	2.97662e+07	0.316549
High	Master Protein	Q8K0G8	Epithelial splicing regulatory protein 2 OS=Mus musculus OX=10090 GN=Esrp2 PE=1 SV=1	17	17	77.3	9.36758e+06	1.88441e+07	0.49711
High	Master Protein	A0A1B0GR11	Transaldolase OS=Mus musculus OX=10090 GN=Taldo1 PE=1 SV=1	29	15	42.1	9.33399e+06	2.87686e+07	0.32445
High	Master Protein	Q922Q8	Leucine-rich repeat-containing protein 59 OS=Mus musculus OX=10090 GN=Lrrc59 PE=1 SV=1	43	13	34.9	9.32978e+06	4.27585e+07	0.218197
High	Master Protein	Q3UH59	Myosin-10 OS=Mus musculus OX=10090 GN=Myh10 PE=1 SV=1	31	63	233.3	9.32874e+06	4.62671e+07	0.201628
High	Master Protein	P97429	Annexin A4 OS=Mus musculus OX=10090 GN=Anxa4 PE=1 SV=4	48	19	35.9	9.31328e+06	2.50992e+07	0.37106
High	Master Protein	Q8R1B4	Eukaryotic translation initiation factor 3 subunit C OS=Mus musculus OX=10090 GN=Eif3c PE=1 SV=1	22	31	105.5	9.24811e+06	4.03568e+07	0.229158
High	Master Protein	Q921K2	Poly [ADP-ribose] polymerase OS=Mus musculus OX=10090 GN=Parp1 PE=1 SV=1	25	29	112.7	9.19612e+06	4.04729e+07	0.227217
High	Master Protein	P18760	Cofilin-1 OS=Mus musculus OX=10090 GN=Cfl1 PE=1 SV=3	62	16	18.5	9.09515e+06	3.52847e+07	0.257765
High	Master Protein	Q9D2G2	Dihydrolipoyllysine-residue succinyltransferase component of 2-oxoglutarate dehydrogenase complex, mitochondrial OS=Mus musculus OX=10090 GN=Dlst PE=1 SV=1	21	19	49	9.04685e+06	2.74741e+07	0.329286
High	Master Protein	Q8VH51	RNA-binding protein 39 OS=Mus musculus OX=10090 GN=Rbm39 PE=1 SV=2	21	14	59.4	9.02131e+06	2.95081e+07	0.305724
High	Master Protein	Q8BMK4	Cytoskeleton-associated protein 4 OS=Mus musculus OX=10090 GN=Ckap4 PE=1 SV=2	24	20	63.7	8.88121e+06	9.38846e+06	0.94597
High	Master Protein	P11440	Cyclin-dependent kinase 1 OS=Mus musculus OX=10090 GN=Cdk1 PE=1 SV=3	39	14	34.1	8.8791e+06	2.25571e+07	0.393627
High	Master Protein	Q9DCL9	Multifunctional protein ADE2 OS=Mus musculus OX=10090 GN=Paics PE=1 SV=4	34	23	47	8.83621e+06	3.22754e+07	0.273775
High	Master Protein	P70699	Lysosomal alpha-glucosidase OS=Mus musculus OX=10090 GN=Gaa PE=1 SV=2	19	20	106.2	8.83319e+06	1.90755e+07	0.463066
High	Master Protein	E9PV22	Leucine-rich repeat-containing protein 47 OS=Mus musculus OX=10090 GN=Lrrc47 PE=1 SV=1	31	21	65.9	8.80954e+06	2.77858e+07	0.317052
High	Master Protein	P62242	40S ribosomal protein S8 OS=Mus musculus OX=10090 GN=Rps8 PE=1 SV=2	33	14	24.2	8.8039e+06	5.00204e+07	0.176006
High	Master Protein	Q9WVA3	Mitotic checkpoint protein BUB3 OS=Mus musculus OX=10090 GN=Bub3 PE=1 SV=2	41	19	36.9	8.74511e+06	2.80472e+07	0.3118
High	Master Protein	Q9WUK2	Eukaryotic translation initiation factor 4H OS=Mus musculus OX=10090 GN=Eif4h PE=1 SV=3	24	9	27.3	8.72632e+06	3.96041e+07	0.220339
High	Master Protein	O08749	Dihydrolipoyl dehydrogenase, mitochondrial OS=Mus musculus OX=10090 GN=Dld PE=1 SV=2	17	13	54.2	8.70217e+06	3.72867e+07	0.233385
High	Master Protein	A0A1L1STE6	Isocitrate dehydrogenase [NAD] subunit, mitochondrial OS=Mus musculus OX=10090 GN=Idh3a PE=1 SV=1	34	20	41.5	8.64787e+06	2.81204e+07	0.30753
High	Master Protein	Q9WV80	Sorting nexin-1 OS=Mus musculus OX=10090 GN=Snx1 PE=1 SV=1	31	24	58.9	8.6281e+06	3.28156e+07	0.262927
High	Master Protein	Q8CG48	Structural maintenance of chromosomes protein 2 OS=Mus musculus OX=10090 GN=Smc2 PE=1 SV=2	27	35	134.2	8.62234e+06	3.80857e+07	0.226393
High	Master Protein	A0A0R4J0G0	Phosphoenolpyruvate carboxykinase [GTP], mitochondrial OS=Mus musculus OX=10090 GN=Pck2 PE=1 SV=1	27	18	73.4	8.53012e+06	1.61802e+07	0.527194
High	Master Protein	Q9JMA1	Ubiquitin carboxyl-terminal hydrolase 14 OS=Mus musculus OX=10090 GN=Usp14 PE=1 SV=3	26	16	56	8.46911e+06	3.13699e+07	0.269976
High	Master Protein	P97384	Annexin A11 OS=Mus musculus OX=10090 GN=Anxa11 PE=1 SV=2	21	16	54	8.42126e+06	2.50769e+07	0.335817
High	Master Protein	Q61035	Histidine--tRNA ligase, cytoplasmic OS=Mus musculus OX=10090 GN=Hars PE=1 SV=2	21	14	57.4	8.37715e+06	2.91829e+07	0.287057
High	Master Protein	Q8BFY9	Transportin-1 OS=Mus musculus OX=10090 GN=Tnpo1 PE=1 SV=2	21	21	102.3	8.34991e+06	2.26599e+07	0.368489
High	Master Protein	Q9ES97	Reticulon-3 OS=Mus musculus OX=10090 GN=Rtn3 PE=1 SV=2	3	5	103.8	8.30912e+06	1.10122e+07	0.754537
High	Master Protein	Q8CD76	Kinesin light chain 1 OS=Mus musculus OX=10090 GN=Klc1 PE=1 SV=1	29	20	69.5	8.30134e+06	35209441	0.23577
High	Master Protein	P63328	Serine/threonine-protein phosphatase 2B catalytic subunit alpha isoform OS=Mus musculus OX=10090 GN=Ppp3ca PE=1 SV=1	31	22	58.6	8.26974e+06	3.32793e+07	0.248495
High	Master Protein	Q8BZ98	Dynamin-3 OS=Mus musculus OX=10090 GN=Dnm3 PE=1 SV=1	37	30	97.1	8.26155e+06	2.83171e+07	0.291752
High	Master Protein	A0A0R4J034	MCG129810, isoform CRA_c OS=Mus musculus OX=10090 GN=Pdxdc1 PE=1 SV=1	21	21	87.4	8.26029e+06	2.8262e+07	0.292276
High	Master Protein	P47963	60S ribosomal protein L13 OS=Mus musculus OX=10090 GN=Rpl13 PE=1 SV=3	34	12	24.3	8.24074e+06	6.72593e+07	0.122522
High	Master Protein	Q9CPY7	Cytosol aminopeptidase OS=Mus musculus OX=10090 GN=Lap3 PE=1 SV=3	35	17	56.1	8.23188e+06	2.3919e+07	0.344157
High	Master Protein	Q6P5D8	Structural maintenance of chromosomes flexible hinge domain-containing protein 1 OS=Mus musculus OX=10090 GN=Smchd1 PE=1 SV=2	15	26	225.5	8.19023e+06	2.40943e+07	0.339924
High	Master Protein	O88508	DNA (cytosine-5)-methyltransferase 3A OS=Mus musculus OX=10090 GN=Dnmt3a PE=1 SV=2	24	20	101.6	8.16701e+06	1.29859e+07	0.628914
High	Master Protein	P62196	26S proteasome regulatory subunit 8 OS=Mus musculus OX=10090 GN=Psmc5 PE=1 SV=1	45	24	45.6	8.15317e+06	2.89803e+07	0.281335
High	Master Protein	Q9D1G1	Ras-related protein Rab-1B OS=Mus musculus OX=10090 GN=Rab1b PE=1 SV=1	68	15	22.2	8.12611e+06	2.43313e+07	0.333977
High	Master Protein	H7BX01	Dynamin-like 120 kDa protein, mitochondrial OS=Mus musculus OX=10090 GN=Opa1 PE=1 SV=1	22	21	113.2	8.09401e+06	2.45469e+07	0.329737
High	Master Protein	Q9JLV5	Cullin-3 OS=Mus musculus OX=10090 GN=Cul3 PE=1 SV=1	26	25	88.9	8.01062e+06	2.78865e+07	0.287258
High	Master Protein	A2ADY9	Protein DDI1 homolog 2 OS=Mus musculus OX=10090 GN=Ddi2 PE=1 SV=1	39	17	44.6	8.0036e+06	3.12822e+07	0.255851
High	Master Protein	Q9WVA4	Transgelin-2 OS=Mus musculus OX=10090 GN=Tagln2 PE=1 SV=4	54	23	22.4	7.95695e+06	2.7505e+07	0.289291
High	Master Protein	P39054	Dynamin-2 OS=Mus musculus OX=10090 GN=Dnm2 PE=1 SV=2	32	34	98.1	7.95209e+06	2.21331e+07	0.359285
High	Master Protein	Q9CW03	Structural maintenance of chromosomes protein 3 OS=Mus musculus OX=10090 GN=Smc3 PE=1 SV=2	25	31	141.5	7.95076e+06	3.45982e+07	0.229803
High	Master Protein	Q80UM7	Mannosyl-oligosaccharide glucosidase OS=Mus musculus OX=10090 GN=Mogs PE=1 SV=1	18	19	91.8	7.92152e+06	2.74015e+07	0.289091
High	Master Protein	O08599	Syntaxin-binding protein 1 OS=Mus musculus OX=10090 GN=Stxbp1 PE=1 SV=2	27	20	67.5	7.90088e+06	2.23323e+07	0.353788
High	Master Protein	Q924C1	Exportin-5 OS=Mus musculus OX=10090 GN=Xpo5 PE=1 SV=1	12	19	136.9	7.89058e+06	1.40538e+07	0.561453
High	Master Protein	P26039	Talin-1 OS=Mus musculus OX=10090 GN=Tln1 PE=1 SV=2	16	35	269.7	7.85005e+06	2.25129e+07	0.348691
High	Master Protein	P70372	ELAV-like protein 1 OS=Mus musculus OX=10090 GN=Elavl1 PE=1 SV=2	16	9	36.1	7.84012e+06	1.65106e+07	0.474853
High	Master Protein	P48036	Annexin A5 OS=Mus musculus OX=10090 GN=Anxa5 PE=1 SV=1	43	18	35.7	7.83013e+06	2.85253e+07	0.274497
High	Master Protein	A0A0U1RPL0	Ataxin-2-like protein OS=Mus musculus OX=10090 GN=Atxn2l PE=1 SV=1	22	19	115.2	7.82578e+06	2.71253e+07	0.288504
High	Master Protein	Q9CQN1	Heat shock protein 75 kDa, mitochondrial OS=Mus musculus OX=10090 GN=Trap1 PE=1 SV=1	37	31	80.2	7.81888e+06	2.85983e+07	0.273404
High	Master Protein	Q99KK9	Probable histidine--tRNA ligase, mitochondrial OS=Mus musculus OX=10090 GN=Hars2 PE=1 SV=1	10	7	56.9	7.80087e+06	2.11377e+07	0.36905
High	Master Protein	S4R1M2	Scaffold attachment factor B1 OS=Mus musculus OX=10090 GN=Safb PE=1 SV=1	25	26	105.3	7.77622e+06	3.48617e+07	0.223059
High	Master Protein	Q9JIF0	Protein arginine N-methyltransferase 1 OS=Mus musculus OX=10090 GN=Prmt1 PE=1 SV=1	32	15	42.4	7.74349e+06	1.85826e+07	0.416706
High	Master Protein	P84091	AP-2 complex subunit mu OS=Mus musculus OX=10090 GN=Ap2m1 PE=1 SV=1	28	16	49.6	7.71901e+06	3.14556e+07	0.245394
High	Master Protein	Q9CR62	Mitochondrial 2-oxoglutarate/malate carrier protein OS=Mus musculus OX=10090 GN=Slc25a11 PE=1 SV=3	47	18	34.1	7.71642e+06	1.80436e+07	0.427654
High	Master Protein	O08529	Calpain-2 catalytic subunit OS=Mus musculus OX=10090 GN=Capn2 PE=1 SV=4	33	30	79.8	7.69142e+06	2.78628e+07	0.276047
High	Master Protein	Q60854	Serpin B6 OS=Mus musculus OX=10090 GN=Serpinb6 PE=1 SV=1	32	19	42.6	7.67396e+06	2.3704e+07	0.323741
High	Master Protein	O54774	AP-3 complex subunit delta-1 OS=Mus musculus OX=10090 GN=Ap3d1 PE=1 SV=1	21	22	135	7.5897e+06	3.56475e+07	0.21291
High	Master Protein	Q99JX7	Nuclear RNA export factor 1 OS=Mus musculus OX=10090 GN=Nxf1 PE=1 SV=3	24	13	70.3	7.5883e+06	2.04514e+07	0.37104
High	Master Protein	O08759	Ubiquitin-protein ligase E3A OS=Mus musculus OX=10090 GN=Ube3a PE=1 SV=2	23	25	99.8	7.56982e+06	2.5728e+07	0.294225
High	Master Protein	P27612	Phospholipase A-2-activating protein OS=Mus musculus OX=10090 GN=Plaa PE=1 SV=4	26	23	87.2	7556314	2.23966e+07	0.337386
High	Master Protein	A0A1L1SRJ4	Tetraspanin OS=Mus musculus OX=10090 GN=Tspan3 PE=1 SV=1	6	3	28.3	7.5383e+06	1.27189e+07	0.592684
High	Master Protein	A0A1W2P7Q9	Myosin light polypeptide 6 OS=Mus musculus OX=10090 GN=Myl6 PE=1 SV=1	39	10	17.7	7.50878e+06	1.4953e+07	0.50216
High	Master Protein	Q8CDN6	Thioredoxin-like protein 1 OS=Mus musculus OX=10090 GN=Txnl1 PE=1 SV=3	51	14	32.2	7.49733e+06	2.43042e+07	0.308478
High	Master Protein	P84104	Serine/arginine-rich splicing factor 3 OS=Mus musculus OX=10090 GN=Srsf3 PE=1 SV=1	26	7	19.3	7.47468e+06	3.20277e+07	0.233382
High	Master Protein	P99026	Proteasome subunit beta type-4 OS=Mus musculus OX=10090 GN=Psmb4 PE=1 SV=1	36	12	29.1	7.42385e+06	1.74988e+07	0.424249
High	Master Protein	A2AUC9	Kelch-like protein 41 OS=Mus musculus OX=10090 GN=Klhl41 PE=1 SV=1	16	12	68.1	7.41295e+06	1.35264e+07	0.548037
High	Master Protein	Q9DB77	Cytochrome b-c1 complex subunit 2, mitochondrial OS=Mus musculus OX=10090 GN=Uqcrc2 PE=1 SV=1	40	16	48.2	7.41142e+06	27156590	0.272914
High	Master Protein	O09106	Histone deacetylase 1 OS=Mus musculus OX=10090 GN=Hdac1 PE=1 SV=1	26	16	55	7.38991e+06	2.11226e+07	0.349858
High	Master Protein	Q99MR6	Serrate RNA effector molecule homolog OS=Mus musculus OX=10090 GN=Srrt PE=1 SV=1	18	26	100.4	7.36547e+06	3.58329e+07	0.205551
High	Master Protein	Q8JZQ9	Eukaryotic translation initiation factor 3 subunit B OS=Mus musculus OX=10090 GN=Eif3b PE=1 SV=1	34	28	91.3	7.32692e+06	2.89301e+07	0.253263
High	Master Protein	P16460	Argininosuccinate synthase OS=Mus musculus OX=10090 GN=Ass1 PE=1 SV=1	20	13	46.6	7.29468e+06	2.72135e+07	0.268053
High	Master Protein	P13439	Uridine 5'-monophosphate synthase OS=Mus musculus OX=10090 GN=Umps PE=1 SV=3	35	18	52.3	7.28857e+06	25240883	0.288761
High	Master Protein	P26443	Glutamate dehydrogenase 1, mitochondrial OS=Mus musculus OX=10090 GN=Glud1 PE=1 SV=1	25	17	61.3	7.23778e+06	3.23798e+07	0.223528
High	Master Protein	Q7TMM9	Tubulin beta-2A chain OS=Mus musculus OX=10090 GN=Tubb2a PE=1 SV=1	73	781	49.9	7.23253e+06	1.35613e+06	5.33321
High	Master Protein	O35841	Apoptosis inhibitor 5 OS=Mus musculus OX=10090 GN=Api5 PE=1 SV=2	29	15	56.8	7.18014e+06	2.42876e+07	0.29563
High	Master Protein	Q9R1P0	Proteasome subunit alpha type-4 OS=Mus musculus OX=10090 GN=Psma4 PE=1 SV=1	34	16	29.5	7.13607e+06	2.29067e+07	0.311527
High	Master Protein	P61164	Alpha-centractin OS=Mus musculus OX=10090 GN=Actr1a PE=1 SV=1	38	14	42.6	7.09361e+06	3.9282e+07	0.180581
High	Master Protein	P05201	Aspartate aminotransferase, cytoplasmic OS=Mus musculus OX=10090 GN=Got1 PE=1 SV=3	31	11	46.2	7.05285e+06	2.26236e+07	0.311747
High	Master Protein	Q9DBR7	Protein phosphatase 1 regulatory subunit 12A OS=Mus musculus OX=10090 GN=Ppp1r12a PE=1 SV=2	10	12	114.9	7.0158e+06	6.38101e+06	1.09948
High	Master Protein	Q8K009	Mitochondrial 10-formyltetrahydrofolate dehydrogenase OS=Mus musculus OX=10090 GN=Aldh1l2 PE=1 SV=2	15	15	101.5	6.99448e+06	1.07047e+07	0.653402
High	Master Protein	P21995	Embigin OS=Mus musculus OX=10090 GN=Emb PE=1 SV=2	14	12	37	6.99201e+06	1.60499e+07	0.435642
High	Master Protein	Q8CFE3	REST corepressor 1 OS=Mus musculus OX=10090 GN=Rcor1 PE=1 SV=3	32	19	52.7	6.96203e+06	3.14125e+07	0.221632
High	Master Protein	P26040	Ezrin OS=Mus musculus OX=10090 GN=Ezr PE=1 SV=3	34	35	69.4	6.93378e+06	3.26809e+07	0.212166
High	Master Protein	Q9WUM3	Coronin-1B OS=Mus musculus OX=10090 GN=Coro1b PE=1 SV=1	20	11	53.9	6.89495e+06	1.7146e+07	0.402131
High	Master Protein	Q8CAA7	Glucose 1,6-bisphosphate synthase OS=Mus musculus OX=10090 GN=Pgm2l1 PE=1 SV=1	28	21	70.2	6.88163e+06	1.52597e+07	0.450968
High	Master Protein	P16627	Heat shock 70 kDa protein 1-like OS=Mus musculus OX=10090 GN=Hspa1l PE=1 SV=4	22	37	70.6	6.87921e+06	483140	14.2386
High	Master Protein	P17426	AP-2 complex subunit alpha-1 OS=Mus musculus OX=10090 GN=Ap2a1 PE=1 SV=1	23	23	107.6	6.83549e+06	1.92469e+07	0.355147
High	Master Protein	Q6P549	Phosphatidylinositol 3,4,5-trisphosphate 5-phosphatase 2 OS=Mus musculus OX=10090 GN=Inppl1 PE=1 SV=1	19	26	138.9	6.69915e+06	1.85067e+07	0.361984
High	Master Protein	Q3TWW8	Serine/arginine-rich splicing factor 6 OS=Mus musculus OX=10090 GN=Srsf6 PE=1 SV=1	29	13	39	6.68998e+06	3.76965e+07	0.177469
High	Master Protein	Q9CQX2	Cytochrome b5 type B OS=Mus musculus OX=10090 GN=Cyb5b PE=1 SV=1	55	9	16.3	6.68554e+06	1.20871e+07	0.553115
High	Master Protein	Q9Z1Z0	General vesicular transport factor p115 OS=Mus musculus OX=10090 GN=Uso1 PE=1 SV=2	21	19	106.9	6.67552e+06	1.61764e+07	0.41267
High	Master Protein	E9QN31	Probable 28S rRNA (cytosine-C(5))-methyltransferase OS=Mus musculus OX=10090 GN=Nop2 PE=1 SV=1	28	23	86.9	6.67074e+06	3.89238e+07	0.171379
High	Master Protein	P17156	Heat shock-related 70 kDa protein 2 OS=Mus musculus OX=10090 GN=Hspa2 PE=1 SV=2	47	93	69.6	6.64093e+06	2.16977e+07	0.306066
High	Master Protein	Q91X21	Uncharacterized protein KIAA2013 OS=Mus musculus OX=10090 GN=Kiaa2013 PE=1 SV=1	17	10	69.4	6.63345e+06	1.94842e+07	0.340454
High	Master Protein	A0A0M3HEP7	Phospholipid-transporting ATPase OS=Mus musculus OX=10090 GN=Atp8a1 PE=1 SV=1	16	19	131.4	6.6185e+06	1.38901e+07	0.476491
High	Master Protein	Q8BP47	Asparagine--tRNA ligase, cytoplasmic OS=Mus musculus OX=10090 GN=Nars PE=1 SV=2	32	23	64.2	6.57535e+06	2.7124e+07	0.242418
High	Master Protein	Q6P5E4	UDP-glucose:glycoprotein glucosyltransferase 1 OS=Mus musculus OX=10090 GN=Uggt1 PE=1 SV=4	17	25	176.3	6.57385e+06	2.33633e+07	0.281376
High	Master Protein	Q7TPV4	Myb-binding protein 1A OS=Mus musculus OX=10090 GN=Mybbp1a PE=1 SV=2	18	23	151.9	6.51596e+06	3.16443e+07	0.205912
High	Master Protein	Q99LF4	tRNA-splicing ligase RtcB homolog OS=Mus musculus OX=10090 GN=Rtcb PE=1 SV=1	34	17	55.2	6.47742e+06	2.72651e+07	0.237572
High	Master Protein	Q8JZM7	Parafibromin OS=Mus musculus OX=10090 GN=Cdc73 PE=1 SV=1	24	18	60.5	6.4452e+06	2.51215e+07	0.256561
High	Master Protein	Q9CX86	Heterogeneous nuclear ribonucleoprotein A0 OS=Mus musculus OX=10090 GN=Hnrnpa0 PE=1 SV=1	39	12	30.5	6.43186e+06	2.24705e+07	0.286236
High	Master Protein	Q3TW96	UDP-N-acetylhexosamine pyrophosphorylase-like protein 1 OS=Mus musculus OX=10090 GN=Uap1l1 PE=1 SV=1	25	16	56.6	6.35806e+06	1.90622e+07	0.333543
High	Master Protein	Q2TBE6	Phosphatidylinositol 4-kinase type 2-alpha OS=Mus musculus OX=10090 GN=Pi4k2a PE=1 SV=1	37	20	54.2	6.33743e+06	2.35446e+07	0.269167
High	Master Protein	P08228	Superoxide dismutase [Cu-Zn] OS=Mus musculus OX=10090 GN=Sod1 PE=1 SV=2	54	8	15.9	6.31138e+06	1.0378e+07	0.608148
High	Master Protein	P10922	Histone H1.0 OS=Mus musculus OX=10090 GN=H1f0 PE=2 SV=4	25	8	20.8	6.30707e+06	5.68866e+07	0.110871
High	Master Protein	Q80UG5	Septin-9 OS=Mus musculus OX=10090 GN=Sept9 PE=1 SV=1	30	15	65.5	6.30176e+06	2.26534e+07	0.278182
High	Master Protein	Q64012	RNA-binding protein Raly OS=Mus musculus OX=10090 GN=Raly PE=1 SV=3	26	9	33.2	6.27429e+06	19495461	0.321833
High	Master Protein	Q99PL5	Ribosome-binding protein 1 OS=Mus musculus OX=10090 GN=Rrbp1 PE=1 SV=2	23	23	172.8	6.26278e+06	1.32811e+07	0.471556
High	Master Protein	A2AQW0	Mitogen-activated protein kinase kinase kinase 15 OS=Mus musculus OX=10090 GN=Map3k15 PE=1 SV=1	11	19	149.2	6.23373e+06	1.52981e+07	0.407485
High	Master Protein	Q8CIG8	Protein arginine N-methyltransferase 5 OS=Mus musculus OX=10090 GN=Prmt5 PE=1 SV=3	20	11	72.6	6.19867e+06	2.02814e+07	0.305633
High	Master Protein	Q99K85	Phosphoserine aminotransferase OS=Mus musculus OX=10090 GN=Psat1 PE=1 SV=1	39	16	40.4	6.17136e+06	1.82757e+07	0.337681
High	Master Protein	P50431	Serine hydroxymethyltransferase, cytosolic OS=Mus musculus OX=10090 GN=Shmt1 PE=1 SV=3	30	17	52.6	6.13902e+06	2.12312e+07	0.289151
High	Master Protein	A2AQR0	Glycerol-3-phosphate dehydrogenase OS=Mus musculus OX=10090 GN=Gpd2 PE=1 SV=1	26	16	82.8	6.12671e+06	1.61406e+07	0.379583
High	Master Protein	Q9JIX8	Apoptotic chromatin condensation inducer in the nucleus OS=Mus musculus OX=10090 GN=Acin1 PE=1 SV=3	15	21	150.6	6.12443e+06	3.35579e+07	0.182504
High	Master Protein	A0A0R4IZW5	Cadherin 1, isoform CRA_b OS=Mus musculus OX=10090 GN=Cdh1 PE=1 SV=1	13	10	98.2	6.10567e+06	1.77539e+07	0.343906
High	Master Protein	E0CZ72	Kinesin-like protein OS=Mus musculus OX=10090 GN=Kif2a PE=1 SV=1	21	22	83.8	6.09788e+06	2.04661e+07	0.297951
High	Master Protein	Q9Z0N1	Eukaryotic translation initiation factor 2 subunit 3, X-linked OS=Mus musculus OX=10090 GN=Eif2s3x PE=1 SV=2	34	16	51	6.08548e+06	2.09845e+07	0.29
High	Master Protein	P33609	DNA polymerase alpha catalytic subunit OS=Mus musculus OX=10090 GN=Pola1 PE=1 SV=2	15	20	167.2	6.08472e+06	1.93403e+07	0.314613
High	Master Protein	Q64516	Glycerol kinase OS=Mus musculus OX=10090 GN=Gk PE=1 SV=2	10	7	61.2	6.07995e+06	8.79694e+06	0.691144
High	Master Protein	P80314	T-complex protein 1 subunit beta OS=Mus musculus OX=10090 GN=Cct2 PE=1 SV=4	28	16	57.4	6069494	2.06042e+07	0.294576
High	Master Protein	Q8VBT9	Tether containing UBX domain for GLUT4 OS=Mus musculus OX=10090 GN=Aspscr1 PE=1 SV=1	45	19	59.8	6.06461e+06	1.58768e+07	0.38198
High	Master Protein	Q6PFA2	Clathrin light chain OS=Mus musculus OX=10090 GN=Clta PE=1 SV=1	27	10	23.6	6.06267e+06	4.12871e+07	0.146842
High	Master Protein	Q64518	Sarcoplasmic/endoplasmic reticulum calcium ATPase 3 OS=Mus musculus OX=10090 GN=Atp2a3 PE=1 SV=3	31	40	113.6	6.03931e+06	1.58569e+07	0.380862
High	Master Protein	P41105	60S ribosomal protein L28 OS=Mus musculus OX=10090 GN=Rpl28 PE=1 SV=2	35	11	15.7	6.03257e+06	3.78263e+07	0.159481
High	Master Protein	P47753	F-actin-capping protein subunit alpha-1 OS=Mus musculus OX=10090 GN=Capza1 PE=1 SV=4	49	11	32.9	6.00912e+06	2.24611e+07	0.267534
High	Master Protein	F7DEU6	Inosine-5'-monophosphate dehydrogenase OS=Mus musculus OX=10090 GN=Impdh1 PE=1 SV=2	31	19	57.7	5.9949e+06	2.05729e+07	0.291398
High	Master Protein	Q08943	FACT complex subunit SSRP1 OS=Mus musculus OX=10090 GN=Ssrp1 PE=1 SV=2	22	14	80.8	5.99229e+06	2.73478e+07	0.219114
High	Master Protein	Q91VX2	Ubiquitin-associated protein 2 OS=Mus musculus OX=10090 GN=Ubap2 PE=1 SV=1	13	14	117.9	5.98078e+06	1.88601e+07	0.317112
High	Master Protein	O54941	SWI/SNF-related matrix-associated actin-dependent regulator of chromatin subfamily E member 1 OS=Mus musculus OX=10090 GN=Smarce1 PE=1 SV=1	40	24	46.6	5.97764e+06	2.64358e+07	0.226119
High	Master Protein	Q9CXY6	Interleukin enhancer-binding factor 2 OS=Mus musculus OX=10090 GN=Ilf2 PE=1 SV=1	27	14	43	5.96368e+06	1.48144e+07	0.402561
High	Master Protein	A2AFQ0	E3 ubiquitin-protein ligase HUWE1 OS=Mus musculus OX=10090 GN=Huwe1 PE=1 SV=1	7	26	482.4	5.91937e+06	1.97752e+07	0.299334
High	Master Protein	E9Q4Z2	Acetyl-CoA carboxylase 2 OS=Mus musculus OX=10090 GN=Acacb PE=1 SV=1	18	57	275.6	5.9058e+06	2.65697e+07	0.222276
High	Master Protein	Q9WTM5	RuvB-like 2 OS=Mus musculus OX=10090 GN=Ruvbl2 PE=1 SV=3	29	17	51.1	5.88056e+06	23096300	0.25461
High	Master Protein	P62281	40S ribosomal protein S11 OS=Mus musculus OX=10090 GN=Rps11 PE=1 SV=3	41	8	18.4	5.87547e+06	1.63725e+07	0.358862
High	Master Protein	E9PXY8	Ubiquitin carboxyl-terminal hydrolase 7 OS=Mus musculus OX=10090 GN=Usp7 PE=1 SV=1	18	22	132.8	5.85757e+06	1.89696e+07	0.308788
High	Master Protein	A0A2I3BR81	5'-nucleotidase domain containing 2 OS=Mus musculus OX=10090 GN=Nt5dc2 PE=1 SV=1	19	12	63.8	5.85381e+06	6.86868e+06	0.852246
High	Master Protein	G5E829	Plasma membrane calcium-transporting ATPase 1 OS=Mus musculus OX=10090 GN=Atp2b1 PE=1 SV=1	12	14	134.7	5.82587e+06	1.55836e+07	0.373847
High	Master Protein	Q8CIN4	Serine/threonine-protein kinase PAK 2 OS=Mus musculus OX=10090 GN=Pak2 PE=1 SV=1	47	19	57.9	5.82171e+06	3.10157e+07	0.187702
High	Master Protein	Q9JLB0	MAGUK p55 subfamily member 6 OS=Mus musculus OX=10090 GN=Mpp6 PE=1 SV=1	23	16	62.6	5797169	1.99902e+07	0.290001
High	Master Protein	Q9D666	SUN domain-containing protein 1 OS=Mus musculus OX=10090 GN=Sun1 PE=1 SV=2	10	11	101.9	5.79602e+06	4.9581e+06	1.169
High	Master Protein	A2ALS4	Rap1 GTPase-activating protein 1 OS=Mus musculus OX=10090 GN=Rap1gap PE=1 SV=1	24	19	81.2	5.77141e+06	2.06285e+07	0.279778
High	Master Protein	P67984	60S ribosomal protein L22 OS=Mus musculus OX=10090 GN=Rpl22 PE=1 SV=2	19	4	14.8	5.75533e+06	20994805	0.274131
High	Master Protein	P46467	Vacuolar protein sorting-associated protein 4B OS=Mus musculus OX=10090 GN=Vps4b PE=1 SV=2	30	17	49.4	5.73298e+06	2.78392e+07	0.205932
High	Master Protein	Q9JIK5	Nucleolar RNA helicase 2 OS=Mus musculus OX=10090 GN=Ddx21 PE=1 SV=3	24	20	93.5	5.69762e+06	2.42774e+07	0.234688
High	Master Protein	P54731	FAS-associated factor 1 OS=Mus musculus OX=10090 GN=Faf1 PE=1 SV=2	23	19	73.8	5.68483e+06	2.33613e+07	0.243344
High	Master Protein	Q3TML0	Protein disulfide-isomerase A6 OS=Mus musculus OX=10090 GN=Pdia6 PE=1 SV=1	36	15	48.7	5.67193e+06	3.0562e+07	0.185588
High	Master Protein	A3KG93	Lysine-specific histone demethylase 1A OS=Mus musculus OX=10090 GN=Kdm1a PE=1 SV=1	20	18	94.6	5.63451e+06	1.61882e+07	0.348062
High	Master Protein	Q8CG47	Structural maintenance of chromosomes protein 4 OS=Mus musculus OX=10090 GN=Smc4 PE=1 SV=1	12	19	146.8	5633072	1.98814e+07	0.283334
High	Master Protein	P53026	60S ribosomal protein L10a OS=Mus musculus OX=10090 GN=Rpl10a PE=1 SV=3	35	10	24.9	5.61949e+06	2.35206e+07	0.238917
High	Master Protein	Q5SUS9	RNA-binding protein EWS OS=Mus musculus OX=10090 GN=Ewsr1 PE=1 SV=1	11	12	69	5.61256e+06	2.76061e+07	0.203309
High	Master Protein	P16406	Glutamyl aminopeptidase OS=Mus musculus OX=10090 GN=Enpep PE=1 SV=1	12	14	107.9	5.61245e+06	1.62148e+07	0.346131
High	Master Protein	A2AQC3	Phospholipid-transporting ATPase OS=Mus musculus OX=10090 GN=Atp9a PE=1 SV=1	8	9	124.4	5.60861e+06	4.66461e+06	1.20237
High	Master Protein	A0A1D5RM85	60S ribosomal protein L18a (Fragment) OS=Mus musculus OX=10090 GN=Rpl18a PE=1 SV=1	28	13	24.6	5.58931e+06	2.30553e+07	0.242431
High	Master Protein	Q9Z2I9	Succinate--CoA ligase [ADP-forming] subunit beta, mitochondrial OS=Mus musculus OX=10090 GN=Sucla2 PE=1 SV=2	19	11	50.1	5.58395e+06	16322141	0.342109
High	Master Protein	Q9CQF9	Prenylcysteine oxidase OS=Mus musculus OX=10090 GN=Pcyox1 PE=1 SV=1	30	14	56.5	5.52876e+06	1.61353e+07	0.342651
High	Master Protein	P42227	Signal transducer and activator of transcription 3 OS=Mus musculus OX=10090 GN=Stat3 PE=1 SV=2	24	19	88	5.51255e+06	19376165	0.284502
High	Master Protein	Q9QZQ8	Core histone macro-H2A.1 OS=Mus musculus OX=10090 GN=H2afy PE=1 SV=3	27	14	39.7	5.50712e+06	3.39958e+07	0.161994
High	Master Protein	Q8C129	Leucyl-cystinyl aminopeptidase OS=Mus musculus OX=10090 GN=Lnpep PE=1 SV=1	8	8	117.2	5.48883e+06	7.49889e+06	0.731953
High	Master Protein	Q8BWT1	3-ketoacyl-CoA thiolase, mitochondrial OS=Mus musculus OX=10090 GN=Acaa2 PE=1 SV=3	42	16	41.8	5.46698e+06	3.25794e+07	0.167805
High	Master Protein	P60122	RuvB-like 1 OS=Mus musculus OX=10090 GN=Ruvbl1 PE=1 SV=1	28	14	50.2	5.46081e+06	2.00743e+07	0.272031
High	Master Protein	E9PVA8	eIF-2-alpha kinase activator GCN1 OS=Mus musculus OX=10090 GN=Gcn1 PE=1 SV=1	10	25	292.8	5.45208e+06	1.59274e+07	0.342307
High	Master Protein	Q9CZS1	Aldehyde dehydrogenase X, mitochondrial OS=Mus musculus OX=10090 GN=Aldh1b1 PE=1 SV=1	30	28	57.5	5.44418e+06	1.33164e+07	0.408834
High	Master Protein	Q1HFZ0	tRNA (cytosine(34)-C(5))-methyltransferase OS=Mus musculus OX=10090 GN=Nsun2 PE=1 SV=2	22	22	85.4	5.4364e+06	18438227	0.294844
High	Master Protein	A0A1B0GS68	Predicted gene 45713 OS=Mus musculus OX=10090 GN=Gm45713 PE=2 SV=1	13	12	50.8	5.42574e+06	8.15114e+07	0.0665642
High	Master Protein	Q99L47	Hsc70-interacting protein OS=Mus musculus OX=10090 GN=St13 PE=1 SV=1	19	10	41.6	5.40063e+06	2.29697e+07	0.23512
High	Master Protein	Q8BFR4	N-acetylglucosamine-6-sulfatase OS=Mus musculus OX=10090 GN=Gns PE=1 SV=1	11	10	61.1	5.37587e+06	1.96512e+07	0.273565
High	Master Protein	Q9CXF4	TBC1 domain family member 15 OS=Mus musculus OX=10090 GN=Tbc1d15 PE=1 SV=1	18	9	76.5	5.33382e+06	1.11713e+07	0.477457
High	Master Protein	Q791V5	Mitochondrial carrier homolog 2 OS=Mus musculus OX=10090 GN=Mtch2 PE=1 SV=1	23	8	33.5	5.33285e+06	4.87795e+06	1.09325
High	Master Protein	P97371	Proteasome activator complex subunit 1 OS=Mus musculus OX=10090 GN=Psme1 PE=1 SV=2	53	19	28.7	5.28975e+06	1.92921e+07	0.274193
High	Master Protein	P70195	Proteasome subunit beta type-7 OS=Mus musculus OX=10090 GN=Psmb7 PE=1 SV=1	15	5	29.9	5.28329e+06	14396144	0.366993
High	Master Protein	Q9QXX4	Calcium-binding mitochondrial carrier protein Aralar2 OS=Mus musculus OX=10090 GN=Slc25a13 PE=1 SV=1	41	26	74.4	5.28316e+06	1.63241e+07	0.323642
High	Master Protein	E9PW66	Nucleosome assembly protein 1-like 1 OS=Mus musculus OX=10090 GN=Nap1l1 PE=1 SV=1	28	11	48.5	5.26913e+06	2.60061e+07	0.202611
High	Master Protein	Q61584	Fragile X mental retardation syndrome-related protein 1 OS=Mus musculus OX=10090 GN=Fxr1 PE=1 SV=2	26	19	76.2	5.26747e+06	2.51398e+07	0.209527
High	Master Protein	Q9EPU4	Cleavage and polyadenylation specificity factor subunit 1 OS=Mus musculus OX=10090 GN=Cpsf1 PE=1 SV=1	11	20	160.7	5.23273e+06	1.34762e+07	0.388294
High	Master Protein	Q01279	Epidermal growth factor receptor OS=Mus musculus OX=10090 GN=Egfr PE=1 SV=1	11	16	134.8	5.22692e+06	1.32257e+07	0.395211
High	Master Protein	A0A087WQE8	Kinesin-like protein KIF1A OS=Mus musculus OX=10090 GN=Kif1a PE=1 SV=1	12	28	202	5.2266e+06	1.76648e+07	0.295876
High	Master Protein	P27641	X-ray repair cross-complementing protein 5 OS=Mus musculus OX=10090 GN=Xrcc5 PE=1 SV=4	31	18	83	5.20325e+06	1.75506e+07	0.296471
High	Master Protein	Q7TSV4	Phosphoglucomutase-2 OS=Mus musculus OX=10090 GN=Pgm2 PE=1 SV=1	18	12	68.7	5.18246e+06	1.74516e+07	0.296961
High	Master Protein	Q9Z1Q2	Protein ABHD16A OS=Mus musculus OX=10090 GN=Abhd16a PE=1 SV=3	13	9	63	5.17241e+06	3.25611e+06	1.58853
High	Master Protein	P51660	Peroxisomal multifunctional enzyme type 2 OS=Mus musculus OX=10090 GN=Hsd17b4 PE=1 SV=3	19	15	79.4	5.15457e+06	16566548	0.311143
High	Master Protein	A0A0R4J0Z1	Protein disulfide-isomerase A4 OS=Mus musculus OX=10090 GN=Pdia4 PE=1 SV=1	21	20	72.3	5.13973e+06	2.296e+07	0.223855
High	Master Protein	A0A0R4J0Q9	Conserved oligomeric Golgi complex subunit 7 OS=Mus musculus OX=10090 GN=Cog7 PE=1 SV=1	14	10	86	5.11804e+06	2.4114e+06	2.12243
High	Master Protein	Q9R0E2	Procollagen-lysine,2-oxoglutarate 5-dioxygenase 1 OS=Mus musculus OX=10090 GN=Plod1 PE=1 SV=1	20	14	83.5	5.11682e+06	1.48412e+07	0.344771
High	Master Protein	Q9D883	Splicing factor U2AF 35 kDa subunit OS=Mus musculus OX=10090 GN=U2af1 PE=1 SV=4	20	10	27.8	5.10342e+06	1.46302e+07	0.348828
High	Master Protein	Q68FH0	Plakophilin-4 OS=Mus musculus OX=10090 GN=Pkp4 PE=1 SV=1	20	19	131.5	5.09304e+06	1.64374e+07	0.309845
High	Master Protein	P48758	Carbonyl reductase [NADPH] 1 OS=Mus musculus OX=10090 GN=Cbr1 PE=1 SV=3	38	12	30.6	5.08253e+06	1.66579e+07	0.305113
High	Master Protein	Q3U367	4-trimethylaminobutyraldehyde dehydrogenase OS=Mus musculus OX=10090 GN=Aldh9a1 PE=1 SV=1	20	14	55.9	5.07943e+06	1.55061e+07	0.327577
High	Master Protein	O88712	C-terminal-binding protein 1 OS=Mus musculus OX=10090 GN=Ctbp1 PE=1 SV=2	18	12	47.7	5.07575e+06	1.35545e+07	0.374469
High	Master Protein	Q9Z0X1	Apoptosis-inducing factor 1, mitochondrial OS=Mus musculus OX=10090 GN=Aifm1 PE=1 SV=1	24	15	66.7	5.02435e+06	1.45107e+07	0.346251
High	Master Protein	Q62376	U1 small nuclear ribonucleoprotein 70 kDa OS=Mus musculus OX=10090 GN=Snrnp70 PE=1 SV=2	26	11	52	4.99299e+06	1.99759e+07	0.249951
High	Master Protein	P70398	Probable ubiquitin carboxyl-terminal hydrolase FAF-X OS=Mus musculus OX=10090 GN=Usp9x PE=1 SV=2	7	23	290.5	4.9827e+06	1.36763e+07	0.364332
High	Master Protein	A2A5R2	Brefeldin A-inhibited guanine nucleotide-exchange protein 2 OS=Mus musculus OX=10090 GN=Arfgef2 PE=1 SV=1	9	20	202.1	4.97e+06	1.18812e+07	0.418307
High	Master Protein	Q9ES00	Ubiquitin conjugation factor E4 B OS=Mus musculus OX=10090 GN=Ube4b PE=1 SV=3	16	21	133.2	4.96778e+06	1.24807e+07	0.398036
High	Master Protein	P63166	Small ubiquitin-related modifier 1 OS=Mus musculus OX=10090 GN=Sumo1 PE=1 SV=1	28	4	11.6	4.96504e+06	1.87936e+07	0.264187
High	Master Protein	P30275	Creatine kinase U-type, mitochondrial OS=Mus musculus OX=10090 GN=Ckmt1 PE=1 SV=1	40	13	47	4.96057e+06	1.78756e+07	0.277505
High	Master Protein	Q8C0C7	Phenylalanine--tRNA ligase alpha subunit OS=Mus musculus OX=10090 GN=Farsa PE=1 SV=1	22	16	57.6	4.95683e+06	1.52837e+07	0.324322
High	Master Protein	A0A0R4J140	Clustered mitochondria protein homolog OS=Mus musculus OX=10090 GN=Cluh PE=1 SV=1	7	10	151.7	4.95371e+06	9.20194e+06	0.538333
High	Master Protein	A0A0R4J174	Evolutionarily conserved-signaling intermediate in Toll pathway, mitochondrial OS=Mus musculus OX=10090 GN=Ecsit PE=1 SV=1	35	12	49.7	4.95325e+06	2.3353e+07	0.212103
High	Master Protein	Q61792	LIM and SH3 domain protein 1 OS=Mus musculus OX=10090 GN=Lasp1 PE=1 SV=1	27	14	30	4.95059e+06	3.18892e+07	0.155243
High	Master Protein	Q9JHR7	Insulin-degrading enzyme OS=Mus musculus OX=10090 GN=Ide PE=1 SV=1	12	16	117.7	4.92868e+06	1.91882e+07	0.256859
High	Master Protein	Q9R190	Metastasis-associated protein MTA2 OS=Mus musculus OX=10090 GN=Mta2 PE=1 SV=1	22	14	75	4.90494e+06	1.678e+07	0.292309
High	Master Protein	P54775	26S proteasome regulatory subunit 6B OS=Mus musculus OX=10090 GN=Psmc4 PE=1 SV=2	40	17	47.4	4.90001e+06	2.26011e+07	0.216805
High	Master Protein	A0A0R4J170	Transcription activator BRG1 OS=Mus musculus OX=10090 GN=Smarca4 PE=1 SV=1	18	29	181.7	4.87779e+06	2.43419e+07	0.200386
High	Master Protein	Q8K0C9	GDP-mannose 4,6 dehydratase OS=Mus musculus OX=10090 GN=Gmds PE=1 SV=1	27	10	42	4.87582e+06	1.25431e+07	0.388725
High	Master Protein	O35114	Lysosome membrane protein 2 OS=Mus musculus OX=10090 GN=Scarb2 PE=1 SV=3	18	8	54	4.86655e+06	6.97001e+06	0.698213
High	Master Protein	P46664	Adenylosuccinate synthetase isozyme 2 OS=Mus musculus OX=10090 GN=Adss PE=1 SV=2	39	16	50	4.83213e+06	2.02981e+07	0.238058
High	Master Protein	P17047	Lysosome-associated membrane glycoprotein 2 OS=Mus musculus OX=10090 GN=Lamp2 PE=1 SV=2	9	8	45.7	4.81176e+06	1.53881e+07	0.312693
High	Master Protein	Q920E5	Farnesyl pyrophosphate synthase OS=Mus musculus OX=10090 GN=Fdps PE=1 SV=1	33	16	40.6	4.80945e+06	2.64148e+07	0.182074
High	Master Protein	Q91WG2	Rab GTPase-binding effector protein 2 OS=Mus musculus OX=10090 GN=Rabep2 PE=1 SV=3	23	12	62.1	4.80631e+06	1.32762e+07	0.362025
High	Master Protein	Q8R016	Bleomycin hydrolase OS=Mus musculus OX=10090 GN=Blmh PE=1 SV=1	24	12	52.5	4.79448e+06	1.99523e+07	0.240297
High	Master Protein	A0A0M3HEP6	Calcium-dependent secretion activator 2 OS=Mus musculus OX=10090 GN=Cadps2 PE=1 SV=1	11	12	147.7	4.76921e+06	1.52889e+07	0.311939
High	Master Protein	Q9D786	HAUS augmin-like complex subunit 5 OS=Mus musculus OX=10090 GN=Haus5 PE=1 SV=1	17	12	69.5	4.75742e+06	3.47959e+06	1.36724
High	Master Protein	Q8CGC4	Protein LSM14 homolog B OS=Mus musculus OX=10090 GN=Lsm14b PE=1 SV=3	32	11	42.3	4.75632e+06	1.88802e+07	0.251921
High	Master Protein	O35344	Importin subunit alpha-4 OS=Mus musculus OX=10090 GN=Kpna3 PE=1 SV=1	21	11	57.7	4.7131e+06	1.86016e+07	0.253371
High	Master Protein	Q9D0N7	Chromatin assembly factor 1 subunit B OS=Mus musculus OX=10090 GN=Chaf1b PE=1 SV=1	20	15	63.1	4.69434e+06	1.409e+07	0.333169
High	Master Protein	P60229	Eukaryotic translation initiation factor 3 subunit E OS=Mus musculus OX=10090 GN=Eif3e PE=1 SV=1	25	13	52.2	4.6928e+06	1.82441e+07	0.257224
High	Master Protein	Q9R112	Sulfide:quinone oxidoreductase, mitochondrial OS=Mus musculus OX=10090 GN=Sqor PE=1 SV=3	27	15	50.3	4.69224e+06	1.66294e+07	0.282166
High	Master Protein	A0A0R4J0H7	Condensin complex subunit 1 OS=Mus musculus OX=10090 GN=Ncapd2 PE=1 SV=1	17	19	155.5	4.69125e+06	1.34632e+07	0.348449
High	Master Protein	Q3TUQ5	Pinin OS=Mus musculus OX=10090 GN=Pnn PE=1 SV=1	21	22	82.5	4.6542e+06	3.66044e+07	0.127149
High	Master Protein	Q9QY81	Nuclear pore membrane glycoprotein 210 OS=Mus musculus OX=10090 GN=Nup210 PE=1 SV=2	7	15	204	4.63436e+06	1.11605e+07	0.415246
High	Master Protein	G3X8Y3	N-alpha-acetyltransferase 15, NatA auxiliary subunit OS=Mus musculus OX=10090 GN=Naa15 PE=1 SV=1	15	16	101	4.6262e+06	1.49623e+07	0.309189
High	Master Protein	Q8VCT4	Carboxylesterase 1D OS=Mus musculus OX=10090 GN=Ces1d PE=1 SV=1	26	15	61.7	4.61781e+06	2.41535e+07	0.191186
High	Master Protein	Q9CXT8	Mitochondrial-processing peptidase subunit beta OS=Mus musculus OX=10090 GN=Pmpcb PE=1 SV=1	12	6	54.6	4.60379e+06	992084	4.64053
High	Master Protein	Q04750	DNA topoisomerase 1 OS=Mus musculus OX=10090 GN=Top1 PE=1 SV=2	16	14	90.8	4.5977e+06	2.1333e+07	0.215521
High	Master Protein	P24527	Leukotriene A-4 hydrolase OS=Mus musculus OX=10090 GN=Lta4h PE=1 SV=4	19	16	69	4.57886e+06	1.65715e+07	0.276309
High	Master Protein	P17439	Glucosylceramidase OS=Mus musculus OX=10090 GN=Gba PE=1 SV=1	16	7	57.6	4.5607e+06	1.40329e+07	0.325
High	Master Protein	O35465	Peptidyl-prolyl cis-trans isomerase FKBP8 OS=Mus musculus OX=10090 GN=Fkbp8 PE=1 SV=2	26	12	43.5	4.55732e+06	1.43783e+07	0.316959
High	Master Protein	Q5SUF2	Luc7-like protein 3 OS=Mus musculus OX=10090 GN=Luc7l3 PE=1 SV=1	25	16	51.4	4.55545e+06	1.43964e+07	0.316431
High	Master Protein	B7ZNL2	Nap1l4 protein OS=Mus musculus OX=10090 GN=Nap1l4 PE=1 SV=1	23	9	43.9	4.55002e+06	1.67957e+07	0.270904
High	Master Protein	Q91WK2	Eukaryotic translation initiation factor 3 subunit H OS=Mus musculus OX=10090 GN=Eif3h PE=1 SV=1	37	16	39.8	4.54921e+06	1.80873e+07	0.251514
High	Master Protein	A0A0R4J0Q5	Lamin-B2 OS=Mus musculus OX=10090 GN=Lmnb2 PE=1 SV=1	42	34	69	4.53789e+06	1.60148e+07	0.283357
High	Master Protein	Q9DCW4	Electron transfer flavoprotein subunit beta OS=Mus musculus OX=10090 GN=Etfb PE=1 SV=3	33	12	27.6	4.50576e+06	1.63037e+07	0.276364
High	Master Protein	Q9QUJ7	Long-chain-fatty-acid--CoA ligase 4 OS=Mus musculus OX=10090 GN=Acsl4 PE=1 SV=2	23	14	79	4.49828e+06	1.25713e+07	0.357821
High	Master Protein	Q8CGY8	UDP-N-acetylglucosamine--peptide N-acetylglucosaminyltransferase 110 kDa subunit OS=Mus musculus OX=10090 GN=Ogt PE=1 SV=2	12	14	116.9	4.49499e+06	1.27115e+07	0.353617
High	Master Protein	P97452	Ribosome biogenesis protein BOP1 OS=Mus musculus OX=10090 GN=Bop1 PE=1 SV=1	18	12	82.5	4.44237e+06	2.9461e+07	0.150788
High	Master Protein	Q9CQM9	Glutaredoxin-3 OS=Mus musculus OX=10090 GN=Glrx3 PE=1 SV=1	23	11	37.8	4.44075e+06	1.85982e+07	0.238773
High	Master Protein	G3UXW9	COP9 signalosome complex subunit 1 OS=Mus musculus OX=10090 GN=Gps1 PE=1 SV=1	24	15	58.8	4.41121e+06	1.26606e+07	0.348422
High	Master Protein	P27659	60S ribosomal protein L3 OS=Mus musculus OX=10090 GN=Rpl3 PE=1 SV=3	33	14	46.1	4.39323e+06	3.0774e+07	0.142758
High	Master Protein	Q91YR7	Pre-mRNA-processing factor 6 OS=Mus musculus OX=10090 GN=Prpf6 PE=1 SV=1	13	16	106.7	4.3797e+06	1.73296e+07	0.25273
High	Master Protein	O35218	Cleavage and polyadenylation specificity factor subunit 2 OS=Mus musculus OX=10090 GN=Cpsf2 PE=1 SV=1	11	9	88.3	4.37433e+06	1.21931e+07	0.358755
High	Master Protein	Q9ERU9	E3 SUMO-protein ligase RanBP2 OS=Mus musculus OX=10090 GN=Ranbp2 PE=1 SV=2	12	30	340.9	4.37259e+06	1.51585e+07	0.288458
High	Master Protein	Q60676	Serine/threonine-protein phosphatase 5 OS=Mus musculus OX=10090 GN=Ppp5c PE=1 SV=3	29	16	56.8	4.35873e+06	1.44259e+07	0.302146
High	Master Protein	O08601	Microsomal triglyceride transfer protein large subunit OS=Mus musculus OX=10090 GN=Mttp PE=1 SV=2	16	15	99	4.34892e+06	1.55621e+07	0.279455
High	Master Protein	Q921G7	Electron transfer flavoprotein-ubiquinone oxidoreductase, mitochondrial OS=Mus musculus OX=10090 GN=Etfdh PE=1 SV=1	25	15	68	4.34255e+06	1.69753e+07	0.255815
High	Master Protein	A0A0R4J1E2	Elongation factor 1-delta OS=Mus musculus OX=10090 GN=Eef1d PE=1 SV=1	9	6	72.9	4.28928e+06	6.43687e+06	0.666362
High	Master Protein	P08775	DNA-directed RNA polymerase II subunit RPB1 OS=Mus musculus OX=10090 GN=Polr2a PE=1 SV=3	4	6	217	4.28361e+06	1.12388e+07	0.381144
High	Master Protein	A2AMW0	Capping protein (Actin filament) muscle Z-line, beta, isoform CRA_a OS=Mus musculus OX=10090 GN=Capzb PE=1 SV=1	20	5	29.3	4.25104e+06	8.02244e+06	0.529894
High	Master Protein	Q64442	Sorbitol dehydrogenase OS=Mus musculus OX=10090 GN=Sord PE=1 SV=3	21	10	38.2	4.24233e+06	1.31219e+07	0.3233
High	Master Protein	Q60692	Proteasome subunit beta type-6 OS=Mus musculus OX=10090 GN=Psmb6 PE=1 SV=3	17	7	25.4	4.24106e+06	6.86722e+06	0.617581
High	Master Protein	E9Q3Y4	Lipopolysaccharide-responsive and beige-like anchor protein OS=Mus musculus OX=10090 GN=Lrba PE=1 SV=1	6	17	316.6	4.22574e+06	1.1815e+07	0.357658
High	Master Protein	D3Z7P3	Glutaminase kidney isoform, mitochondrial OS=Mus musculus OX=10090 GN=Gls PE=1 SV=1	19	12	73.9	4.22446e+06	7.3777e+06	0.572598
High	Master Protein	Q9JHU9	Inositol-3-phosphate synthase 1 OS=Mus musculus OX=10090 GN=Isyna1 PE=1 SV=1	17	8	60.9	4.19848e+06	9.39228e+06	0.447014
High	Master Protein	Q64511	DNA topoisomerase 2-beta OS=Mus musculus OX=10090 GN=Top2b PE=1 SV=2	19	33	181.8	4.1857e+06	2.02644e+07	0.206554
High	Master Protein	Q91YW3	DnaJ homolog subfamily C member 3 OS=Mus musculus OX=10090 GN=Dnajc3 PE=1 SV=1	5	3	57.4	4.16396e+06	1.50143e+06	2.77333
High	Master Protein	F8WGU3	Epithelial-splicing regulatory protein 1 OS=Mus musculus OX=10090 GN=Esrp1 PE=1 SV=1	13	12	75.6	4.15532e+06	6.66371e+06	0.623574
High	Master Protein	G5E843	Roundabout homolog 1 OS=Mus musculus OX=10090 GN=Robo1 PE=1 SV=1	14	19	176.3	4.14533e+06	1.48482e+07	0.27918
High	Master Protein	P15532	Nucleoside diphosphate kinase A OS=Mus musculus OX=10090 GN=Nme1 PE=1 SV=1	38	8	17.2	4.12969e+06	1.9129e+07	0.215886
High	Master Protein	O88532	Zinc finger RNA-binding protein OS=Mus musculus OX=10090 GN=Zfr PE=1 SV=2	18	17	116.8	4.12653e+06	1.49412e+07	0.276185
High	Master Protein	Q9D4H8	Cullin-2 OS=Mus musculus OX=10090 GN=Cul2 PE=1 SV=2	18	17	86.8	4.12014e+06	1.37714e+07	0.299182
High	Master Protein	E9Q557	Desmoplakin OS=Mus musculus OX=10090 GN=Dsp PE=1 SV=1	5	16	332.7	4.11929e+06	6.62105e+06	0.62215
High	Master Protein	P62858	40S ribosomal protein S28 OS=Mus musculus OX=10090 GN=Rps28 PE=1 SV=1	30	4	7.8	4.11476e+06	1.18856e+07	0.346198
High	Master Protein	Q811J3	Iron-responsive element-binding protein 2 OS=Mus musculus OX=10090 GN=Ireb2 PE=1 SV=2	7	9	104.9	4.10663e+06	1.89901e+06	2.16251
High	Master Protein	P35235	Tyrosine-protein phosphatase non-receptor type 11 OS=Mus musculus OX=10090 GN=Ptpn11 PE=1 SV=2	26	20	68.4	4.10662e+06	1.6095e+07	0.255148
High	Master Protein	Q9D8W5	26S proteasome non-ATPase regulatory subunit 12 OS=Mus musculus OX=10090 GN=Psmd12 PE=1 SV=4	30	16	52.9	4.0981e+06	2.03848e+07	0.201037
High	Master Protein	A0A0J9YUL3	Septin 11, isoform CRA_b OS=Mus musculus OX=10090 GN=Sept11 PE=1 SV=1	26	17	49.8	4.09558e+06	1.92182e+07	0.21311
High	Master Protein	P49717	DNA replication licensing factor MCM4 OS=Mus musculus OX=10090 GN=Mcm4 PE=1 SV=1	25	20	96.7	4.08226e+06	2.12131e+07	0.192441
High	Master Protein	P09055	Integrin beta-1 OS=Mus musculus OX=10090 GN=Itgb1 PE=1 SV=1	12	11	88.2	4.07774e+06	1.19758e+07	0.340497
High	Master Protein	Q8CAQ8	MICOS complex subunit Mic60 OS=Mus musculus OX=10090 GN=Immt PE=1 SV=1	29	23	83.8	4.07409e+06	2.07076e+07	0.196743
High	Master Protein	Q9CSH3	Exosome complex exonuclease RRP44 OS=Mus musculus OX=10090 GN=Dis3 PE=1 SV=4	16	14	108.8	4.07196e+06	1.49742e+07	0.271932
High	Master Protein	Q8R1F6	Protein HID1 OS=Mus musculus OX=10090 GN=Hid1 PE=1 SV=1	14	12	88.7	4.07168e+06	6.31788e+06	0.644469
High	Master Protein	Q6PFB2	Rcc1 protein OS=Mus musculus OX=10090 GN=Rcc1 PE=1 SV=1	20	10	46.3	4.07167e+06	1.23131e+07	0.330678
High	Master Protein	K3W4R2	Myosin-14 OS=Mus musculus OX=10090 GN=Myh14 PE=1 SV=1	13	29	228.4	4.05163e+06	9.28491e+06	0.436367
High	Master Protein	P52293	Importin subunit alpha-1 OS=Mus musculus OX=10090 GN=Kpna2 PE=1 SV=2	26	13	57.9	4.04821e+06	1.53332e+07	0.264016
High	Master Protein	Q9Z1D1	Eukaryotic translation initiation factor 3 subunit G OS=Mus musculus OX=10090 GN=Eif3g PE=1 SV=2	30	12	35.6	4.04516e+06	2.06371e+07	0.196014
High	Master Protein	Q9WUM4	Coronin-1C OS=Mus musculus OX=10090 GN=Coro1c PE=1 SV=2	24	13	53.1	4.03451e+06	1.86052e+07	0.216849
High	Master Protein	Q99JX3	Golgi reassembly-stacking protein 2 OS=Mus musculus OX=10090 GN=Gorasp2 PE=1 SV=3	21	11	47	4.03277e+06	13908366	0.289953
High	Master Protein	P47791	Glutathione reductase, mitochondrial OS=Mus musculus OX=10090 GN=Gsr PE=1 SV=3	19	11	53.6	4.0014e+06	1.35259e+07	0.295832
High	Master Protein	Q99JY0	Trifunctional enzyme subunit beta, mitochondrial OS=Mus musculus OX=10090 GN=Hadhb PE=1 SV=1	19	12	51.4	3.99199e+06	1.88096e+07	0.212232
High	Master Protein	G3UXA6	Polypyrimidine tract-binding protein 3 OS=Mus musculus OX=10090 GN=Ptbp3 PE=1 SV=1	34	27	59.7	3.98843e+06	2.72828e+07	0.146189
High	Master Protein	Q8VDM6	Heterogeneous nuclear ribonucleoprotein U-like protein 1 OS=Mus musculus OX=10090 GN=Hnrnpul1 PE=1 SV=1	18	13	95.9	3.98494e+06	1.25538e+07	0.317429
High	Master Protein	Q9EST5	Acidic leucine-rich nuclear phosphoprotein 32 family member B OS=Mus musculus OX=10090 GN=Anp32b PE=1 SV=1	21	11	31.1	3.97989e+06	1.68627e+07	0.236017
High	Master Protein	Q9DBG7	Signal recognition particle receptor subunit alpha OS=Mus musculus OX=10090 GN=Srpra PE=1 SV=1	21	11	69.6	3.93236e+06	8.44868e+06	0.465441
High	Master Protein	Q6PDS3	Sterile alpha and TIR motif-containing protein 1 OS=Mus musculus OX=10090 GN=Sarm1 PE=1 SV=1	16	16	79.6	3.92444e+06	6.24338e+06	0.628576
High	Master Protein	O08715	A-kinase anchor protein 1, mitochondrial OS=Mus musculus OX=10090 GN=Akap1 PE=1 SV=4	15	8	92.1	3.89904e+06	2.12088e+06	1.83841
High	Master Protein	Q60715	Prolyl 4-hydroxylase subunit alpha-1 OS=Mus musculus OX=10090 GN=P4ha1 PE=1 SV=2	23	11	60.9	3.89566e+06	1.13412e+07	0.343495
High	Master Protein	Q9R0P5	Destrin OS=Mus musculus OX=10090 GN=Dstn PE=1 SV=3	38	7	18.5	3.89336e+06	8.78589e+06	0.443137
High	Master Protein	Q6PGG6	Guanine nucleotide-binding protein-like 3-like protein OS=Mus musculus OX=10090 GN=Gnl3l PE=1 SV=1	27	13	65.2	3.89173e+06	1.24775e+07	0.311899
High	Master Protein	Q80U63	Mitofusin-2 OS=Mus musculus OX=10090 GN=Mfn2 PE=1 SV=3	19	20	86.1	3.89171e+06	1.43095e+07	0.271967
High	Master Protein	P10630	Eukaryotic initiation factor 4A-II OS=Mus musculus OX=10090 GN=Eif4a2 PE=1 SV=2	48	40	46.4	3.87303e+06	1.96569e+07	0.197032
High	Master Protein	A2AFF6	Cohesin subunit SA-2 OS=Mus musculus OX=10090 GN=Stag2 PE=1 SV=1	7	12	145.6	3.84146e+06	1.15367e+07	0.332978
High	Master Protein	P54822	Adenylosuccinate lyase OS=Mus musculus OX=10090 GN=Adsl PE=1 SV=2	17	9	54.8	3.8331e+06	9.63649e+06	0.39777
High	Master Protein	F8WHY8	Metastasis-associated protein MTA1 OS=Mus musculus OX=10090 GN=Mta1 PE=1 SV=1	19	15	79.1	3.82824e+06	1.26343e+07	0.303003
High	Master Protein	G5E896	Enhancer of mRNA decapping 4, isoform CRA_b OS=Mus musculus OX=10090 GN=Edc4 PE=1 SV=1	15	20	152.4	3.82137e+06	1.26613e+07	0.301816
High	Master Protein	Q9CPV4	Glyoxalase domain-containing protein 4 OS=Mus musculus OX=10090 GN=Glod4 PE=1 SV=1	30	11	33.3	3.82122e+06	1.11938e+07	0.34137
High	Master Protein	O88544	COP9 signalosome complex subunit 4 OS=Mus musculus OX=10090 GN=Cops4 PE=1 SV=1	29	12	46.3	3.8209e+06	1.21957e+07	0.313299
High	Master Protein	P56546	C-terminal-binding protein 2 OS=Mus musculus OX=10090 GN=Ctbp2 PE=1 SV=2	18	8	48.9	3.81403e+06	1.21746e+07	0.313279
High	Master Protein	Q8C547	HEAT repeat-containing protein 5B OS=Mus musculus OX=10090 GN=Heatr5b PE=1 SV=3	1	2	224.2	3.81111e+06	14451575	0.263716
High	Master Protein	Q9D1R9	60S ribosomal protein L34 OS=Mus musculus OX=10090 GN=Rpl34 PE=1 SV=2	30	7	13.3	3.8076e+06	1.50693e+07	0.252672
High	Master Protein	Q99JP7	Glutathione hydrolase 7 OS=Mus musculus OX=10090 GN=Ggt7 PE=1 SV=2	21	13	70.2	3.79266e+06	1.00498e+07	0.377385
High	Master Protein	Q9Z2U1	Proteasome subunit alpha type-5 OS=Mus musculus OX=10090 GN=Psma5 PE=1 SV=1	15	4	26.4	3.77653e+06	6.79159e+06	0.55606
High	Master Protein	F2Z456	NADH-cytochrome b5 reductase OS=Mus musculus OX=10090 GN=Cyb5r3 PE=1 SV=1	32	9	34.9	3.76848e+06	1.67878e+07	0.224477
High	Master Protein	A0A1B0GSG5	Ribonuclease inhibitor OS=Mus musculus OX=10090 GN=Rnh1 PE=1 SV=1	20	8	53.9	3.76645e+06	6.81454e+06	0.552707
High	Master Protein	Q9Z277	Tyrosine-protein kinase BAZ1B OS=Mus musculus OX=10090 GN=Baz1b PE=1 SV=2	12	18	170.5	3.75468e+06	2.25021e+07	0.166859
High	Master Protein	G5E8N7	Bifunctional polynucleotide phosphatase/kinase OS=Mus musculus OX=10090 GN=Pnkp PE=1 SV=1	26	13	57.2	3.75115e+06	1.54554e+07	0.242708
High	Master Protein	P62702	40S ribosomal protein S4, X isoform OS=Mus musculus OX=10090 GN=Rps4x PE=1 SV=2	24	7	29.6	3.73254e+06	7.21611e+06	0.517252
High	Master Protein	Q8K0D5	Elongation factor G, mitochondrial OS=Mus musculus OX=10090 GN=Gfm1 PE=1 SV=1	16	10	83.5	3.72605e+06	1.00149e+07	0.372053
High	Master Protein	Q922J9	Fatty acyl-CoA reductase 1 OS=Mus musculus OX=10090 GN=Far1 PE=1 SV=1	18	11	59.4	3.69537e+06	9.0283e+06	0.409309
High	Master Protein	P47962	60S ribosomal protein L5 OS=Mus musculus OX=10090 GN=Rpl5 PE=1 SV=3	38	16	34.4	3.6843e+06	2.79714e+07	0.131717
High	Master Protein	Q99KH8	Serine/threonine-protein kinase 24 OS=Mus musculus OX=10090 GN=Stk24 PE=1 SV=1	23	12	47.9	3.67574e+06	1.39007e+07	0.264428
High	Master Protein	Q9JK81	UPF0160 protein MYG1, mitochondrial OS=Mus musculus OX=10090 GN=Myg1 PE=1 SV=1	26	13	42.7	3.67542e+06	8.94302e+06	0.410983
Medium	Master Protein	Q9EST4	Proteasome assembly chaperone 2 OS=Mus musculus OX=10090 GN=Psmg2 PE=1 SV=1	3	3	29.5	3.67007e+06	4707268	0.779661
High	Master Protein	E9Q8Z5	Catenin delta-1 OS=Mus musculus OX=10090 GN=Ctnnd1 PE=1 SV=1	16	15	104.9	3.64739e+06	1.37328e+07	0.265598
High	Master Protein	A2AKB9	DDB1- and CUL4-associated factor 10 OS=Mus musculus OX=10090 GN=Dcaf10 PE=1 SV=1	1	2	61.5	3644902	8.00199e+06	0.4555
High	Master Protein	Q9QUM9	Proteasome subunit alpha type-6 OS=Mus musculus OX=10090 GN=Psma6 PE=1 SV=1	29	9	27.4	3.63552e+06	7.69174e+06	0.472653
High	Master Protein	P05132	cAMP-dependent protein kinase catalytic subunit alpha OS=Mus musculus OX=10090 GN=Prkaca PE=1 SV=3	20	8	40.5	3.63171e+06	1.61755e+07	0.224519
High	Master Protein	A2AS98	Nck-associated protein 1 OS=Mus musculus OX=10090 GN=Nckap1 PE=1 SV=1	11	15	129.4	3.62317e+06	1.12567e+07	0.321868
High	Master Protein	Q8BG51	Mitochondrial Rho GTPase 1 OS=Mus musculus OX=10090 GN=Rhot1 PE=1 SV=1	4	6	72.2	3.6053e+06	6.3454e+06	0.568176
High	Master Protein	P50544	Very long-chain specific acyl-CoA dehydrogenase, mitochondrial OS=Mus musculus OX=10090 GN=Acadvl PE=1 SV=3	23	15	70.8	3.60486e+06	1.46039e+07	0.246842
High	Master Protein	A2A9Q2	Nardilysin, N-arginine dibasic convertase, NRD convertase 1 OS=Mus musculus OX=10090 GN=Nrd1 PE=1 SV=1	13	17	140.5	3.60174e+06	1.37262e+07	0.262398
High	Master Protein	Q08509	Epidermal growth factor receptor kinase substrate 8 OS=Mus musculus OX=10090 GN=Eps8 PE=1 SV=2	21	15	91.7	3.58839e+06	1.39783e+07	0.256712
High	Master Protein	Q61102	ATP-binding cassette sub-family B member 7, mitochondrial OS=Mus musculus OX=10090 GN=Abcb7 PE=1 SV=3	17	13	82.5	3.57682e+06	9.66927e+06	0.369916
High	Master Protein	Q9JME5	AP-3 complex subunit beta-2 OS=Mus musculus OX=10090 GN=Ap3b2 PE=1 SV=2	16	16	119.1	3.57653e+06	1.30626e+07	0.273799
High	Master Protein	Q9R069	Basal cell adhesion molecule OS=Mus musculus OX=10090 GN=Bcam PE=1 SV=1	6	3	67.6	3.57261e+06	478504	7.46621
High	Master Protein	Q3U7R1	Extended synaptotagmin-1 OS=Mus musculus OX=10090 GN=Esyt1 PE=1 SV=2	16	17	121.5	3.55821e+06	1.07558e+07	0.330818
High	Master Protein	Q9D2V7	Coronin-7 OS=Mus musculus OX=10090 GN=Coro7 PE=1 SV=2	22	14	100.7	3.54373e+06	1.17919e+07	0.300522
High	Master Protein	Q924B0	Inositol-1-monophosphatase OS=Mus musculus OX=10090 GN=Impa1 PE=1 SV=1	29	8	30.4	3.53964e+06	1.14946e+07	0.30794
High	Master Protein	B2RXS4	Plexin-B2 OS=Mus musculus OX=10090 GN=Plxnb2 PE=1 SV=1	7	15	206.1	3.53275e+06	1.06612e+07	0.331366
High	Master Protein	Q3UNH4	G protein-regulated inducer of neurite outgrowth 1 OS=Mus musculus OX=10090 GN=Gprin1 PE=1 SV=2	23	22	95.4	3.51712e+06	1.53814e+07	0.228661
High	Master Protein	G3UWX1	Replication factor C subunit 1 OS=Mus musculus OX=10090 GN=Rfc1 PE=1 SV=2	18	20	127.5	3.51173e+06	1.28664e+07	0.272939
High	Master Protein	P54823	Probable ATP-dependent RNA helicase DDX6 OS=Mus musculus OX=10090 GN=Ddx6 PE=1 SV=1	21	9	54.2	3.48712e+06	1.2442e+07	0.28027
High	Master Protein	Q8VHE0	Translocation protein SEC63 homolog OS=Mus musculus OX=10090 GN=Sec63 PE=1 SV=4	14	12	87.8	3.4831e+06	7.31368e+06	0.476244
High	Master Protein	Q3UHX9	Putative methyltransferase C9orf114 homolog OS=Mus musculus OX=10090 GN=Spout1 PE=1 SV=1	30	12	42.9	3.47461e+06	1.50017e+07	0.231614
High	Master Protein	Q3U9G9	Lamin-B receptor OS=Mus musculus OX=10090 GN=Lbr PE=1 SV=2	11	10	71.4	3.46598e+06	8.72389e+06	0.397297
High	Master Protein	Q8VCF0	Mitochondrial antiviral-signaling protein OS=Mus musculus OX=10090 GN=Mavs PE=1 SV=1	33	12	53.4	3.45129e+06	3.07733e+06	1.12152
High	Master Protein	Q99KQ4	Nicotinamide phosphoribosyltransferase OS=Mus musculus OX=10090 GN=Nampt PE=1 SV=1	27	12	55.4	3.43365e+06	1.51819e+07	0.226168
High	Master Protein	Q8K2L8	Trafficking protein particle complex subunit 12 OS=Mus musculus OX=10090 GN=Trappc12 PE=1 SV=2	17	14	87.6	3.43281e+06	1.35303e+07	0.253714
High	Master Protein	Q99JI6	Ras-related protein Rap-1b OS=Mus musculus OX=10090 GN=Rap1b PE=1 SV=2	39	10	20.8	3.41635e+06	9461995	0.36106
High	Master Protein	P35922	Synaptic functional regulator FMR1 OS=Mus musculus OX=10090 GN=Fmr1 PE=1 SV=1	23	19	68.9	3.40811e+06	1.53336e+07	0.222264
High	Master Protein	P83741	Serine/threonine-protein kinase WNK1 OS=Mus musculus OX=10090 GN=Wnk1 PE=1 SV=2	5	13	250.8	3.39724e+06	9.88337e+06	0.343734
High	Master Protein	O08800	Serpin B8 OS=Mus musculus OX=10090 GN=Serpinb8 PE=1 SV=2	15	6	42.1	3.38397e+06	5.10829e+06	0.662448
High	Master Protein	Q6PDI5	Proteasome adapter and scaffold protein ECM29 OS=Mus musculus OX=10090 GN=Ecpas PE=1 SV=3	15	24	203.6	3.38094e+06	1.30993e+07	0.258101
High	Master Protein	Q8BML9	Glutamine--tRNA ligase OS=Mus musculus OX=10090 GN=Qars PE=1 SV=1	10	7	87.6	3.37912e+06	7.40456e+06	0.456357
High	Master Protein	Q8C079	Striatin-interacting protein 1 OS=Mus musculus OX=10090 GN=Strip1 PE=1 SV=2	11	10	95.5	3.37467e+06	8.64903e+06	0.390179
High	Master Protein	Q6P1F6	Serine/threonine-protein phosphatase 2A 55 kDa regulatory subunit B alpha isoform OS=Mus musculus OX=10090 GN=Ppp2r2a PE=1 SV=1	24	8	51.7	3.372e+06	1.26991e+07	0.26553
High	Master Protein	O54984	ATPase Asna1 OS=Mus musculus OX=10090 GN=Asna1 PE=1 SV=2	28	10	38.8	3.36817e+06	1.15034e+07	0.292797
High	Master Protein	Q8BGS7	Choline/ethanolaminephosphotransferase 1 OS=Mus musculus OX=10090 GN=Cept1 PE=1 SV=1	5	2	46.4	3.36154e+06	608779	5.52178
High	Master Protein	Q8C522	Endonuclease domain-containing 1 protein OS=Mus musculus OX=10090 GN=Endod1 PE=1 SV=2	13	8	55.2	3.36045e+06	2.54791e+06	1.3189
High	Master Protein	Q8CIH9	Amidophosphoribosyltransferase OS=Mus musculus OX=10090 GN=Ppat PE=1 SV=1	11	7	57.4	3.35975e+06	6.85244e+06	0.4903
High	Master Protein	P97372	Proteasome activator complex subunit 2 OS=Mus musculus OX=10090 GN=Psme2 PE=1 SV=4	40	8	27	3.34764e+06	7.24205e+06	0.462251
High	Master Protein	P62889	60S ribosomal protein L30 OS=Mus musculus OX=10090 GN=Rpl30 PE=1 SV=2	36	5	12.8	3.34379e+06	6.9354e+06	0.482134
High	Master Protein	Q6A068	Cell division cycle 5-like protein OS=Mus musculus OX=10090 GN=Cdc5l PE=1 SV=2	25	18	92.1	3.33272e+06	1.53478e+07	0.217146
High	Master Protein	E9PUA5	Kinesin-like protein OS=Mus musculus OX=10090 GN=Kifc5b PE=1 SV=1	17	12	73.6	3.32198e+06	8.40348e+06	0.395311
High	Master Protein	Q9ER00	Syntaxin-12 OS=Mus musculus OX=10090 GN=Stx12 PE=1 SV=1	27	7	31.2	3.31271e+06	1.43405e+07	0.231003
High	Master Protein	Q8BVE3	V-type proton ATPase subunit H OS=Mus musculus OX=10090 GN=Atp6v1h PE=1 SV=1	19	10	55.8	3.30924e+06	1.53791e+07	0.215178
High	Master Protein	G5E8R8	UBX domain-containing protein 7 OS=Mus musculus OX=10090 GN=Ubxn7 PE=1 SV=1	28	16	54.8	3.30448e+06	1.16053e+07	0.284739
High	Master Protein	Q9JLI8	Squamous cell carcinoma antigen recognized by T-cells 3 OS=Mus musculus OX=10090 GN=Sart3 PE=1 SV=1	11	8	109.6	3.30287e+06	9832483	0.335914
High	Master Protein	P62267	40S ribosomal protein S23 OS=Mus musculus OX=10090 GN=Rps23 PE=1 SV=3	48	6	15.8	3.30226e+06	2.39536e+07	0.13786
High	Master Protein	Q9EQ20	Methylmalonate-semialdehyde dehydrogenase [acylating], mitochondrial OS=Mus musculus OX=10090 GN=Aldh6a1 PE=1 SV=1	9	4	57.9	3.29699e+06	340378	9.68628
High	Master Protein	Q91W50	Cold shock domain-containing protein E1 OS=Mus musculus OX=10090 GN=Csde1 PE=1 SV=1	13	10	88.7	3.29588e+06	10703673	0.30792
High	Master Protein	Q8BL97	Serine/arginine-rich splicing factor 7 OS=Mus musculus OX=10090 GN=Srsf7 PE=1 SV=1	17	6	30.8	3.28346e+06	1.98264e+07	0.165611
High	Master Protein	Q6ZQ08	CCR4-NOT transcription complex subunit 1 OS=Mus musculus OX=10090 GN=Cnot1 PE=1 SV=2	6	15	266.6	3.2675e+06	7.47935e+06	0.43687
High	Master Protein	Q9DBJ1	Phosphoglycerate mutase 1 OS=Mus musculus OX=10090 GN=Pgam1 PE=1 SV=3	57	13	28.8	3.26159e+06	2.01928e+07	0.161523
High	Master Protein	Q8BTZ4	Anaphase-promoting complex subunit 5 OS=Mus musculus OX=10090 GN=Anapc5 PE=1 SV=1	3	3	83	3.25353e+06	2.40203e+06	1.3545
High	Master Protein	Q8CHP8	Glycerol-3-phosphate phosphatase OS=Mus musculus OX=10090 GN=Pgp PE=1 SV=1	21	8	34.5	3.25101e+06	7232695	0.449488
High	Master Protein	Q05816	Fatty acid-binding protein, epidermal OS=Mus musculus OX=10090 GN=Fabp5 PE=1 SV=3	46	8	15.1	3.25057e+06	9.27706e+06	0.350388
High	Master Protein	Q8VBZ3	Cleft lip and palate transmembrane protein 1 homolog OS=Mus musculus OX=10090 GN=Clptm1 PE=1 SV=1	16	16	75.2	3.24542e+06	7.42628e+06	0.437019
High	Master Protein	A0A0R4J008	Histone deacetylase OS=Mus musculus OX=10090 GN=Hdac2 PE=1 SV=1	24	16	55.3	3.23984e+06	1.22883e+07	0.263653
High	Master Protein	D3YYT1	Putative oxidoreductase GLYR1 OS=Mus musculus OX=10090 GN=Glyr1 PE=1 SV=1	31	16	60.4	3.23393e+06	1.40762e+07	0.229744
High	Master Protein	Q9CR16	Peptidyl-prolyl cis-trans isomerase D OS=Mus musculus OX=10090 GN=Ppid PE=1 SV=3	22	8	40.7	3.21764e+06	1.16759e+07	0.275579
High	Master Protein	E9QAQ5	Glycogen synthase kinase-3 beta OS=Mus musculus OX=10090 GN=Gsk3b PE=1 SV=1	23	8	48	3.21372e+06	1.26655e+07	0.253739
High	Master Protein	Q3THS6	S-adenosylmethionine synthase isoform type-2 OS=Mus musculus OX=10090 GN=Mat2a PE=1 SV=2	16	7	43.7	3.20286e+06	9.28034e+06	0.345124
High	Master Protein	D3YZZ5	Transmembrane p24-trafficking protein 7 OS=Mus musculus OX=10090 GN=Tmed7 PE=1 SV=1	25	7	25.2	3.16732e+06	7.46933e+06	0.424043
High	Master Protein	A0A1B0GS91	Supervillin OS=Mus musculus OX=10090 GN=Svil PE=1 SV=1	13	27	253.1	3.16698e+06	1.15218e+07	0.27487
High	Master Protein	Q8K2P7	Sodium-coupled neutral amino acid transporter 1 OS=Mus musculus OX=10090 GN=Slc38a1 PE=1 SV=1	6	5	53.8	3.15654e+06	1.02386e+07	0.308298
High	Master Protein	Q9CW46	Ribonucleoprotein PTB-binding 1 OS=Mus musculus OX=10090 GN=Raver1 PE=1 SV=2	36	16	79.3	3.14757e+06	1.67309e+07	0.188129
High	Master Protein	Q9CXJ4	ATP-binding cassette sub-family B member 8, mitochondrial OS=Mus musculus OX=10090 GN=Abcb8 PE=1 SV=1	16	9	78	3.13955e+06	8.49768e+06	0.36946
High	Master Protein	B1AZI6	THO complex subunit 2 OS=Mus musculus OX=10090 GN=Thoc2 PE=1 SV=1	7	14	182.7	3.1353e+06	9.4586e+06	0.331476
High	Master Protein	Q91VW3	SH3 domain-binding glutamic acid-rich-like protein 3 OS=Mus musculus OX=10090 GN=Sh3bgrl3 PE=1 SV=1	40	5	10.5	3.133e+06	8.91416e+06	0.351464
High	Master Protein	Q62418	Drebrin-like protein OS=Mus musculus OX=10090 GN=Dbnl PE=1 SV=2	33	16	48.7	3.13215e+06	1.73173e+07	0.180868
High	Master Protein	Q9D2R0	Acetoacetyl-CoA synthetase OS=Mus musculus OX=10090 GN=Aacs PE=1 SV=1	14	12	75.2	3.13146e+06	1.33259e+07	0.234991
High	Master Protein	Q8BRN9	Coiled-coil and C2 domain-containing protein 1B OS=Mus musculus OX=10090 GN=Cc2d1b PE=1 SV=1	16	11	93	3.11261e+06	1.30094e+07	0.239258
High	Master Protein	Q9D0M3	Cytochrome c1, heme protein, mitochondrial OS=Mus musculus OX=10090 GN=Cyc1 PE=1 SV=1	18	8	35.3	3.10256e+06	9382382	0.33068
High	Master Protein	Q7TQI3	Ubiquitin thioesterase OTUB1 OS=Mus musculus OX=10090 GN=Otub1 PE=1 SV=2	22	8	31.3	3.08723e+06	9.49816e+06	0.325034
High	Master Protein	Q6ZQ58	La-related protein 1 OS=Mus musculus OX=10090 GN=Larp1 PE=1 SV=3	17	13	121.1	3.08436e+06	1.11367e+07	0.276955
High	Master Protein	Q9ERD7	Tubulin beta-3 chain OS=Mus musculus OX=10090 GN=Tubb3 PE=1 SV=1	40	522	50.4	3.08145e+06	1.01919e+06	3.02343
High	Master Protein	Q8BYN5	FSD1-like protein OS=Mus musculus OX=10090 GN=Fsd1l PE=1 SV=2	19	10	56.9	3.07904e+06	1.3363e+07	0.230415
High	Master Protein	A2AF47	Dedicator of cytokinesis protein 11 OS=Mus musculus OX=10090 GN=Dock11 PE=1 SV=1	4	9	237.6	3.07844e+06	7.4055e+06	0.415696
High	Master Protein	Q8VBT0	Thioredoxin-related transmembrane protein 1 OS=Mus musculus OX=10090 GN=Tmx1 PE=1 SV=1	16	6	31.4	3.07694e+06	4.5263e+06	0.679791
High	Master Protein	Q8K298	Anillin OS=Mus musculus OX=10090 GN=Anln PE=1 SV=2	13	15	122.7	3.06199e+06	8.88529e+06	0.344613
High	Master Protein	P68510	14-3-3 protein eta OS=Mus musculus OX=10090 GN=Ywhah PE=1 SV=2	28	24	28.2	3.0491e+06	9.99244e+06	0.305141
High	Master Protein	Q02248	Catenin beta-1 OS=Mus musculus OX=10090 GN=Ctnnb1 PE=1 SV=1	16	17	85.4	3.04781e+06	6.28771e+06	0.484726
High	Master Protein	A2AN08	E3 ubiquitin-protein ligase UBR4 OS=Mus musculus OX=10090 GN=Ubr4 PE=1 SV=1	5	21	571.9	3.04329e+06	8.12398e+06	0.374606
High	Master Protein	P58404	Striatin-4 OS=Mus musculus OX=10090 GN=Strn4 PE=1 SV=2	13	12	81.6	3.04095e+06	1.13086e+07	0.268905
High	Master Protein	G3UXL2	Phosphoribosyl pyrophosphate synthetase 1-like 3 OS=Mus musculus OX=10090 GN=Prps1l3 PE=3 SV=1	30	12	34.8	3.04e+06	6.38487e+06	0.476126
High	Master Protein	Q8C4A5	Putative Polycomb group protein ASXL3 OS=Mus musculus OX=10090 GN=Asxl3 PE=2 SV=3	1	3	243.5	3.03567e+06	15749818	0.192743
High	Master Protein	O55022	Membrane-associated progesterone receptor component 1 OS=Mus musculus OX=10090 GN=Pgrmc1 PE=1 SV=4	28	11	21.7	3.03509e+06	9.89487e+06	0.306734
High	Master Protein	O08582	GTP-binding protein 1 OS=Mus musculus OX=10090 GN=Gtpbp1 PE=1 SV=2	25	12	72.3	3.02324e+06	1.10237e+07	0.27425
High	Master Protein	Q5SQ20	Pescadillo homolog OS=Mus musculus OX=10090 GN=Pes1 PE=1 SV=1	15	15	68.2	3.02169e+06	10162936	0.297325
High	Master Protein	P63163	Small nuclear ribonucleoprotein-associated protein N OS=Mus musculus OX=10090 GN=Snrpn PE=1 SV=1	15	7	24.6	3.02001e+06	5.77905e+06	0.52258
High	Master Protein	A0A0R4J0W6	Leucine rich repeat containing 40, isoform CRA_a OS=Mus musculus OX=10090 GN=Lrrc40 PE=1 SV=1	20	12	68	3.01494e+06	8.27236e+06	0.36446
High	Master Protein	Q8BJ05	Zinc finger CCCH domain-containing protein 14 OS=Mus musculus OX=10090 GN=Zc3h14 PE=1 SV=1	16	12	82.4	3.01343e+06	1.33298e+07	0.226067
High	Master Protein	P00493	Hypoxanthine-guanine phosphoribosyltransferase OS=Mus musculus OX=10090 GN=Hprt1 PE=1 SV=3	28	8	24.6	3.00725e+06	9.28117e+06	0.324016
High	Master Protein	Q8BTI8	Serine/arginine repetitive matrix protein 2 OS=Mus musculus OX=10090 GN=Srrm2 PE=1 SV=3	9	18	294.7	3.00531e+06	3.00305e+07	0.100075
High	Master Protein	Q8VEH5	EPM2A-interacting protein 1 OS=Mus musculus OX=10090 GN=Epm2aip1 PE=1 SV=1	11	5	70.1	3.0018e+06	2.74714e+06	1.0927
High	Master Protein	Q91Z50	Flap endonuclease 1 OS=Mus musculus OX=10090 GN=Fen1 PE=1 SV=1	34	14	42.6	3.00117e+06	1.96113e+07	0.153032
High	Master Protein	Q80XN0	D-beta-hydroxybutyrate dehydrogenase, mitochondrial OS=Mus musculus OX=10090 GN=Bdh1 PE=1 SV=2	18	7	38.3	2.98937e+06	7.96335e+06	0.375391
High	Master Protein	Q9Z2Q6	Septin-5 OS=Mus musculus OX=10090 GN=Sept5 PE=1 SV=2	20	10	42.7	2.9865e+06	1.47227e+07	0.202849
High	Master Protein	Q60520	Paired amphipathic helix protein Sin3a OS=Mus musculus OX=10090 GN=Sin3a PE=1 SV=3	13	13	145	2.94301e+06	1.0671e+07	0.275795
High	Master Protein	A2APB8	Targeting protein for Xklp2 OS=Mus musculus OX=10090 GN=Tpx2 PE=1 SV=1	25	20	85.8	2.93397e+06	1.90464e+07	0.154043
High	Master Protein	Q6PAR5	GTPase-activating protein and VPS9 domain-containing protein 1 OS=Mus musculus OX=10090 GN=Gapvd1 PE=1 SV=2	9	9	162.3	2.93127e+06	1.59843e+07	0.183385
High	Master Protein	A0A0R4J098	Zinc finger protein 326 OS=Mus musculus OX=10090 GN=Zfp326 PE=1 SV=1	16	13	65.1	2.92908e+06	1.08213e+07	0.270677
High	Master Protein	Q99ME9	Nucleolar GTP-binding protein 1 OS=Mus musculus OX=10090 GN=Gtpbp4 PE=1 SV=3	20	13	74.1	2.91593e+06	2.23882e+07	0.130244
High	Master Protein	Q91ZJ5	UTP--glucose-1-phosphate uridylyltransferase OS=Mus musculus OX=10090 GN=Ugp2 PE=1 SV=3	13	7	56.9	2.90994e+06	9.27175e+06	0.31385
High	Master Protein	D3Z3G6	Mitogen-activated protein kinase OS=Mus musculus OX=10090 GN=Mapk3 PE=1 SV=1	20	8	42.4	2.89715e+06	8.41605e+06	0.344241
High	Master Protein	Q8VE33	Ganglioside-induced differentiation-associated protein 1-like 1 OS=Mus musculus OX=10090 GN=Gdap1l1 PE=1 SV=1	22	7	42.3	2.87285e+06	1.22421e+07	0.234669
High	Master Protein	Q8BU03	Periodic tryptophan protein 2 homolog OS=Mus musculus OX=10090 GN=Pwp2 PE=1 SV=1	14	11	102.8	2.86648e+06	1.11259e+07	0.257641
High	Master Protein	Q6A0A2	La-related protein 4B OS=Mus musculus OX=10090 GN=Larp4b PE=1 SV=2	13	11	81.6	2.86445e+06	1.16766e+07	0.245315
High	Master Protein	P33174	Chromosome-associated kinesin KIF4 OS=Mus musculus OX=10090 GN=Kif4 PE=1 SV=3	8	13	139.4	2.86326e+06	1.01144e+07	0.283087
High	Master Protein	Q8BVG4	Dipeptidyl peptidase 9 OS=Mus musculus OX=10090 GN=Dpp9 PE=1 SV=2	11	9	97.9	2.86263e+06	6.10149e+06	0.469169
High	Master Protein	Q8R326	Paraspeckle component 1 OS=Mus musculus OX=10090 GN=Pspc1 PE=1 SV=1	18	8	58.7	2.85707e+06	1.45014e+07	0.19702
High	Master Protein	Q9DCX2	ATP synthase subunit d, mitochondrial OS=Mus musculus OX=10090 GN=Atp5h PE=1 SV=3	46	5	18.7	2.85268e+06	2.069e+07	0.137877
High	Master Protein	A0A1B0GSU0	Aldehyde dehydrogenase family 16 member A1 OS=Mus musculus OX=10090 GN=Aldh16a1 PE=1 SV=1	10	9	84.7	2.84361e+06	7.12441e+06	0.399136
High	Master Protein	Q9QZD9	Eukaryotic translation initiation factor 3 subunit I OS=Mus musculus OX=10090 GN=Eif3i PE=1 SV=1	23	8	36.4	2.84039e+06	7.72061e+06	0.367897
High	Master Protein	E9Q1P8	Interferon regulatory factor 2-binding protein 2 OS=Mus musculus OX=10090 GN=Irf2bp2 PE=1 SV=1	22	13	59.3	2.83174e+06	1.64629e+07	0.172008
High	Master Protein	Q3UE92	X-prolyl aminopeptidase (Aminopeptidase P) 1, soluble, isoform CRA_b OS=Mus musculus OX=10090 GN=Xpnpep1 PE=1 SV=1	15	9	74.5	2.83033e+06	9.95415e+06	0.284337
High	Master Protein	Q99LE6	ATP-binding cassette sub-family F member 2 OS=Mus musculus OX=10090 GN=Abcf2 PE=1 SV=1	4	2	71.7	2.80067e+06	2.12225e+06	1.31967
High	Master Protein	Q5SRX1	TOM1-like protein 2 OS=Mus musculus OX=10090 GN=Tom1l2 PE=1 SV=1	34	13	55.6	2.79715e+06	1.00175e+07	0.279225
High	Master Protein	A2A432	Cullin-4B OS=Mus musculus OX=10090 GN=Cul4b PE=1 SV=1	15	18	110.6	2.79419e+06	1.5167e+07	0.184229
High	Master Protein	P51125	Calpastatin OS=Mus musculus OX=10090 GN=Cast PE=1 SV=2	29	17	84.9	2.78829e+06	1.45724e+07	0.19134
High	Master Protein	Q3UHD6	Sorting nexin-27 OS=Mus musculus OX=10090 GN=Snx27 PE=1 SV=2	14	8	61	2.77962e+06	6.70375e+06	0.414637
High	Master Protein	E9QPI5	Sister chromatid cohesion protein PDS5 homolog A OS=Mus musculus OX=10090 GN=Pds5a PE=1 SV=1	11	12	150.1	2.77504e+06	7.82934e+06	0.354441
High	Master Protein	D3Z3N4	Heterogeneous nuclear ribonucleoprotein H3 OS=Mus musculus OX=10090 GN=Hnrnph3 PE=1 SV=1	18	12	36.8	2.76429e+06	8.51591e+06	0.324604
High	Master Protein	P62137	Serine/threonine-protein phosphatase PP1-alpha catalytic subunit OS=Mus musculus OX=10090 GN=Ppp1ca PE=1 SV=1	35	10	37.5	2.76227e+06	1.12476e+07	0.245587
High	Master Protein	P06801	NADP-dependent malic enzyme OS=Mus musculus OX=10090 GN=Me1 PE=1 SV=2	23	13	63.9	2.748e+06	1.02915e+07	0.267016
High	Master Protein	P63158	High mobility group protein B1 OS=Mus musculus OX=10090 GN=Hmgb1 PE=1 SV=2	48	17	24.9	2.7348e+06	3.19114e+07	0.0856998
High	Master Protein	P00375	Dihydrofolate reductase OS=Mus musculus OX=10090 GN=Dhfr PE=1 SV=3	25	5	21.6	2.73432e+06	7.97907e+06	0.342687
High	Master Protein	Q3TAQ9	WD repeat domain 36 OS=Mus musculus OX=10090 GN=Wdr36 PE=1 SV=1	7	5	99.7	2.73037e+06	4.38431e+06	0.622759
High	Master Protein	Q3UYI5	Ral guanine nucleotide dissociation stimulator-like 3 OS=Mus musculus OX=10090 GN=Rgl3 PE=1 SV=2	20	12	77.9	2.72729e+06	9.08443e+06	0.300216
High	Master Protein	P97807	Fumarate hydratase, mitochondrial OS=Mus musculus OX=10090 GN=Fh PE=1 SV=3	16	11	54.3	2.7174e+06	1.00525e+07	0.27032
High	Master Protein	Q3B7Z2	Oxysterol-binding protein 1 OS=Mus musculus OX=10090 GN=Osbp PE=1 SV=3	19	9	88.7	2.7072e+06	8.51908e+06	0.317781
High	Master Protein	Q80X50	Ubiquitin-associated protein 2-like OS=Mus musculus OX=10090 GN=Ubap2l PE=1 SV=1	11	11	116.7	2.70034e+06	9.88563e+06	0.273158
High	Master Protein	B1AX58	Plastin-3 OS=Mus musculus OX=10090 GN=Pls3 PE=1 SV=1	24	15	71.7	2.69483e+06	1.05249e+07	0.256044
High	Master Protein	Q8VDW0	ATP-dependent RNA helicase DDX39A OS=Mus musculus OX=10090 GN=Ddx39a PE=1 SV=1	24	20	49	2.67562e+06	7631725	0.350592
High	Master Protein	Q8R0X7	Sphingosine-1-phosphate lyase 1 OS=Mus musculus OX=10090 GN=Sgpl1 PE=1 SV=1	16	9	63.6	2.67266e+06	1.07818e+07	0.247887
High	Master Protein	Q9ER72	Cysteine--tRNA ligase, cytoplasmic OS=Mus musculus OX=10090 GN=Cars PE=1 SV=2	17	13	94.8	2.66959e+06	1.29298e+07	0.206468
High	Master Protein	P63276	40S ribosomal protein S17 OS=Mus musculus OX=10090 GN=Rps17 PE=1 SV=2	51	10	15.5	2.66847e+06	1.67257e+07	0.159543
High	Master Protein	Q8BY89	Choline transporter-like protein 2 OS=Mus musculus OX=10090 GN=Slc44a2 PE=1 SV=2	7	5	80.1	2.65637e+06	2.67107e+06	0.994497
High	Master Protein	Q9Z1M8	Protein Red OS=Mus musculus OX=10090 GN=Ik PE=1 SV=2	26	14	65.6	2.64157e+06	1.46961e+07	0.179746
High	Master Protein	Q61644	Protein kinase C and casein kinase substrate in neurons protein 1 OS=Mus musculus OX=10090 GN=Pacsin1 PE=1 SV=1	23	10	50.5	2.64137e+06	9.30866e+06	0.283754
High	Master Protein	P62301	40S ribosomal protein S13 OS=Mus musculus OX=10090 GN=Rps13 PE=1 SV=2	38	6	17.2	2.64042e+06	1.40857e+07	0.187453
High	Master Protein	Q9Z2I0	Mitochondrial proton/calcium exchanger protein OS=Mus musculus OX=10090 GN=Letm1 PE=1 SV=1	20	12	82.9	2.64022e+06	1.07691e+07	0.245166
High	Master Protein	Q9CZ30	Obg-like ATPase 1 OS=Mus musculus OX=10090 GN=Ola1 PE=1 SV=1	12	7	44.7	2.63649e+06	9.55681e+06	0.275876
High	Master Protein	Q8BGH2	Sorting and assembly machinery component 50 homolog OS=Mus musculus OX=10090 GN=Samm50 PE=1 SV=1	10	4	51.8	2.62113e+06	6.1508e+06	0.426144
High	Master Protein	Q8R3N6	THO complex subunit 1 OS=Mus musculus OX=10090 GN=Thoc1 PE=1 SV=1	5	7	75.4	2.61617e+06	6.50928e+06	0.401914
High	Master Protein	Q91V55	40S ribosomal protein S5 OS=Mus musculus OX=10090 GN=Rps5 PE=1 SV=1	16	6	22.9	2.60137e+06	3.41228e+06	0.762355
High	Master Protein	Q8BTV2	Cleavage and polyadenylation specificity factor subunit 7 OS=Mus musculus OX=10090 GN=Cpsf7 PE=1 SV=2	18	8	52	2.60053e+06	9.75317e+06	0.266635
High	Master Protein	Q60973	Histone-binding protein RBBP7 OS=Mus musculus OX=10090 GN=Rbbp7 PE=1 SV=1	17	10	47.8	2.59973e+06	1.12922e+07	0.230223
High	Master Protein	Q9D394	Protein RUFY3 OS=Mus musculus OX=10090 GN=Rufy3 PE=1 SV=1	17	7	53	2.59926e+06	7257638	0.358141
High	Master Protein	Q9JJ28	Protein flightless-1 homolog OS=Mus musculus OX=10090 GN=Flii PE=1 SV=1	9	11	144.7	2.59683e+06	6.61124e+06	0.39279
High	Master Protein	Q8K3X4	Interferon regulatory factor 2-binding protein-like OS=Mus musculus OX=10090 GN=Irf2bpl PE=1 SV=1	13	11	80.5	2.5958e+06	7.22702e+06	0.359179
High	Master Protein	Q8K1M3	Protein kinase, cAMP dependent regulatory, type II alpha OS=Mus musculus OX=10090 GN=Prkar2a PE=1 SV=1	24	9	45.6	2.58208e+06	8.72616e+06	0.295901
High	Master Protein	P20357	Microtubule-associated protein 2 OS=Mus musculus OX=10090 GN=Map2 PE=1 SV=2	10	17	199	2.5808e+06	2.48777e+07	0.103739
High	Master Protein	Q8K2T1	NmrA-like family domain-containing protein 1 OS=Mus musculus OX=10090 GN=Nmral1 PE=1 SV=1	11	3	34.4	2.57998e+06	5.66268e+06	0.455612
High	Master Protein	Q9EQF6	Dihydropyrimidinase-related protein 5 OS=Mus musculus OX=10090 GN=Dpysl5 PE=1 SV=1	25	10	61.5	2.56943e+06	1.00822e+07	0.254849
High	Master Protein	Q07235	Glia-derived nexin OS=Mus musculus OX=10090 GN=Serpine2 PE=1 SV=2	16	6	44.2	2.56774e+06	7.50355e+06	0.342204
High	Master Protein	V9GX06	Predicted gene 11214 (Fragment) OS=Mus musculus OX=10090 GN=Gm11214 PE=1 SV=1	17	85	19.9	2.5574e+06		#VALUE!
High	Master Protein	Q9JHI5	Isovaleryl-CoA dehydrogenase, mitochondrial OS=Mus musculus OX=10090 GN=Ivd PE=1 SV=1	13	5	46.3	2.5549e+06	5.25421e+06	0.486257
High	Master Protein	Q8BJY1	26S proteasome non-ATPase regulatory subunit 5 OS=Mus musculus OX=10090 GN=Psmd5 PE=1 SV=4	20	11	55.9	2.55171e+06	9.31055e+06	0.274066
High	Master Protein	Q8BJ71	Nuclear pore complex protein Nup93 OS=Mus musculus OX=10090 GN=Nup93 PE=1 SV=1	9	8	93.2	2.54671e+06	6.99744e+06	0.363948
High	Master Protein	P49586	Choline-phosphate cytidylyltransferase A OS=Mus musculus OX=10090 GN=Pcyt1a PE=1 SV=1	23	8	41.6	2.54299e+06	1.03653e+07	0.245338
High	Master Protein	A0A0R4J0B4	Cytidine monophospho-N-acetylneuraminic acid synthetase OS=Mus musculus OX=10090 GN=Cmas PE=1 SV=1	15	9	48	2.53167e+06	7.1403e+06	0.354561
High	Master Protein	Q91YT0	NADH dehydrogenase [ubiquinone] flavoprotein 1, mitochondrial OS=Mus musculus OX=10090 GN=Ndufv1 PE=1 SV=1	18	10	50.8	2.52339e+06	1.22656e+07	0.205729
High	Master Protein	Q80SW1	S-adenosylhomocysteine hydrolase-like protein 1 OS=Mus musculus OX=10090 GN=Ahcyl1 PE=1 SV=1	13	11	58.9	2.51716e+06	4.77571e+06	0.527076
High	Master Protein	Q9EP69	Phosphatidylinositide phosphatase SAC1 OS=Mus musculus OX=10090 GN=Sacm1l PE=1 SV=1	10	8	66.9	2.51701e+06	5.83286e+06	0.431523
High	Master Protein	P19157	Glutathione S-transferase P 1 OS=Mus musculus OX=10090 GN=Gstp1 PE=1 SV=2	25	12	23.6	2.5071e+06	1.34053e+07	0.187023
High	Master Protein	Q9JJY3	Sphingomyelin phosphodiesterase 3 OS=Mus musculus OX=10090 GN=Smpd3 PE=1 SV=1	11	8	71.2	2.50559e+06	4.00922e+06	0.624957
High	Master Protein	P28738	Kinesin heavy chain isoform 5C OS=Mus musculus OX=10090 GN=Kif5c PE=1 SV=3	27	34	109.2	2.50227e+06	1.00627e+07	0.248668
High	Master Protein	Q9WUP7	Ubiquitin carboxyl-terminal hydrolase isozyme L5 OS=Mus musculus OX=10090 GN=Uchl5 PE=1 SV=2	16	5	37.6	2.50137e+06	6.46171e+06	0.387106
High	Master Protein	Q6PDG5	SWI/SNF complex subunit SMARCC2 OS=Mus musculus OX=10090 GN=Smarcc2 PE=1 SV=2	12	14	132.5	2.49898e+06	8.14648e+06	0.306756
High	Master Protein	Q6ZPR5	Sphingomyelin phosphodiesterase 4 OS=Mus musculus OX=10090 GN=Smpd4 PE=1 SV=2	8	6	93.2	2.49858e+06	5.9429e+06	0.42043
High	Master Protein	Q9CRT8	Exportin-T OS=Mus musculus OX=10090 GN=Xpot PE=1 SV=3	10	13	109.7	2.48345e+06	7.05516e+06	0.352004
High	Master Protein	Q8K212	Phosphofurin acidic cluster sorting protein 1 OS=Mus musculus OX=10090 GN=Pacs1 PE=1 SV=2	19	14	104.8	2.48065e+06	9.40765e+06	0.263685
High	Master Protein	Q3TAA7	Serine/threonine-protein kinase 11-interacting protein OS=Mus musculus OX=10090 GN=Stk11ip PE=1 SV=1	10	10	117.9	2.47148e+06	3.93892e+06	0.627452
High	Master Protein	P14115	60S ribosomal protein L27a OS=Mus musculus OX=10090 GN=Rpl27a PE=1 SV=5	16	3	16.6	2.47113e+06	1.20919e+07	0.204363
High	Master Protein	P70404	Isocitrate dehydrogenase [NAD] subunit gamma 1, mitochondrial OS=Mus musculus OX=10090 GN=Idh3g PE=1 SV=1	18	7	42.8	2.47075e+06	8.05414e+06	0.306768
High	Master Protein	P61358	60S ribosomal protein L27 OS=Mus musculus OX=10090 GN=Rpl27 PE=1 SV=2	21	5	15.8	2.46678e+06	1.65766e+07	0.148811
High	Master Protein	P30681	High mobility group protein B2 OS=Mus musculus OX=10090 GN=Hmgb2 PE=1 SV=3	54	16	24.1	2.44866e+06	3.90519e+07	0.0627027
High	Master Protein	P11438	Lysosome-associated membrane glycoprotein 1 OS=Mus musculus OX=10090 GN=Lamp1 PE=1 SV=2	6	3	43.8	2448361	7.12866e+06	0.343453
High	Master Protein	Q91XU0	ATPase WRNIP1 OS=Mus musculus OX=10090 GN=Wrnip1 PE=1 SV=2	6	5	71.7	2441992	5.05184e+06	0.483386
High	Master Protein	Q8K411	Presequence protease, mitochondrial OS=Mus musculus OX=10090 GN=Pitrm1 PE=1 SV=1	8	8	117.3	2.44171e+06	6.14482e+06	0.39736
High	Master Protein	P17563	Methanethiol oxidase OS=Mus musculus OX=10090 GN=Selenbp1 PE=1 SV=2	15	11	52.5	2.43916e+06	6.00986e+06	0.40586
High	Master Protein	Q62266	Cornifin-A OS=Mus musculus OX=10090 GN=Sprr1a PE=1 SV=1	56	6	15.8	2.43887e+06	4.14264e+06	0.588722
High	Master Protein	Q9JKX6	ADP-sugar pyrophosphatase OS=Mus musculus OX=10090 GN=Nudt5 PE=1 SV=1	19	4	24	2.43496e+06	7.20592e+06	0.337911
High	Master Protein	P42232	Signal transducer and activator of transcription 5B OS=Mus musculus OX=10090 GN=Stat5b PE=1 SV=1	10	9	89.9	2.42058e+06	8.35005e+06	0.289888
High	Master Protein	Q61578	NADPH:adrenodoxin oxidoreductase, mitochondrial OS=Mus musculus OX=10090 GN=Fdxr PE=1 SV=1	16	8	54.2	2.41664e+06	7.5738e+06	0.319079
High	Master Protein	Q8BYA0	Tubulin-specific chaperone D OS=Mus musculus OX=10090 GN=Tbcd PE=1 SV=1	12	11	133.2	2.41347e+06	4.10832e+06	0.58746
High	Master Protein	P14576	Signal recognition particle 54 kDa protein OS=Mus musculus OX=10090 GN=Srp54 PE=1 SV=2	20	11	55.7	2.41111e+06	9.58375e+06	0.251583
High	Master Protein	Q9EQQ9	Protein O-GlcNAcase OS=Mus musculus OX=10090 GN=Mgea5 PE=1 SV=2	13	10	103.1	2.40609e+06	6.84339e+06	0.351593
High	Master Protein	Q9R0L6	Pericentriolar material 1 protein OS=Mus musculus OX=10090 GN=Pcm1 PE=1 SV=2	4	8	228.7	2.40272e+06	4.73017e+06	0.507957
High	Master Protein	Q91YT7	YTH domain-containing family protein 2 OS=Mus musculus OX=10090 GN=Ythdf2 PE=1 SV=1	11	8	62.2	2.39013e+06	7.46449e+06	0.3202
High	Master Protein	Q8K4Z3	NAD(P)H-hydrate epimerase OS=Mus musculus OX=10090 GN=Naxe PE=1 SV=1	22	7	31	2.37794e+06	1.13534e+07	0.209448
High	Master Protein	Q91UZ1	Phosphoinositide phospholipase C OS=Mus musculus OX=10090 GN=Plcb4 PE=1 SV=1	10	14	134.4	2.37491e+06	8.58407e+06	0.276665
High	Master Protein	Q6P542	ATP-binding cassette sub-family F member 1 OS=Mus musculus OX=10090 GN=Abcf1 PE=1 SV=1	21	19	94.9	2.37166e+06	1.62938e+07	0.145556
High	Master Protein	Q91WG4	Elongator complex protein 2 OS=Mus musculus OX=10090 GN=Elp2 PE=1 SV=1	5	4	93	2.3596e+06	5.4628e+06	0.431939
High	Master Protein	Q9WUP4	Polyprenol reductase OS=Mus musculus OX=10090 GN=Srd5a3 PE=1 SV=2	7	3	37.9	2356710	1.14722e+06	2.05427
High	Master Protein	A2AGT5	Cytoskeleton-associated protein 5 OS=Mus musculus OX=10090 GN=Ckap5 PE=1 SV=1	10	19	225.5	2.35557e+06	9.67856e+06	0.24338
High	Master Protein	P52624	Uridine phosphorylase 1 OS=Mus musculus OX=10090 GN=Upp1 PE=1 SV=2	7	2	34.1	2.32695e+06	1.45901e+06	1.59489
High	Master Protein	P63330	Serine/threonine-protein phosphatase 2A catalytic subunit alpha isoform OS=Mus musculus OX=10090 GN=Ppp2ca PE=1 SV=1	26	7	35.6	2.31995e+06	4.39396e+06	0.527987
High	Master Protein	P28352	DNA-(apurinic or apyrimidinic site) lyase OS=Mus musculus OX=10090 GN=Apex1 PE=1 SV=2	27	8	35.5	2.31538e+06	1.27623e+07	0.181423
High	Master Protein	Q9JII6	Alcohol dehydrogenase [NADP(+)] OS=Mus musculus OX=10090 GN=Akr1a1 PE=1 SV=3	19	6	36.6	2.30714e+06	9294928	0.248214
High	Master Protein	Q8K394	Inactive phospholipase C-like protein 2 OS=Mus musculus OX=10090 GN=Plcl2 PE=1 SV=2	9	12	125.7	2.2833e+06	8.63421e+06	0.264449
High	Master Protein	O70251	Elongation factor 1-beta OS=Mus musculus OX=10090 GN=Eef1b PE=1 SV=5	10	3	24.7	2.2797e+06	7.94818e+06	0.28682
High	Master Protein	E9PY39	Predicted gene 20431 OS=Mus musculus OX=10090 GN=Gm20431 PE=3 SV=1	10	4	42.1	2.27707e+06	8.66754e+06	0.262712
High	Master Protein	P60867	40S ribosomal protein S20 OS=Mus musculus OX=10090 GN=Rps20 PE=1 SV=1	23	3	13.4	2275299	1.03907e+07	0.218975
High	Master Protein	Q8K019	Bcl-2-associated transcription factor 1 OS=Mus musculus OX=10090 GN=Bclaf1 PE=1 SV=2	10	10	105.9	2.26941e+06	2.11119e+07	0.107494
High	Master Protein	F8VQC1	Signal recognition particle subunit SRP72 OS=Mus musculus OX=10090 GN=Srp72 PE=1 SV=1	23	14	74.6	2267597	1.67728e+07	0.135195
High	Master Protein	A0A1Y7VN19	Dehydrogenase/reductase SDR family member 7 (Fragment) OS=Mus musculus OX=10090 GN=Dhrs7 PE=1 SV=1	18	6	40.7	2.25436e+06	5.52941e+06	0.407703
High	Master Protein	Q9Z315	U4/U6.U5 tri-snRNP-associated protein 1 OS=Mus musculus OX=10090 GN=Sart1 PE=1 SV=1	18	14	90.8	2.25307e+06	1.09763e+07	0.205267
High	Master Protein	Q5RJH2	Multiple C2 and transmembrane domain-containing protein 2 OS=Mus musculus OX=10090 GN=Mctp2 PE=2 SV=1	2	3	100.1	2.25026e+06	3.23381e+06	0.695852
High	Master Protein	A0A2C9F2D2	Annexin OS=Mus musculus OX=10090 GN=Anxa7 PE=1 SV=1	14	9	52.2	2.24891e+06	5.3723e+06	0.418612
High	Master Protein	Q3UVL4	Vacuolar protein sorting-associated protein 51 homolog OS=Mus musculus OX=10090 GN=Vps51 PE=1 SV=2	8	8	86.1	2.24753e+06	4.39222e+06	0.511706
High	Master Protein	Q9D8C2	Tetraspanin-13 OS=Mus musculus OX=10090 GN=Tspan13 PE=1 SV=1	19	5	22.2	2.2443e+06	3.68752e+06	0.608622
High	Master Protein	B1AT82	MCG6846, isoform CRA_c OS=Mus musculus OX=10090 GN=Prpsap1 PE=1 SV=1	25	10	42.4	2.24338e+06	8.19644e+06	0.273701
High	Master Protein	P82343	N-acylglucosamine 2-epimerase OS=Mus musculus OX=10090 GN=Renbp PE=1 SV=3	6	4	49.7	2.23978e+06	5.36747e+06	0.417288
High	Master Protein	Q8BWY3	Eukaryotic peptide chain release factor subunit 1 OS=Mus musculus OX=10090 GN=Etf1 PE=1 SV=4	22	10	49	2.23619e+06	1.16143e+07	0.192538
High	Master Protein	Q99P88	Nuclear pore complex protein Nup155 OS=Mus musculus OX=10090 GN=Nup155 PE=1 SV=1	8	10	155	2.23246e+06	3263627	0.684041
High	Master Protein	D3Z656	Synaptojanin-1 OS=Mus musculus OX=10090 GN=Synj1 PE=1 SV=1	16	18	176.2	2.22632e+06	8.87543e+06	0.250841
High	Master Protein	E9QMP6	Non-specific serine/threonine protein kinase OS=Mus musculus OX=10090 GN=Mark2 PE=1 SV=2	12	9	86.3	2.2244e+06	7.39542e+06	0.30078
High	Master Protein	Q5SWZ5	Myosin phosphatase Rho-interacting protein OS=Mus musculus OX=10090 GN=Mprip PE=1 SV=1	2	3	257.1	2.22307e+06	1.01162e+07	0.219752
High	Master Protein	P56960	Exosome component 10 OS=Mus musculus OX=10090 GN=Exosc10 PE=1 SV=2	20	16	100.9	2.21799e+06	1.11539e+07	0.198854
High	Master Protein	P35951	Low-density lipoprotein receptor OS=Mus musculus OX=10090 GN=Ldlr PE=1 SV=2	11	10	94.9	2203513	6.38972e+06	0.344853
High	Master Protein	Q9DC69	NADH dehydrogenase [ubiquinone] 1 alpha subcomplex subunit 9, mitochondrial OS=Mus musculus OX=10090 GN=Ndufa9 PE=1 SV=2	32	12	42.5	2.20134e+06	1.76253e+07	0.124896
High	Master Protein	Q61205	Platelet-activating factor acetylhydrolase IB subunit gamma OS=Mus musculus OX=10090 GN=Pafah1b3 PE=1 SV=1	11	4	25.8	2.19597e+06	5.40365e+06	0.406387
High	Master Protein	Q9R1C7	Pre-mRNA-processing factor 40 homolog A OS=Mus musculus OX=10090 GN=Prpf40a PE=1 SV=1	15	15	108.4	2.19502e+06	1.16654e+07	0.188165
High	Master Protein	A0A0R4J187	X-ray repair cross-complementing protein 6 OS=Mus musculus OX=10090 GN=Xrcc6 PE=1 SV=1	21	13	69.4	2.18989e+06	1.07508e+07	0.203696
High	Master Protein	Q9D662	Protein transport protein Sec23B OS=Mus musculus OX=10090 GN=Sec23b PE=1 SV=1	12	9	86.4	2.17775e+06	5.26322e+06	0.413767
High	Master Protein	P61982	14-3-3 protein gamma OS=Mus musculus OX=10090 GN=Ywhag PE=1 SV=2	46	26	28.3	2.17394e+06	5.99396e+06	0.362689
High	Master Protein	Q8R3C0	Mini-chromosome maintenance complex-binding protein OS=Mus musculus OX=10090 GN=Mcmbp PE=1 SV=1	11	6	72.8	2.17327e+06	4.45614e+06	0.487702
High	Master Protein	Q9R013	Cathepsin F OS=Mus musculus OX=10090 GN=Ctsf PE=1 SV=1	17	7	51.6	2.16932e+06	4.71919e+06	0.459681
High	Master Protein	Q99PP7	E3 ubiquitin-protein ligase TRIM33 OS=Mus musculus OX=10090 GN=Trim33 PE=1 SV=2	17	12	123.8	2.16913e+06	9.61948e+06	0.225494
High	Master Protein	E9Q9J4	Inositol hexakisphosphate and diphosphoinositol-pentakisphosphate kinase 2 OS=Mus musculus OX=10090 GN=Ppip5k2 PE=1 SV=1	6	8	140.3	2.16362e+06	5.78136e+06	0.374241
High	Master Protein	P50220	Homeobox protein Nkx-2.1 OS=Mus musculus OX=10090 GN=Nkx2-1 PE=2 SV=1	13	5	38.5	2.1604e+06	1.0975e+07	0.196846
High	Master Protein	Q3UMW8	Ceroid-lipofuscinosis neuronal protein 5 homolog OS=Mus musculus OX=10090 GN=Cln5 PE=1 SV=1	11	7	39.3	2.15612e+06	8.52587e+06	0.252891
High	Master Protein	O35593	26S proteasome non-ATPase regulatory subunit 14 OS=Mus musculus OX=10090 GN=Psmd14 PE=1 SV=2	15	5	34.6	2.15009e+06	4.13166e+06	0.520393
High	Master Protein	Q9Z0S1	3'(2'),5'-bisphosphate nucleotidase 1 OS=Mus musculus OX=10090 GN=Bpnt1 PE=1 SV=2	22	7	33.2	2.1472e+06	6.3364e+06	0.338867
High	Master Protein	Q3UVG3	Protein FAM91A1 OS=Mus musculus OX=10090 GN=Fam91a1 PE=1 SV=1	7	7	93.4	2.1426e+06	6.43836e+06	0.332787
High	Master Protein	Q68FF6	ARF GTPase-activating protein GIT1 OS=Mus musculus OX=10090 GN=Git1 PE=1 SV=1	10	9	85.2	2.13736e+06	6.79872e+06	0.314377
High	Master Protein	Q9CZU3	Exosome RNA helicase MTR4 OS=Mus musculus OX=10090 GN=Mtrex PE=1 SV=1	8	11	117.6	2.13128e+06	8.08607e+06	0.263574
High	Master Protein	P58854	Gamma-tubulin complex component 3 OS=Mus musculus OX=10090 GN=Tubgcp3 PE=1 SV=2	10	6	103.4	2.12878e+06	4.70703e+06	0.452257
High	Master Protein	Q8R3Y8	Interferon regulatory factor 2-binding protein 1 OS=Mus musculus OX=10090 GN=Irf2bp1 PE=1 SV=2	22	10	61.7	2.12328e+06	6.16496e+06	0.344412
High	Master Protein	E9PUL3	Chloride channel accessory 3B OS=Mus musculus OX=10090 GN=Clca3b PE=1 SV=1	12	15	112.6	2.11658e+06	4.66353e+06	0.453858
High	Master Protein	Q61206	Platelet-activating factor acetylhydrolase IB subunit beta OS=Mus musculus OX=10090 GN=Pafah1b2 PE=1 SV=2	12	5	25.6	2.11598e+06	5.57115e+06	0.379811
High	Master Protein	P58871	182 kDa tankyrase-1-binding protein OS=Mus musculus OX=10090 GN=Tnks1bp1 PE=1 SV=2	17	20	181.7	2.10927e+06	7.83818e+06	0.269102
High	Master Protein	P52479	Ubiquitin carboxyl-terminal hydrolase 10 OS=Mus musculus OX=10090 GN=Usp10 PE=1 SV=3	14	8	87	2.10926e+06	8.39735e+06	0.251181
High	Master Protein	Q9Z2D6	Methyl-CpG-binding protein 2 OS=Mus musculus OX=10090 GN=Mecp2 PE=1 SV=1	30	15	52.3	2.10218e+06	2.01187e+07	0.104489
High	Master Protein	A0A0R4J2C2	Synaptotagmin II OS=Mus musculus OX=10090 GN=Syt2 PE=1 SV=1	19	6	47.2	2.1011e+06	6.74208e+06	0.31164
High	Master Protein	Q8VI75	Importin-4 OS=Mus musculus OX=10090 GN=Ipo4 PE=1 SV=1	4	8	119.2	2.09697e+06	2.67951e+06	0.782593
High	Master Protein	Q8C5L3	CCR4-NOT transcription complex subunit 2 OS=Mus musculus OX=10090 GN=Cnot2 PE=1 SV=2	11	7	59.7	2.09178e+06	8.26516e+06	0.253085
High	Master Protein	Q8BYH7	TBC1 domain family member 17 OS=Mus musculus OX=10090 GN=Tbc1d17 PE=1 SV=2	4	2	72.8	2.09113e+06	2.13776e+06	0.978186
High	Master Protein	Q9WUU7	Cathepsin Z OS=Mus musculus OX=10090 GN=Ctsz PE=1 SV=1	6	3	34	2.08245e+06	3.81351e+06	0.546072
High	Master Protein	Q9EQ28	DNA polymerase delta subunit 3 OS=Mus musculus OX=10090 GN=Pold3 PE=1 SV=2	22	10	50.8	2.08217e+06	1.13602e+07	0.183286
High	Master Protein	Q8BG32	26S proteasome non-ATPase regulatory subunit 11 OS=Mus musculus OX=10090 GN=Psmd11 PE=1 SV=3	19	10	47.4	2.07931e+06	6.9962e+06	0.297205
High	Master Protein	Q9QXV1	Chromobox protein homolog 8 OS=Mus musculus OX=10090 GN=Cbx8 PE=1 SV=1	37	12	39.8	2.07565e+06	1.21318e+07	0.171092
High	Master Protein	D3YWN7	Ensconsin OS=Mus musculus OX=10090 GN=Map7 PE=1 SV=2	10	10	82.8	2.0635e+06	1.11098e+07	0.185737
High	Master Protein	Q9CT10	Ran-binding protein 3 OS=Mus musculus OX=10090 GN=Ranbp3 PE=1 SV=2	19	12	52.5	2.06202e+06	6.43112e+06	0.320631
High	Master Protein	Q8CIP5	Protein dispatched homolog 2 OS=Mus musculus OX=10090 GN=Disp2 PE=1 SV=1	3	6	147.8	2.05216e+06	3.18606e+06	0.644108
High	Master Protein	Q3UYV9	Nuclear cap-binding protein subunit 1 OS=Mus musculus OX=10090 GN=Ncbp1 PE=1 SV=2	11	9	91.9	2.04658e+06	8.35737e+06	0.244883
High	Master Protein	P05063	Fructose-bisphosphate aldolase C OS=Mus musculus OX=10090 GN=Aldoc PE=1 SV=4	44	11	39.4	2.04363e+06	7.57253e+06	0.269874
High	Master Protein	Q3U186	Probable arginine--tRNA ligase, mitochondrial OS=Mus musculus OX=10090 GN=Rars2 PE=1 SV=1	6	3	65.3	2.0288e+06	761190	2.6653
High	Master Protein	Q9QXG2	Rab proteins geranylgeranyltransferase component A 1 OS=Mus musculus OX=10090 GN=Chm PE=1 SV=1	11	6	73.9	2.02256e+06	2.62361e+06	0.770909
High	Master Protein	Q8K224	RNA cytidine acetyltransferase OS=Mus musculus OX=10090 GN=Nat10 PE=1 SV=1	8	8	115.3	2.02245e+06	6.53646e+06	0.309411
High	Master Protein	Q9QYI3	DnaJ homolog subfamily C member 7 OS=Mus musculus OX=10090 GN=Dnajc7 PE=1 SV=2	11	8	56.4	2.02237e+06	5.65303e+06	0.357749
High	Master Protein	Q8BI08	Protein MAL2 OS=Mus musculus OX=10090 GN=Mal2 PE=1 SV=1	6	2	19.1	2.0053e+06	3.73732e+06	0.536563
High	Master Protein	Q5FWK3	Rho GTPase-activating protein 1 OS=Mus musculus OX=10090 GN=Arhgap1 PE=1 SV=1	19	6	50.4	1.99771e+06	7.34012e+06	0.272163
High	Master Protein	P35564	Calnexin OS=Mus musculus OX=10090 GN=Canx PE=1 SV=1	17	12	67.2	1.99519e+06	1.0069e+07	0.198153
High	Master Protein	Q8CC88	von Willebrand factor A domain-containing protein 8 OS=Mus musculus OX=10090 GN=Vwa8 PE=1 SV=2	7	13	213.3	1.99384e+06	6.58954e+06	0.302577
High	Master Protein	P63239	Neuroendocrine convertase 1 OS=Mus musculus OX=10090 GN=Pcsk1 PE=1 SV=1	9	7	84.1	1.99226e+06	8.39605e+06	0.237286
High	Master Protein	Q9Z160	Conserved oligomeric Golgi complex subunit 1 OS=Mus musculus OX=10090 GN=Cog1 PE=1 SV=3	5	5	109	1.98773e+06	1.29446e+06	1.53557
High	Master Protein	P34022	Ran-specific GTPase-activating protein OS=Mus musculus OX=10090 GN=Ranbp1 PE=1 SV=2	10	4	23.6	1.98533e+06	8.33189e+06	0.23828
High	Master Protein	A2ACM0	Regulatory-associated protein of mTOR OS=Mus musculus OX=10090 GN=Rptor PE=1 SV=1	7	11	149.4	1.98288e+06	4.54139e+06	0.436623
High	Master Protein	Q7TT37	Elongator complex protein 1 OS=Mus musculus OX=10090 GN=Elp1 PE=1 SV=2	4	8	149.5	1.9801e+06	5.53746e+06	0.357582
High	Master Protein	P52825	Carnitine O-palmitoyltransferase 2, mitochondrial OS=Mus musculus OX=10090 GN=Cpt2 PE=1 SV=2	10	5	73.9	1.96696e+06	4.27694e+06	0.459899
High	Master Protein	P33611	DNA polymerase alpha subunit B OS=Mus musculus OX=10090 GN=Pola2 PE=1 SV=2	14	9	66.2	1.95884e+06	7.48359e+06	0.261751
High	Master Protein	O89001	Carboxypeptidase D OS=Mus musculus OX=10090 GN=Cpd PE=1 SV=2	8	9	152.3	1.9529e+06	6.85264e+06	0.284984
High	Master Protein	P62141	Serine/threonine-protein phosphatase PP1-beta catalytic subunit OS=Mus musculus OX=10090 GN=Ppp1cb PE=1 SV=3	31	13	37.2	1.95206e+06	6.89029e+06	0.283306
High	Master Protein	Q80WQ2	Protein VAC14 homolog OS=Mus musculus OX=10090 GN=Vac14 PE=1 SV=1	10	9	88	1.94329e+06	4.10403e+06	0.473506
High	Master Protein	F8VQE9	Arf-GAP with GTPase, ANK repeat and PH domain-containing protein 3 OS=Mus musculus OX=10090 GN=Agap3 PE=1 SV=1	7	7	97.6	1.92271e+06	4.51961e+06	0.425416
High	Master Protein	A0A0X1KG62	Negative elongation factor B OS=Mus musculus OX=10090 GN=Nelfb PE=1 SV=1	11	9	70.3	1.92251e+06	5.75907e+06	0.333824
High	Master Protein	E9QMN5	Transcriptional repressor p66 alpha OS=Mus musculus OX=10090 GN=Gatad2a PE=1 SV=1	23	11	67.4	1.91781e+06	6.77335e+06	0.28314
High	Master Protein	A2A4P4	Predicted gene, 27029 OS=Mus musculus OX=10090 GN=Gm27029 PE=4 SV=1	21	8	60.5	1.91585e+06	9.92169e+06	0.193097
High	Master Protein	E9QAD8	IQ motif and SEC7 domain-containing protein 2 OS=Mus musculus OX=10090 GN=Iqsec2 PE=1 SV=1	1	3	162.7	1.91509e+06	3.40245e+07	0.0562857
High	Master Protein	E9PVX6	Proliferation marker protein Ki-67 OS=Mus musculus OX=10090 GN=Mki67 PE=1 SV=1	10	19	350.7	1.90592e+06	9.74035e+06	0.195673
High	Master Protein	A2AWN8	YTH domain family 1, isoform CRA_a OS=Mus musculus OX=10090 GN=Ythdf1 PE=1 SV=1	19	7	63.9	1.90313e+06	1.17178e+07	0.162413
High	Master Protein	A0A087WSP5	Signal transducer and activator of transcription OS=Mus musculus OX=10090 GN=Stat1 PE=1 SV=1	15	9	88	1.90086e+06	7.1526e+06	0.265757
High	Master Protein	Q8BIJ6	Isoleucine--tRNA ligase, mitochondrial OS=Mus musculus OX=10090 GN=Iars2 PE=1 SV=1	11	10	112.7	1.89868e+06	8.3445e+06	0.227536
High	Master Protein	P70335	Rho-associated protein kinase 1 OS=Mus musculus OX=10090 GN=Rock1 PE=1 SV=1	9	13	158.1	1.89609e+06	1.10553e+07	0.171509
High	Master Protein	A0A0R4J0J0	Palmdelphin OS=Mus musculus OX=10090 GN=Palmd PE=1 SV=1	23	10	62.6	1.89517e+06	1.16616e+07	0.162514
High	Master Protein	Q8C7K6	Prenylcysteine oxidase-like OS=Mus musculus OX=10090 GN=Pcyox1l PE=1 SV=1	11	6	54.8	1.89495e+06	3.75676e+06	0.50441
High	Master Protein	P97770	THUMP domain-containing protein 3 OS=Mus musculus OX=10090 GN=Thumpd3 PE=1 SV=1	19	7	56.4	1.89398e+06	5.82027e+06	0.325411
High	Master Protein	Q99LI7	Cleavage stimulation factor subunit 3 OS=Mus musculus OX=10090 GN=Cstf3 PE=1 SV=1	14	9	82.8	1.88856e+06	5.38635e+06	0.350619
High	Master Protein	Q569Z6	Thyroid hormone receptor-associated protein 3 OS=Mus musculus OX=10090 GN=Thrap3 PE=1 SV=1	14	15	108.1	1.88536e+06	1.44744e+07	0.130255
High	Master Protein	P14131	40S ribosomal protein S16 OS=Mus musculus OX=10090 GN=Rps16 PE=1 SV=4	27	5	16.4	1.8755e+06	8.85709e+06	0.211752
High	Master Protein	Q9WVE8	Protein kinase C and casein kinase substrate in neurons protein 2 OS=Mus musculus OX=10090 GN=Pacsin2 PE=1 SV=1	11	6	55.8	1.86833e+06	7.47376e+06	0.249985
High	Master Protein	Q8VCW8	Acyl-CoA synthetase family member 2, mitochondrial OS=Mus musculus OX=10090 GN=Acsf2 PE=1 SV=1	11	6	67.9	1.86778e+06	4.82745e+06	0.386909
High	Master Protein	Q9Z1Q5	Chloride intracellular channel protein 1 OS=Mus musculus OX=10090 GN=Clic1 PE=1 SV=3	22	4	27	1.86543e+06	6.57059e+06	0.283906
High	Master Protein	Q6EDY6	F-actin-uncapping protein LRRC16A OS=Mus musculus OX=10090 GN=Carmil1 PE=1 SV=2	9	13	151.8	1.85433e+06	6.75082e+06	0.274682
High	Master Protein	Q99PU8	Putative ATP-dependent RNA helicase DHX30 OS=Mus musculus OX=10090 GN=Dhx30 PE=1 SV=1	7	10	136.6	1.84879e+06	4.85026e+06	0.381174
High	Master Protein	P16332	Methylmalonyl-CoA mutase, mitochondrial OS=Mus musculus OX=10090 GN=Mut PE=1 SV=2	10	6	82.8	1.8483e+06	6.54062e+06	0.282588
High	Master Protein	Q9JJK2	LanC-like protein 2 OS=Mus musculus OX=10090 GN=Lancl2 PE=1 SV=1	24	7	50.7	1.84315e+06	6.28265e+06	0.293372
High	Master Protein	Q07417	Short-chain specific acyl-CoA dehydrogenase, mitochondrial OS=Mus musculus OX=10090 GN=Acads PE=1 SV=2	19	7	44.9	1.84263e+06	6.08256e+06	0.302937
High	Master Protein	Q3UZ39	Leucine-rich repeat flightless-interacting protein 1 OS=Mus musculus OX=10090 GN=Lrrfip1 PE=1 SV=2	32	14	79.2	1.8382e+06	1.18387e+07	0.155271
High	Master Protein	Q91V89	Serine/threonine-protein phosphatase 2A 56 kDa regulatory subunit OS=Mus musculus OX=10090 GN=Ppp2r5d PE=1 SV=1	23	11	69	1.83341e+06	7.61208e+06	0.240855
High	Master Protein	G3X928	SEC23-interacting protein OS=Mus musculus OX=10090 GN=Sec23ip PE=1 SV=1	6	5	110.7	1.83136e+06	5.39363e+06	0.339542
High	Master Protein	E9PWG6	Non-SMC condensin I complex, subunit G OS=Mus musculus OX=10090 GN=Ncapg PE=1 SV=1	13	12	112.8	1.83121e+06	5643538	0.324478
High	Master Protein	Q09143	High affinity cationic amino acid transporter 1 OS=Mus musculus OX=10090 GN=Slc7a1 PE=1 SV=1	10	6	67	1.83097e+06	5.05981e+06	0.361865
High	Master Protein	Q7TNV0	Protein DEK OS=Mus musculus OX=10090 GN=Dek PE=1 SV=1	21	10	43.1	1.8307e+06	1.18849e+07	0.154035
High	Master Protein	Q61701	ELAV-like protein 4 OS=Mus musculus OX=10090 GN=Elavl4 PE=1 SV=1	29	16	42.3	1.82471e+06	3.97068e+06	0.459545
High	Master Protein	P62264	40S ribosomal protein S14 OS=Mus musculus OX=10090 GN=Rps14 PE=1 SV=3	30	6	16.3	1.82391e+06	1.12211e+07	0.162543
High	Master Protein	O35604	NPC intracellular cholesterol transporter 1 OS=Mus musculus OX=10090 GN=Npc1 PE=1 SV=2	2	4	142.8	1.81549e+06	3.41136e+06	0.532191
High	Master Protein	A2A7F6	Chloride channel protein OS=Mus musculus OX=10090 GN=Clcn6 PE=1 SV=1	5	6	97.1	1.81402e+06	3.12838e+06	0.579858
High	Master Protein	Q8K1N4	Spermatogenesis-associated serine-rich protein 2 OS=Mus musculus OX=10090 GN=Spats2 PE=1 SV=1	30	11	58.9	1.8117e+06	6.86373e+06	0.263952
High	Master Protein	H3BK65	Epidermal growth factor receptor substrate 15 OS=Mus musculus OX=10090 GN=Eps15 PE=1 SV=1	8	9	102.2	1.81077e+06	5.77383e+06	0.313617
High	Master Protein	Q8JZR0	Long-chain-fatty-acid--CoA ligase 5 OS=Mus musculus OX=10090 GN=Acsl5 PE=1 SV=1	17	12	76.2	1.81008e+06	5.88043e+06	0.307815
High	Master Protein	Q99N57	RAF proto-oncogene serine/threonine-protein kinase OS=Mus musculus OX=10090 GN=Raf1 PE=1 SV=2	9	5	72.9	1.80636e+06	5.1502e+06	0.350736
High	Master Protein	B1ARD6	Schlafen 9 OS=Mus musculus OX=10090 GN=Slfn9 PE=1 SV=1	11	10	103.9	1.80611e+06	5.47991e+06	0.329586
High	Master Protein	Q3UI84	Replication factor C subunit 4 OS=Mus musculus OX=10090 GN=Rfc4 PE=1 SV=1	18	6	40.9	1801698	4.74365e+06	0.379813
High	Master Protein	Q922V4	Pleiotropic regulator 1 OS=Mus musculus OX=10090 GN=Plrg1 PE=1 SV=1	21	12	56.9	1.79416e+06	8288807	0.216456
High	Master Protein	D3Z7B5	RIKEN cDNA C330027C09 gene OS=Mus musculus OX=10090 GN=C330027C09Rik PE=1 SV=1	3	5	102.1	1.79207e+06	4.7506e+06	0.377231
High	Master Protein	E9Q5D6	Ran-binding protein 9 OS=Mus musculus OX=10090 GN=Ranbp9 PE=1 SV=1	5	4	75.7	1.78471e+06	3.56165e+06	0.50109
High	Master Protein	P84099	60S ribosomal protein L19 OS=Mus musculus OX=10090 GN=Rpl19 PE=1 SV=1	23	9	23.5	1.78052e+06	2.05315e+07	0.0867216
High	Master Protein	P46978	Dolichyl-diphosphooligosaccharide--protein glycosyltransferase subunit STT3A OS=Mus musculus OX=10090 GN=Stt3a PE=1 SV=1	6	8	80.5	1.779e+06	4.79427e+06	0.371068
High	Master Protein	Q91WD5	NADH dehydrogenase [ubiquinone] iron-sulfur protein 2, mitochondrial OS=Mus musculus OX=10090 GN=Ndufs2 PE=1 SV=1	14	7	52.6	1.77647e+06	6.43843e+06	0.275916
High	Master Protein	Q9CQV8	14-3-3 protein beta/alpha OS=Mus musculus OX=10090 GN=Ywhab PE=1 SV=3	44	29	28.1	1.77351e+06	8.67958e+06	0.204331
High	Master Protein	Q91YD9	Neural Wiskott-Aldrich syndrome protein OS=Mus musculus OX=10090 GN=Wasl PE=1 SV=1	10	5	54.2	1.77237e+06	5.6538e+06	0.313483
High	Master Protein	Q91Z53	Glyoxylate reductase/hydroxypyruvate reductase OS=Mus musculus OX=10090 GN=Grhpr PE=1 SV=1	15	6	35.3	1.77056e+06	4.53918e+06	0.390062
High	Master Protein	A0A1L1SV73	Ubiquitin carboxyl-terminal hydrolase 47 OS=Mus musculus OX=10090 GN=Usp47 PE=1 SV=1	10	12	157.1	1.75993e+06	4.84986e+06	0.362881
High	Master Protein	E9QM77	Ataxin-2 OS=Mus musculus OX=10090 GN=Atxn2 PE=1 SV=1	11	14	136.4	1.75956e+06	9.53746e+06	0.18449
High	Master Protein	O08914	Fatty-acid amide hydrolase 1 OS=Mus musculus OX=10090 GN=Faah PE=1 SV=1	9	4	63.2	1.75789e+06	4.42558e+06	0.397211
High	Master Protein	A2AEK1	AlphaCstF-64 variant 4 OS=Mus musculus OX=10090 GN=Cstf2 PE=1 SV=1	16	6	58.5	1.75563e+06	6.90461e+06	0.25427
High	Master Protein	E9PV41	Protein diaphanous homolog 1 OS=Mus musculus OX=10090 GN=Diaph1 PE=1 SV=1	7	10	140.3	1.74565e+06	4.67346e+06	0.373523
High	Master Protein	E9QK89	Mediator of DNA damage checkpoint protein 1 OS=Mus musculus OX=10090 GN=Mdc1 PE=1 SV=1	20	20	184.7	1.74162e+06	1.35863e+07	0.128189
High	Master Protein	Q8BVQ5	Protein phosphatase methylesterase 1 OS=Mus musculus OX=10090 GN=Ppme1 PE=1 SV=5	18	9	42.2	1.73961e+06	7.26686e+06	0.23939
High	Master Protein	Q9JJI8	60S ribosomal protein L38 OS=Mus musculus OX=10090 GN=Rpl38 PE=1 SV=3	50	6	8.2	1.73794e+06	8.75764e+06	0.198448
High	Master Protein	Q8BIL5	Protein Hook homolog 1 OS=Mus musculus OX=10090 GN=Hook1 PE=1 SV=2	16	12	84.4	1.73653e+06	8.863e+06	0.19593
High	Master Protein	Q9QXK7	Cleavage and polyadenylation specificity factor subunit 3 OS=Mus musculus OX=10090 GN=Cpsf3 PE=1 SV=2	6	7	77.5	1.73547e+06	3.53265e+06	0.491266
High	Master Protein	Q9R1T4	Septin-6 OS=Mus musculus OX=10090 GN=Sept6 PE=1 SV=4	25	10	49.6	1.7349e+06	1.15593e+07	0.150088
High	Master Protein	P23492	Purine nucleoside phosphorylase OS=Mus musculus OX=10090 GN=Pnp PE=1 SV=2	9	4	32.3	1.73467e+06	2.19643e+06	0.78977
High	Master Protein	P47857	ATP-dependent 6-phosphofructokinase, muscle type OS=Mus musculus OX=10090 GN=Pfkm PE=1 SV=3	16	17	85.2	1.73368e+06	4.97163e+06	0.348714
High	Master Protein	G3XA17	Eukaryotic translation initiation factor 4 gamma 2 OS=Mus musculus OX=10090 GN=Eif4g2 PE=1 SV=1	13	9	102	1.73252e+06	6.98824e+06	0.247919
High	Master Protein	Q60591	Nuclear factor of activated T-cells, cytoplasmic 2 OS=Mus musculus OX=10090 GN=Nfatc2 PE=1 SV=3	10	8	100	1.73129e+06	3.55201e+06	0.48741
High	Master Protein	Q9Z0V7	Mitochondrial import inner membrane translocase subunit Tim17-B OS=Mus musculus OX=10090 GN=Timm17b PE=1 SV=1	22	3	18.3	1.72621e+06	4635829	0.372363
High	Master Protein	Q9ESX5	H/ACA ribonucleoprotein complex subunit 4 OS=Mus musculus OX=10090 GN=Dkc1 PE=1 SV=4	14	7	57.4	1.72164e+06	6821263	0.252394
High	Master Protein	P62996	Transformer-2 protein homolog beta OS=Mus musculus OX=10090 GN=Tra2b PE=1 SV=1	11	4	33.6	1.7169e+06	4276323	0.401489
High	Master Protein	Q5SQX6	Cytoplasmic FMR1-interacting protein 2 OS=Mus musculus OX=10090 GN=Cyfip2 PE=1 SV=2	16	28	145.6	1.70645e+06	6.64438e+06	0.256826
High	Master Protein	P25976	Nucleolar transcription factor 1 OS=Mus musculus OX=10090 GN=Ubtf PE=1 SV=1	13	8	89.5	1.70624e+06	1.11239e+07	0.153385
High	Master Protein	A0A0R4J2B2	BTB/POZ domain-containing protein KCTD12 OS=Mus musculus OX=10090 GN=Kctd12 PE=1 SV=1	19	8	35.9	1.7025e+06	6.0071e+06	0.283415
High	Master Protein	P54754	Ephrin type-B receptor 3 OS=Mus musculus OX=10090 GN=Ephb3 PE=1 SV=2	8	6	109.6	1.6961e+06	4.25912e+06	0.398228
High	Master Protein	O09061	Proteasome subunit beta type-1 OS=Mus musculus OX=10090 GN=Psmb1 PE=1 SV=1	22	5	26.4	1.69242e+06	8.52806e+06	0.198453
High	Master Protein	Q4VA93	Protein kinase C OS=Mus musculus OX=10090 GN=Prkca PE=1 SV=1	12	6	76.8	1.69091e+06	6.56931e+06	0.257395
High	Master Protein	Q62523	Zyxin OS=Mus musculus OX=10090 GN=Zyx PE=1 SV=2	7	4	60.5	1.68877e+06	5.52796e+06	0.305497
High	Master Protein	Q923U0	TOM1-like protein 1 OS=Mus musculus OX=10090 GN=Tom1l1 PE=1 SV=1	11	7	52.7	1.68635e+06	4.81286e+06	0.350384
High	Master Protein	A0A140T8T4	Ribosomal protein L9, pseudogene 6 OS=Mus musculus OX=10090 GN=Rpl9-ps6 PE=4 SV=1	34	5	21.8	1.68138e+06	9.20424e+06	0.182675
High	Master Protein	Q9CR00	26S proteasome non-ATPase regulatory subunit 9 OS=Mus musculus OX=10090 GN=Psmd9 PE=1 SV=1	14	5	24.7	1.67992e+06	4.71373e+06	0.356388
High	Master Protein	Q8BT60	Copine-3 OS=Mus musculus OX=10090 GN=Cpne3 PE=1 SV=2	9	7	59.5	1.67716e+06	4.93265e+06	0.340012
High	Master Protein	Q80ZX0	Sec24-related gene family, member B (S. cerevisiae) OS=Mus musculus OX=10090 GN=Sec24b PE=1 SV=1	10	9	135.5	1.67614e+06	5.17921e+06	0.323629
High	Master Protein	Q9CR95	Adaptin ear-binding coat-associated protein 1 OS=Mus musculus OX=10090 GN=Necap1 PE=1 SV=2	39	10	29.6	1.67088e+06	7.72179e+06	0.216386
High	Master Protein	Q9Z257	P2X purinoceptor OS=Mus musculus OX=10090 GN=P2rx4 PE=1 SV=1	11	5	43.5	1.66818e+06	2.31495e+06	0.720613
High	Master Protein	P20108	Thioredoxin-dependent peroxide reductase, mitochondrial OS=Mus musculus OX=10090 GN=Prdx3 PE=1 SV=1	18	5	28.1	1.66615e+06	5.09878e+06	0.326775
High	Master Protein	Q6ZQI3	Malectin OS=Mus musculus OX=10090 GN=Mlec PE=1 SV=2	19	6	32.3	1.66596e+06	5.81366e+06	0.286559
High	Master Protein	P27046	Alpha-mannosidase 2 OS=Mus musculus OX=10090 GN=Man2a1 PE=1 SV=2	6	8	131.5	1.66365e+06	4.80297e+06	0.346379
High	Master Protein	Q9WTK2	Chromodomain Y-like protein OS=Mus musculus OX=10090 GN=Cdyl PE=1 SV=1	17	11	65.2	1.66283e+06	5.86874e+06	0.283337
High	Master Protein	Q3UMA3	Hepatocyte growth factor-regulated tyrosine kinase substrate OS=Mus musculus OX=10090 GN=Hgs PE=1 SV=1	12	8	86.1	1.64605e+06	6.07059e+06	0.271151
High	Master Protein	Q8R5C5	Beta-centractin OS=Mus musculus OX=10090 GN=Actr1b PE=1 SV=1	43	13	42.3	1.64571e+06	1.1133e+07	0.147822
High	Master Protein	Q6A058	Armadillo repeat-containing X-linked protein 2 OS=Mus musculus OX=10090 GN=Armcx2 PE=2 SV=2	12	8	81	1.64348e+06	3.45864e+06	0.47518
High	Master Protein	O35405	Phospholipase D3 OS=Mus musculus OX=10090 GN=Pld3 PE=1 SV=1	4	2	54.4	1.64226e+06	2.98303e+06	0.550535
High	Master Protein	Q8CFE6	Sodium-coupled neutral amino acid transporter 2 OS=Mus musculus OX=10090 GN=Slc38a2 PE=1 SV=1	9	3	55.5	1.63406e+06	7.33375e+06	0.222814
High	Master Protein	Q9D0L8	mRNA cap guanine-N7 methyltransferase OS=Mus musculus OX=10090 GN=Rnmt PE=1 SV=1	20	8	53.3	1.63247e+06	6.43861e+06	0.253544
High	Master Protein	Q8CIB5	Fermitin family homolog 2 OS=Mus musculus OX=10090 GN=Fermt2 PE=1 SV=1	17	9	77.8	1.62728e+06	4.68191e+06	0.347567
High	Master Protein	Q8N9S3	Activator of 90 kDa heat shock protein ATPase homolog 2 OS=Mus musculus OX=10090 GN=Ahsa2 PE=1 SV=2	6	2	37.6	1.62347e+06	485964	3.34071
High	Master Protein	Q62311	Transcription initiation factor TFIID subunit 6 OS=Mus musculus OX=10090 GN=Taf6 PE=1 SV=1	10	6	72.6	1.61895e+06	3.73218e+06	0.433781
High	Master Protein	Q8BRF7	Sec1 family domain-containing protein 1 OS=Mus musculus OX=10090 GN=Scfd1 PE=1 SV=1	10	8	72.3	1.61768e+06	4.78609e+06	0.337996
High	Master Protein	Q8JZN5	Acyl-CoA dehydrogenase family member 9, mitochondrial OS=Mus musculus OX=10090 GN=Acad9 PE=1 SV=2	11	8	68.7	1.6112e+06	6.06085e+06	0.265836
High	Master Protein	Q9DAR7	m7GpppX diphosphatase OS=Mus musculus OX=10090 GN=Dcps PE=1 SV=1	20	8	39	1.61085e+06	7.60348e+06	0.211857
High	Master Protein	A2AE89	Glutathione S-transferase Mu 1 OS=Mus musculus OX=10090 GN=Gstm1 PE=1 SV=2	21	5	28.5	1.60873e+06	7.81443e+06	0.205867
High	Master Protein	Q6PD03	Serine/threonine-protein phosphatase 2A 56 kDa regulatory subunit alpha isoform OS=Mus musculus OX=10090 GN=Ppp2r5a PE=1 SV=1	11	5	56.3	1.60512e+06	5.37657e+06	0.298539
High	Master Protein	Q8VBW6	NEDD8-activating enzyme E1 regulatory subunit OS=Mus musculus OX=10090 GN=Nae1 PE=1 SV=1	13	8	60.2	1.60191e+06	8.10772e+06	0.197578
High	Master Protein	P61202	COP9 signalosome complex subunit 2 OS=Mus musculus OX=10090 GN=Cops2 PE=1 SV=1	15	7	51.6	1.59697e+06	5.21363e+06	0.306307
High	Master Protein	P56959	RNA-binding protein FUS OS=Mus musculus OX=10090 GN=Fus PE=1 SV=1	13	8	52.6	1.59395e+06	1.15658e+07	0.137816
High	Master Protein	A0JNY3	Gephyrin OS=Mus musculus OX=10090 GN=Gphn PE=1 SV=1	5	4	83.6	1.59352e+06	5.67042e+06	0.281023
High	Master Protein	Q7M6Y3	Phosphatidylinositol-binding clathrin assembly protein OS=Mus musculus OX=10090 GN=Picalm PE=1 SV=1	13	8	71.5	1.5929e+06	5.4426e+06	0.292673
High	Master Protein	Q80TZ3	Putative tyrosine-protein phosphatase auxilin OS=Mus musculus OX=10090 GN=Dnajc6 PE=1 SV=2	5	5	102.2	1.59004e+06	4.89586e+06	0.324774
High	Master Protein	Q8K4R9	Disks large-associated protein 5 OS=Mus musculus OX=10090 GN=Dlgap5 PE=1 SV=2	7	4	90.1	1.58299e+06	1.58165e+06	1.00085
High	Master Protein	Q8C156	Condensin complex subunit 2 OS=Mus musculus OX=10090 GN=Ncaph PE=1 SV=1	14	7	82.3	1.58245e+06	5.00625e+06	0.316095
High	Master Protein	P43247	DNA mismatch repair protein Msh2 OS=Mus musculus OX=10090 GN=Msh2 PE=1 SV=1	15	12	104.1	1.58099e+06	4346110	0.363771
High	Master Protein	P97822	Acidic leucine-rich nuclear phosphoprotein 32 family member E OS=Mus musculus OX=10090 GN=Anp32e PE=1 SV=2	5	3	29.6	1.57618e+06	6.28874e+06	0.250635
High	Master Protein	G3X8R0	Receptor expression-enhancing protein OS=Mus musculus OX=10090 GN=Reep5 PE=1 SV=1	16	4	21.4	1.57413e+06	5.36457e+06	0.29343
High	Master Protein	Q8BHG3	Cell cycle control protein 50B OS=Mus musculus OX=10090 GN=Tmem30b PE=2 SV=1	6	2	39.2	1.56546e+06	1.26806e+06	1.23453
High	Master Protein	O08539	Myc box-dependent-interacting protein 1 OS=Mus musculus OX=10090 GN=Bin1 PE=1 SV=1	14	6	64.4	1.55093e+06	6.2222e+06	0.249258
High	Master Protein	P42208	Septin-2 OS=Mus musculus OX=10090 GN=Sept2 PE=1 SV=2	18	6	41.5	1.54941e+06	8.33273e+06	0.185943
High	Master Protein	Q60902	Epidermal growth factor receptor substrate 15-like 1 OS=Mus musculus OX=10090 GN=Eps15l1 PE=1 SV=3	18	12	99.2	1.5488e+06	7.84147e+06	0.197514
High	Master Protein	P54103	DnaJ homolog subfamily C member 2 OS=Mus musculus OX=10090 GN=Dnajc2 PE=1 SV=2	21	14	71.7	1.54625e+06	1.19407e+07	0.129493
High	Master Protein	O08709	Peroxiredoxin-6 OS=Mus musculus OX=10090 GN=Prdx6 PE=1 SV=3	24	6	24.9	1.54554e+06	12428561	0.124354
High	Master Protein	Q64364	Tumor suppressor ARF OS=Mus musculus OX=10090 GN=Cdkn2a PE=1 SV=1	17	4	19.2	1.53466e+06	1.26818e+06	1.21013
High	Master Protein	P47955	60S acidic ribosomal protein P1 OS=Mus musculus OX=10090 GN=Rplp1 PE=1 SV=1	52	3	11.5	1.53216e+06	5.9583e+06	0.257148
High	Master Protein	A0A0R4J083	Long-chain-specific acyl-CoA dehydrogenase, mitochondrial OS=Mus musculus OX=10090 GN=Acadl PE=1 SV=1	14	6	47.9	1.53049e+06	6.52892e+06	0.234417
High	Master Protein	Q61183	Poly(A) polymerase alpha OS=Mus musculus OX=10090 GN=Papola PE=1 SV=4	11	8	82.3	1.52961e+06	4.96417e+06	0.30813
High	Master Protein	Q3THE2	Myosin regulatory light chain 12B OS=Mus musculus OX=10090 GN=Myl12b PE=1 SV=2	40	8	19.8	1.52952e+06	4.57373e+06	0.334413
High	Master Protein	Q61216	Double-strand break repair protein MRE11 OS=Mus musculus OX=10090 GN=Mre11 PE=1 SV=1	7	5	80.2	1.52648e+06	4.38393e+06	0.348198
High	Master Protein	Q9DBR0	A-kinase anchor protein 8 OS=Mus musculus OX=10090 GN=Akap8 PE=1 SV=1	5	5	76.2	1.52373e+06	4.31522e+06	0.353106
High	Master Protein	Q6P8X1	Sorting nexin-6 OS=Mus musculus OX=10090 GN=Snx6 PE=1 SV=2	18	8	46.6	1.52007e+06	5.88791e+06	0.258168
High	Master Protein	Q9JKC8	AP-3 complex subunit mu-1 OS=Mus musculus OX=10090 GN=Ap3m1 PE=1 SV=1	11	3	46.9	1.51936e+06	5.77683e+06	0.26301
High	Master Protein	Q99LC5	Electron transfer flavoprotein subunit alpha, mitochondrial OS=Mus musculus OX=10090 GN=Etfa PE=1 SV=2	25	8	35	1.51637e+06	7.44459e+06	0.203687
High	Master Protein	F8VQD1	Protein polybromo-1 OS=Mus musculus OX=10090 GN=Pbrm1 PE=1 SV=1	5	10	194.6	1.51499e+06	4.86332e+06	0.311513
High	Master Protein	B9EKS2	Jumonji domain containing 1B OS=Mus musculus OX=10090 GN=Kdm3b PE=1 SV=1	8	10	191.3	1.50869e+06	5.77618e+06	0.261192
High	Master Protein	P10639	Thioredoxin OS=Mus musculus OX=10090 GN=Txn PE=1 SV=3	21	3	11.7	1.50352e+06	4690605	0.320538
High	Master Protein	P57716	Nicastrin OS=Mus musculus OX=10090 GN=Ncstn PE=1 SV=3	6	5	78.4	1.49737e+06	3.48774e+06	0.429324
High	Master Protein	Q62432	Mothers against decapentaplegic homolog 2 OS=Mus musculus OX=10090 GN=Smad2 PE=1 SV=2	10	5	52.2	1.4935e+06	1.67647e+06	0.89086
High	Master Protein	Q60596	DNA repair protein XRCC1 OS=Mus musculus OX=10090 GN=Xrcc1 PE=1 SV=2	18	9	68.9	1.49101e+06	8.99252e+06	0.165806
High	Master Protein	G3X8R8	MCG123888 OS=Mus musculus OX=10090 GN=Mkl2 PE=1 SV=1	12	10	118.5	1.4892e+06	7255429	0.205254
High	Master Protein	Q922W5	Pyrroline-5-carboxylate reductase 1, mitochondrial OS=Mus musculus OX=10090 GN=Pycr1 PE=1 SV=1	9	2	32.4	1.4884e+06	2.73128e+06	0.544947
High	Master Protein	Q3U9N4	Granulins OS=Mus musculus OX=10090 GN=Grn PE=1 SV=1	8	5	65	1.48798e+06	2.80433e+06	0.530602
High	Master Protein	E9QK48	Echinoderm microtubule-associated protein-like 2 OS=Mus musculus OX=10090 GN=Eml2 PE=1 SV=1	5	5	90.7	1.48498e+06	3.65423e+06	0.406373
High	Master Protein	Q8K1R3	Polyribonucleotide nucleotidyltransferase 1, mitochondrial OS=Mus musculus OX=10090 GN=Pnpt1 PE=1 SV=1	11	8	85.6	1.48306e+06	3.20711e+06	0.46243
High	Master Protein	P31750	RAC-alpha serine/threonine-protein kinase OS=Mus musculus OX=10090 GN=Akt1 PE=1 SV=2	7	5	55.7	1.47979e+06	1.24723e+06	1.18647
High	Master Protein	O70551	SRSF protein kinase 1 OS=Mus musculus OX=10090 GN=Srpk1 PE=1 SV=2	10	9	73	1.47618e+06	6325343	0.233376
High	Master Protein	Q91WN1	DnaJ homolog subfamily C member 9 OS=Mus musculus OX=10090 GN=Dnajc9 PE=1 SV=2	28	6	30	1.47242e+06	7.19746e+06	0.204575
High	Master Protein	Q62093	Serine/arginine-rich splicing factor 2 OS=Mus musculus OX=10090 GN=Srsf2 PE=1 SV=4	11	6	25.5	1.46979e+06	1.52104e+07	0.0966302
High	Master Protein	Q9JJA2	Conserved oligomeric Golgi complex subunit 8 OS=Mus musculus OX=10090 GN=Cog8 PE=1 SV=3	9	3	71.6	1.46945e+06	474504	3.09681
High	Master Protein	Q8BH43	Wiskott-Aldrich syndrome protein family member 2 OS=Mus musculus OX=10090 GN=Wasf2 PE=1 SV=1	11	5	54	1.46169e+06	4.66851e+06	0.313096
High	Master Protein	Q9CY58	Plasminogen activator inhibitor 1 RNA-binding protein OS=Mus musculus OX=10090 GN=Serbp1 PE=1 SV=2	24	10	44.7	1.45982e+06	1.34329e+07	0.108675
High	Master Protein	Q91VH2	Sorting nexin-9 OS=Mus musculus OX=10090 GN=Snx9 PE=1 SV=1	11	6	66.5	1.45579e+06	6.35991e+06	0.228901
High	Master Protein	Q791T5	Mitochondrial carrier homolog 1 OS=Mus musculus OX=10090 GN=Mtch1 PE=1 SV=1	11	4	41.5	1.45473e+06	2.63983e+06	0.551069
High	Master Protein	Q99J23	GH3 domain-containing protein OS=Mus musculus OX=10090 GN=Ghdc PE=2 SV=2	4	2	58.5	1.45292e+06		#VALUE!
High	Master Protein	D3YU22	LIM and calponin homology domains-containing protein 1 OS=Mus musculus OX=10090 GN=Limch1 PE=1 SV=1	15	14	119.5	1.45128e+06	7.88325e+06	0.184097
High	Master Protein	Q9CQF3	Cleavage and polyadenylation specificity factor subunit 5 OS=Mus musculus OX=10090 GN=Nudt21 PE=1 SV=1	30	8	26.2	1.44912e+06	8825651	0.164194
High	Master Protein	Q8BJS4	SUN domain-containing protein 2 OS=Mus musculus OX=10090 GN=Sun2 PE=1 SV=3	8	7	81.6	1.44591e+06	3.48835e+06	0.414497
High	Master Protein	O89051	Integral membrane protein 2B OS=Mus musculus OX=10090 GN=Itm2b PE=1 SV=1	18	4	30.2	1.44507e+06	4.37146e+06	0.33057
High	Master Protein	Q00547	Hyaluronan mediated motility receptor OS=Mus musculus OX=10090 GN=Hmmr PE=1 SV=4	14	5	91.7	1.44376e+06	5.09144e+06	0.283567
High	Master Protein	Q8VDP3	[F-actin]-monooxygenase MICAL1 OS=Mus musculus OX=10090 GN=Mical1 PE=1 SV=1	6	7	116.7	1.44012e+06	3.77307e+06	0.381683
High	Master Protein	Q9EQP2	EH domain-containing protein 4 OS=Mus musculus OX=10090 GN=Ehd4 PE=1 SV=1	9	6	61.4	1.43849e+06	4.25979e+06	0.33769
High	Master Protein	D3Z780	Translation initiation factor eIF-2B subunit delta OS=Mus musculus OX=10090 GN=Eif2b4 PE=1 SV=1	13	5	62.3	1.43659e+06	2.83851e+06	0.506108
High	Master Protein	O35654	DNA polymerase delta subunit 2 OS=Mus musculus OX=10090 GN=Pold2 PE=1 SV=2	21	8	51.3	1.43616e+06	4.76604e+06	0.301332
High	Master Protein	G3X9Q6	La-related protein 4 OS=Mus musculus OX=10090 GN=Larp4 PE=1 SV=1	8	5	79.7	1.43348e+06	3.28078e+06	0.436933
High	Master Protein	A0A0R4J0I8	Beta-secretase 2 OS=Mus musculus OX=10090 GN=Bace2 PE=1 SV=1	4	3	55.8	1.43133e+06	2.60388e+06	0.549692
High	Master Protein	Q9CZC8	Secernin-1 OS=Mus musculus OX=10090 GN=Scrn1 PE=1 SV=1	14	6	46.3	1.43037e+06	5.07642e+06	0.281768
High	Master Protein	Q8C0L0	Thioredoxin-related transmembrane protein 4 OS=Mus musculus OX=10090 GN=Tmx4 PE=1 SV=2	7	2	37.1	1.42928e+06	2933805	0.487176
High	Master Protein	Q99KD5	Protein unc-45 homolog A OS=Mus musculus OX=10090 GN=Unc45a PE=1 SV=2	5	8	103.4	1.4254e+06	3.24698e+06	0.438992
High	Master Protein	Q6P9P6	Kinesin-like protein KIF11 OS=Mus musculus OX=10090 GN=Kif11 PE=1 SV=1	6	5	118	1.42511e+06	2.78771e+06	0.511211
High	Master Protein	O88792	Junctional adhesion molecule A OS=Mus musculus OX=10090 GN=F11r PE=1 SV=2	14	4	32.4	1.42395e+06	5227865	0.272376
High	Master Protein	J3QPG5	Prosaposin OS=Mus musculus OX=10090 GN=Psap PE=1 SV=1	5	3	61.3	1.42307e+06	4.15633e+06	0.342385
High	Master Protein	Q9R1P4	Proteasome subunit alpha type-1 OS=Mus musculus OX=10090 GN=Psma1 PE=1 SV=1	16	4	29.5	1.42264e+06	3.47722e+06	0.409132
High	Master Protein	O70311	Glycylpeptide N-tetradecanoyltransferase 2 OS=Mus musculus OX=10090 GN=Nmt2 PE=1 SV=1	11	7	60.4	1.41725e+06	5.42194e+06	0.261393
High	Master Protein	Q9CX56	26S proteasome non-ATPase regulatory subunit 8 OS=Mus musculus OX=10090 GN=Psmd8 PE=1 SV=2	16	5	39.9	1.4172e+06	4.7228e+06	0.300076
High	Master Protein	O54825	Bystin OS=Mus musculus OX=10090 GN=Bysl PE=1 SV=3	13	7	49.8	1.41607e+06	3.5648e+06	0.397238
High	Master Protein	P62317	Small nuclear ribonucleoprotein Sm D2 OS=Mus musculus OX=10090 GN=Snrpd2 PE=1 SV=1	16	2	13.5	1.41544e+06	4.34455e+06	0.325796
High	Master Protein	Q9R1P1	Proteasome subunit beta type-3 OS=Mus musculus OX=10090 GN=Psmb3 PE=1 SV=1	27	6	22.9	1.40216e+06	3.86173e+06	0.363091
High	Master Protein	Q80U72	Protein scribble homolog OS=Mus musculus OX=10090 GN=Scrib PE=1 SV=2	8	12	174	1.4008e+06	5.19609e+06	0.269588
High	Master Protein	P83887	Tubulin gamma-1 chain OS=Mus musculus OX=10090 GN=Tubg1 PE=1 SV=1	32	9	51.1	1.39997e+06	7.01729e+06	0.199503
High	Master Protein	Q9D710	Thioredoxin-related transmembrane protein 2 OS=Mus musculus OX=10090 GN=Tmx2 PE=1 SV=1	12	4	33.9	1.39808e+06	671071	2.08336
High	Master Protein	Q9DBY8	Nuclear valosin-containing protein-like OS=Mus musculus OX=10090 GN=Nvl PE=1 SV=1	14	9	94.4	1.39681e+06	3.61142e+06	0.386777
High	Master Protein	P43274	Histone H1.4 OS=Mus musculus OX=10090 GN=Hist1h1e PE=1 SV=2	25	12	22	1.39122e+06	7.42207e+06	0.187444
High	Master Protein	Q3UGY8	Brefeldin A-inhibited guanine nucleotide-exchange protein 3 OS=Mus musculus OX=10090 GN=Arfgef3 PE=1 SV=1	4	7	239.9	1.38714e+06	2.01738e+06	0.687595
High	Master Protein	Q91VE0	Long-chain fatty acid transport protein 4 OS=Mus musculus OX=10090 GN=Slc27a4 PE=1 SV=1	14	7	72.3	1.38677e+06	3.35956e+06	0.412783
High	Master Protein	Q9JIK9	28S ribosomal protein S34, mitochondrial OS=Mus musculus OX=10090 GN=Mrps34 PE=1 SV=1	11	4	25.8	1385634	4.58297e+06	0.302344
High	Master Protein	Q8BLN5	Lanosterol synthase OS=Mus musculus OX=10090 GN=Lss PE=1 SV=2	7	5	83.1	1.37898e+06	3.04528e+06	0.452826
High	Master Protein	B1ATI0	Aldehyde dehydrogenase OS=Mus musculus OX=10090 GN=Aldh3a2 PE=1 SV=1	9	6	59.2	1.37702e+06	6.06439e+06	0.227067
High	Master Protein	Q64133	Amine oxidase [flavin-containing] A OS=Mus musculus OX=10090 GN=Maoa PE=1 SV=3	7	5	59.6	1.37271e+06	3.9939e+06	0.343702
High	Master Protein	Q80VC9	Calmodulin-regulated spectrin-associated protein 3 OS=Mus musculus OX=10090 GN=Camsap3 PE=1 SV=1	14	13	135.1	1.37141e+06	8.88316e+06	0.154383
High	Master Protein	Q8VD04	GRIP1-associated protein 1 OS=Mus musculus OX=10090 GN=Gripap1 PE=1 SV=1	18	12	92.7	1.36734e+06	5.79874e+06	0.235799
High	Master Protein	G5E870	E3 ubiquitin-protein ligase TRIP12 OS=Mus musculus OX=10090 GN=Trip12 PE=1 SV=1	10	15	224	1.36674e+06	4.85694e+06	0.281399
High	Master Protein	Q9Z2V5	Histone deacetylase 6 OS=Mus musculus OX=10090 GN=Hdac6 PE=1 SV=3	4	5	125.7	1.36607e+06	1575783	0.866918
High	Master Protein	P63028	Translationally-controlled tumor protein OS=Mus musculus OX=10090 GN=Tpt1 PE=1 SV=1	48	4	19.5	1.36534e+06	7.06942e+06	0.193134
High	Master Protein	P07356	Annexin A2 OS=Mus musculus OX=10090 GN=Anxa2 PE=1 SV=2	15	6	38.7	1.36223e+06	2.04418e+06	0.666398
High	Master Protein	G3X963	ATPase family AAA domain-containing protein 2 OS=Mus musculus OX=10090 GN=Atad2 PE=1 SV=1	7	7	155.2	1.35566e+06	3.72691e+06	0.36375
High	Master Protein	Q8BP67	60S ribosomal protein L24 OS=Mus musculus OX=10090 GN=Rpl24 PE=1 SV=2	19	5	17.8	1.35125e+06	1.96364e+07	0.0688137
High	Master Protein	P18872	Guanine nucleotide-binding protein G(o) subunit alpha OS=Mus musculus OX=10090 GN=Gnao1 PE=1 SV=3	15	6	40.1	1.34938e+06	3.3832e+06	0.398849
High	Master Protein	P31938	Dual specificity mitogen-activated protein kinase kinase 1 OS=Mus musculus OX=10090 GN=Map2k1 PE=1 SV=2	10	4	43.4	1.3491e+06	6.45898e+06	0.208873
High	Master Protein	E9Q6E5	Serine/arginine-rich-splicing factor 11 OS=Mus musculus OX=10090 GN=Srsf11 PE=1 SV=1	14	8	56.7	1.34126e+06	8.15769e+06	0.164417
High	Master Protein	Q99LC3	NADH dehydrogenase [ubiquinone] 1 alpha subcomplex subunit 10, mitochondrial OS=Mus musculus OX=10090 GN=Ndufa10 PE=1 SV=1	19	4	40.6	1.34112e+06	3.5071e+06	0.3824
High	Master Protein	E9Q9H0	Disks large homolog 1 OS=Mus musculus OX=10090 GN=Dlg1 PE=1 SV=1	7	6	100.8	1.34016e+06	4.68117e+06	0.286288
High	Master Protein	Q8BIJ7	RUN and FYVE domain-containing protein 1 OS=Mus musculus OX=10090 GN=Rufy1 PE=1 SV=1	8	5	80.3	1.33921e+06	4.05372e+06	0.330367
High	Master Protein	Q9Z0U1	Tight junction protein ZO-2 OS=Mus musculus OX=10090 GN=Tjp2 PE=1 SV=2	9	9	131.2	1.33759e+06	7.24191e+06	0.184701
High	Master Protein	Q80T23	Synaptotagmin-like protein 5 OS=Mus musculus OX=10090 GN=Sytl5 PE=1 SV=1	16	9	84	1.33362e+06	4.87237e+06	0.273712
High	Master Protein	A0A0R4J0T5	CUG triplet repeat, RNA binding protein 1, isoform CRA_b OS=Mus musculus OX=10090 GN=Celf1 PE=1 SV=1	4	2	52.1	1.33304e+06	1.21536e+06	1.09683
High	Master Protein	Q91YP2	Neurolysin, mitochondrial OS=Mus musculus OX=10090 GN=Nln PE=1 SV=1	5	3	80.4	1.3313e+06	2.85022e+06	0.467087
High	Master Protein	Q91YH5	Atlastin-3 OS=Mus musculus OX=10090 GN=Atl3 PE=1 SV=1	14	7	60.5	1.3288e+06	4.58064e+06	0.290091
High	Master Protein	Q60953	Protein PML OS=Mus musculus OX=10090 GN=Pml PE=1 SV=3	8	7	98.2	1.32615e+06	3.57206e+06	0.371258
High	Master Protein	Q3UI33	Methionine aminopeptidase 2 OS=Mus musculus OX=10090 GN=Metap2 PE=1 SV=1	13	5	54.1	1.32282e+06	4156568	0.318249
High	Master Protein	A0A171EBK8	Rap1 GTPase-activating protein 2 OS=Mus musculus OX=10090 GN=Rap1gap2 PE=1 SV=1	5	5	84.3	1.32103e+06	3.42656e+06	0.385525
High	Master Protein	Q05CL8	La-related protein 7 OS=Mus musculus OX=10090 GN=Larp7 PE=1 SV=2	15	8	64.8	1.30934e+06	5.36454e+06	0.244073
High	Master Protein	O55106	Striatin OS=Mus musculus OX=10090 GN=Strn PE=1 SV=2	7	4	85.9	1.30784e+06	3.73733e+06	0.34994
High	Master Protein	Q7TNC4	Putative RNA-binding protein Luc7-like 2 OS=Mus musculus OX=10090 GN=Luc7l2 PE=1 SV=1	17	9	46.6	1.3051e+06	6.80881e+06	0.191678
High	Master Protein	Q9WVM3	Anaphase-promoting complex subunit 7 OS=Mus musculus OX=10090 GN=Anapc7 PE=1 SV=3	10	3	63	1.30284e+06	906351	1.43745
High	Master Protein	Q62383	Transcription elongation factor SPT6 OS=Mus musculus OX=10090 GN=Supt6h PE=1 SV=2	14	17	199	1.30281e+06	8.13453e+06	0.160158
High	Master Protein	Q8C7X2	ER membrane protein complex subunit 1 OS=Mus musculus OX=10090 GN=Emc1 PE=1 SV=1	7	7	111.5	1.29702e+06	3.56106e+06	0.364224
High	Master Protein	Q80VL1	Tudor and KH domain-containing protein OS=Mus musculus OX=10090 GN=Tdrkh PE=1 SV=1	8	5	62.1	1.29534e+06	1.75502e+06	0.738074
High	Master Protein	P62874	Guanine nucleotide-binding protein G(I)/G(S)/G(T) subunit beta-1 OS=Mus musculus OX=10090 GN=Gnb1 PE=1 SV=3	13	7	37.4	1.28943e+06	1.59424e+06	0.808806
High	Master Protein	Q99JI4	26S proteasome non-ATPase regulatory subunit 6 OS=Mus musculus OX=10090 GN=Psmd6 PE=1 SV=1	15	8	45.5	1.28321e+06	1.10455e+07	0.116175
High	Master Protein	Q9Z1B7	Mitogen-activated protein kinase 13 OS=Mus musculus OX=10090 GN=Mapk13 PE=1 SV=2	8	3	42	1.28008e+06	2.9121e+06	0.439575
High	Master Protein	Q4PZA2	Endothelin-converting enzyme 1 OS=Mus musculus OX=10090 GN=Ece1 PE=1 SV=1	4	4	87	1.27946e+06	1.96157e+06	0.652265
High	Master Protein	Q80UW2	F-box only protein 2 OS=Mus musculus OX=10090 GN=Fbxo2 PE=1 SV=1	4	3	33.7	1.26612e+06	3.08122e+06	0.410915
High	Master Protein	Q8CH18	Cell division cycle and apoptosis regulator protein 1 OS=Mus musculus OX=10090 GN=Ccar1 PE=1 SV=1	5	8	132	1.26345e+06	5.33124e+06	0.236991
High	Master Protein	P41731	CD63 antigen OS=Mus musculus OX=10090 GN=Cd63 PE=1 SV=2	9	3	25.7	1.25936e+06	2.15304e+06	0.584921
High	Master Protein	A0A1W2P7A1	40S ribosomal protein S12 OS=Mus musculus OX=10090 GN=Rps12 PE=1 SV=1	16	3	16	1.25383e+06	5.5833e+06	0.224567
High	Master Protein	Q8BM55	Transmembrane protein 214 OS=Mus musculus OX=10090 GN=Tmem214 PE=1 SV=1	5	4	76.4	1.25084e+06	1.2667e+06	0.98748
High	Master Protein	Q62348	Translin OS=Mus musculus OX=10090 GN=Tsn PE=1 SV=1	16	4	26.2	1.25024e+06	3.45041e+06	0.362346
High	Master Protein	Q9JKY5	Huntingtin-interacting protein 1-related protein OS=Mus musculus OX=10090 GN=Hip1r PE=1 SV=2	7	7	119.4	1.24567e+06	4.00105e+06	0.311336
High	Master Protein	Q8BWD8	Cyclin-dependent kinase 19 OS=Mus musculus OX=10090 GN=Cdk19 PE=2 SV=1	6	3	56.5	1.24249e+06	3.41839e+06	0.363474
High	Master Protein	Q9Z1Z2	Serine-threonine kinase receptor-associated protein OS=Mus musculus OX=10090 GN=Strap PE=1 SV=2	25	9	38.4	1.24079e+06	4.75907e+06	0.260722
High	Master Protein	Q8CHT0	Delta-1-pyrroline-5-carboxylate dehydrogenase, mitochondrial OS=Mus musculus OX=10090 GN=Aldh4a1 PE=1 SV=3	10	4	61.8	1.24068e+06	5.69878e+06	0.217709
High	Master Protein	Q61655	ATP-dependent RNA helicase DDX19A OS=Mus musculus OX=10090 GN=Ddx19a PE=1 SV=2	9	6	53.9	1.23752e+06	3.86626e+06	0.320082
High	Master Protein	Q9D071	MMS19 nucleotide excision repair protein homolog OS=Mus musculus OX=10090 GN=Mms19 PE=1 SV=1	3	5	113	1.23671e+06	2.21964e+06	0.557167
High	Master Protein	Q99K70	Ras-related GTP-binding protein C OS=Mus musculus OX=10090 GN=Rragc PE=1 SV=1	18	6	44.1	1.23558e+06	4.13479e+06	0.298825
High	Master Protein	Q8R1Q8	Cytoplasmic dynein 1 light intermediate chain 1 OS=Mus musculus OX=10090 GN=Dync1li1 PE=1 SV=1	20	9	56.6	1.23385e+06	5.69468e+06	0.216667
High	Master Protein	Q9CRY7	Lysophospholipase D GDPD1 OS=Mus musculus OX=10090 GN=Gdpd1 PE=1 SV=1	7	3	35.8	1.23228e+06	1.88603e+06	0.653368
High	Master Protein	Q8C788	Sorting nexin OS=Mus musculus OX=10090 GN=Snx18 PE=1 SV=1	11	6	67.7	1.22721e+06	5.43738e+06	0.2257
High	Master Protein	Q80TL7	Protein MON2 homolog OS=Mus musculus OX=10090 GN=Mon2 PE=1 SV=2	4	7	189	1.22569e+06	2644185	0.463541
High	Master Protein	Q61425	Hydroxyacyl-coenzyme A dehydrogenase, mitochondrial OS=Mus musculus OX=10090 GN=Hadh PE=1 SV=2	9	3	34.4	1.22337e+06	4.28189e+06	0.285707
High	Master Protein	P70268	Serine/threonine-protein kinase N1 OS=Mus musculus OX=10090 GN=Pkn1 PE=1 SV=3	8	7	104.3	1.22035e+06	3.95212e+06	0.308784
High	Master Protein	P47941	Crk-like protein OS=Mus musculus OX=10090 GN=Crkl PE=1 SV=2	24	6	33.8	1.21972e+06	3.77812e+06	0.322837
High	Master Protein	O70435	Proteasome subunit alpha type-3 OS=Mus musculus OX=10090 GN=Psma3 PE=1 SV=3	5	2	28.4	1.21955e+06	2.00069e+06	0.609562
High	Master Protein	Q8C3F2	Constitutive coactivator of PPAR-gamma-like protein 2 OS=Mus musculus OX=10090 GN=Fam120c PE=1 SV=3	8	6	119.6	1.21657e+06	3.60429e+06	0.337534
High	Master Protein	Q9Z0W3	Nuclear pore complex protein Nup160 OS=Mus musculus OX=10090 GN=Nup160 PE=1 SV=2	4	5	158.1	1.21064e+06	2.91019e+06	0.415999
High	Master Protein	A0A0R4J0E4	Integrator complex subunit 7 OS=Mus musculus OX=10090 GN=Ints7 PE=1 SV=1	3	3	106.8	1.21015e+06	2.15822e+06	0.560718
High	Master Protein	Q8BH95	Enoyl-CoA hydratase, mitochondrial OS=Mus musculus OX=10090 GN=Echs1 PE=1 SV=1	15	4	31.5	1.20892e+06	3.80897e+06	0.317389
High	Master Protein	Q9CQM8	60S ribosomal protein L21 OS=Mus musculus OX=10090 GN=Rpl21 PE=1 SV=1	21	4	18.6	1.20761e+06	1.5415e+07	0.0783398
High	Master Protein	E9PYL9	Predicted gene 10036 OS=Mus musculus OX=10090 GN=Gm10036 PE=3 SV=1	13	2	20.3	1.20611e+06	4354581	0.276976
High	Master Protein	Q6ZWZ4	60S ribosomal protein L36 OS=Mus musculus OX=10090 GN=Rpl36 PE=1 SV=1	30	5	12.2	1.19894e+06	1.44658e+07	0.0828814
High	Master Protein	Q7TSY6	CUGBP Elav-like family member 4 OS=Mus musculus OX=10090 GN=Celf4 PE=1 SV=2	9	8	51.9	1.19362e+06	5.44571e+06	0.219185
High	Master Protein	Q9D1D4	Transmembrane emp24 domain-containing protein 10 OS=Mus musculus OX=10090 GN=Tmed10 PE=1 SV=1	15	6	24.9	1.19202e+06	3.72315e+06	0.320163
High	Master Protein	Q99PG2	Opioid growth factor receptor OS=Mus musculus OX=10090 GN=Ogfr PE=1 SV=1	20	7	70.6	1.19195e+06	3.08524e+06	0.38634
High	Master Protein	Q8VC30	Triokinase/FMN cyclase OS=Mus musculus OX=10090 GN=Tkfc PE=1 SV=1	13	5	59.7	1.19095e+06	2.66111e+06	0.447537
High	Master Protein	Q8C052	Microtubule-associated protein 1S OS=Mus musculus OX=10090 GN=Map1s PE=1 SV=2	6	5	102.9	1.18609e+06	2.54535e+06	0.465981
High	Master Protein	Q9D1A2	Cytosolic non-specific dipeptidase OS=Mus musculus OX=10090 GN=Cndp2 PE=1 SV=1	16	5	52.7	1.18375e+06	5.66284e+06	0.209039
High	Master Protein	Q80VD1	Protein FAM98B OS=Mus musculus OX=10090 GN=Fam98b PE=1 SV=1	8	4	45.3	1.18278e+06	3.62327e+06	0.32644
High	Master Protein	Q9QYC0	Alpha-adducin OS=Mus musculus OX=10090 GN=Add1 PE=1 SV=2	9	5	80.6	1.17727e+06	4.29272e+06	0.274248
High	Master Protein	B2RY56	RNA-binding protein 25 OS=Mus musculus OX=10090 GN=Rbm25 PE=1 SV=2	12	8	99.5	1.17583e+06	1.03788e+07	0.113291
High	Master Protein	Q3UCQ1	Forkhead box protein K2 OS=Mus musculus OX=10090 GN=Foxk2 PE=1 SV=3	7	4	68.4	1.17343e+06	4.26634e+06	0.275043
High	Master Protein	Q9D1M0	Protein SEC13 homolog OS=Mus musculus OX=10090 GN=Sec13 PE=1 SV=3	11	3	35.5	1.17319e+06	2.04216e+06	0.574485
High	Master Protein	A2A8R7	Terminal uridylyltransferase 4 OS=Mus musculus OX=10090 GN=Zcchc11 PE=1 SV=1	5	7	185	1.17168e+06	3.24712e+06	0.360835
High	Master Protein	Q9DC61	Mitochondrial-processing peptidase subunit alpha OS=Mus musculus OX=10090 GN=Pmpca PE=1 SV=1	7	4	58.2	1.17044e+06	1.97797e+06	0.591736
High	Master Protein	Q8C0D5	Elongation factor-like GTPase 1 OS=Mus musculus OX=10090 GN=Efl1 PE=1 SV=1	11	7	125.7	1.16881e+06	4.93584e+06	0.236801
High	Master Protein	Q91X20	Set1/Ash2 histone methyltransferase complex subunit ASH2 OS=Mus musculus OX=10090 GN=Ash2l PE=1 SV=1	14	7	68.2	1.16774e+06	7.77439e+06	0.150204
High	Master Protein	P32067	Lupus La protein homolog OS=Mus musculus OX=10090 GN=Ssb PE=1 SV=1	22	11	47.7	1.16638e+06	1.23292e+07	0.0946028
High	Master Protein	Q80X81	Acetyl-Coenzyme A acetyltransferase 3 OS=Mus musculus OX=10090 GN=Acat3 PE=1 SV=1	25	7	41.4	1.16521e+06	5420550	0.214962
High	Master Protein	Q61187	Tumor susceptibility gene 101 protein OS=Mus musculus OX=10090 GN=Tsg101 PE=1 SV=2	13	6	44.1	1.16137e+06	2.84325e+06	0.408467
High	Master Protein	Q6PAM1	Alpha-taxilin OS=Mus musculus OX=10090 GN=Txlna PE=1 SV=1	17	10	62.3	1.16029e+06	3.90089e+06	0.297443
High	Master Protein	Q9JI11	Serine/threonine-protein kinase 4 OS=Mus musculus OX=10090 GN=Stk4 PE=1 SV=1	11	5	55.5	1.15622e+06	2.02039e+06	0.572277
High	Master Protein	Q8CFQ3	RNA helicase aquarius OS=Mus musculus OX=10090 GN=Aqr PE=1 SV=2	4	6	170.2	1.15518e+06	2.31224e+06	0.499594
High	Master Protein	Q8CCF0	U4/U6 small nuclear ribonucleoprotein Prp31 OS=Mus musculus OX=10090 GN=Prpf31 PE=1 SV=3	12	9	55.4	1.15454e+06	4.26408e+06	0.270759
High	Master Protein	Q9DBG6	Dolichyl-diphosphooligosaccharide--protein glycosyltransferase subunit 2 OS=Mus musculus OX=10090 GN=Rpn2 PE=1 SV=1	8	5	69	1.15115e+06	4.03008e+06	0.285638
High	Master Protein	Q9DCU6	39S ribosomal protein L4, mitochondrial OS=Mus musculus OX=10090 GN=Mrpl4 PE=1 SV=1	18	5	33.1	1.14924e+06	3.47519e+06	0.330698
High	Master Protein	Q3TDN2	FAS-associated factor 2 OS=Mus musculus OX=10090 GN=Faf2 PE=1 SV=2	20	5	52.4	1.14534e+06	6.28228e+06	0.182313
High	Master Protein	Q91WU5	Arsenite methyltransferase OS=Mus musculus OX=10090 GN=As3mt PE=1 SV=2	17	6	41.8	1.14383e+06	2.88224e+06	0.396856
High	Master Protein	Q5SFM8	RNA-binding protein 27 OS=Mus musculus OX=10090 GN=Rbm27 PE=1 SV=3	11	6	118.5	1.13353e+06	3.93335e+06	0.288184
High	Master Protein	P20060	Beta-hexosaminidase subunit beta OS=Mus musculus OX=10090 GN=Hexb PE=1 SV=2	17	7	61.1	1.12597e+06	1.05595e+07	0.106631
High	Master Protein	Q8R570	Synaptosomal-associated protein 47 OS=Mus musculus OX=10090 GN=Snap47 PE=1 SV=1	19	10	46.5	1.1238e+06	6.2384e+06	0.180143
High	Master Protein	F8WHU5	Sister chromatid cohesion protein PDS5 homolog B OS=Mus musculus OX=10090 GN=Pds5b PE=1 SV=1	8	11	164.7	1.12329e+06	6.61867e+06	0.169715
High	Master Protein	P17879	Heat shock 70 kDa protein 1B OS=Mus musculus OX=10090 GN=Hspa1b PE=1 SV=3	15	33	70.1	1.12289e+06		#VALUE!
High	Master Protein	Q8C7R4	Ubiquitin-like modifier-activating enzyme 6 OS=Mus musculus OX=10090 GN=Uba6 PE=1 SV=1	16	14	117.9	1.11968e+06	6.20361e+06	0.180488
High	Master Protein	E9PUF7	Rho guanine nucleotide exchange factor 1 OS=Mus musculus OX=10090 GN=Arhgef1 PE=1 SV=1	8	5	108.6	1.11555e+06	3.26389e+06	0.341785
High	Master Protein	Q8R3C6	Probable RNA-binding protein 19 OS=Mus musculus OX=10090 GN=Rbm19 PE=1 SV=1	15	12	106	1.11457e+06	5.25582e+06	0.212065
High	Master Protein	O89053	Coronin-1A OS=Mus musculus OX=10090 GN=Coro1a PE=1 SV=5	14	5	51	1.11409e+06	4.63549e+06	0.240339
High	Master Protein	A0A2I3BRT4	Epiplakin OS=Mus musculus OX=10090 PE=4 SV=1	10	9	381.5	1.11397e+06	3.19109e+06	0.349086
High	Master Protein	Q9WTP7	GTP:AMP phosphotransferase AK3, mitochondrial OS=Mus musculus OX=10090 GN=Ak3 PE=1 SV=3	23	4	25.4	1.11395e+06	4.19794e+06	0.265356
High	Master Protein	Q8BGT1	Leucine-rich repeat transmembrane protein FLRT3 OS=Mus musculus OX=10090 GN=Flrt3 PE=1 SV=1	5	4	72.8	1.11077e+06	2.31651e+06	0.479499
High	Master Protein	P28651	Carbonic anhydrase-related protein OS=Mus musculus OX=10090 GN=Ca8 PE=1 SV=5	26	6	33.1	1.11007e+06	3.15627e+06	0.351702
High	Master Protein	Q61543	Golgi apparatus protein 1 OS=Mus musculus OX=10090 GN=Glg1 PE=1 SV=1	6	10	133.6	1.10686e+06	3.37919e+06	0.327553
High	Master Protein	Q8BVE8	Histone-lysine N-methyltransferase NSD2 OS=Mus musculus OX=10090 GN=Nsd2 PE=1 SV=2	8	7	152.2	1.10535e+06	3.21389e+06	0.34393
High	Master Protein	A2AI52	Ubiquitin carboxyl-terminal hydrolase 8 OS=Mus musculus OX=10090 GN=Usp8 PE=1 SV=1	9	7	123.8	1.10189e+06	5.27206e+06	0.209005
High	Master Protein	O88935	Synapsin-1 OS=Mus musculus OX=10090 GN=Syn1 PE=1 SV=2	10	3	74.1	1.10125e+06	2.03822e+06	0.540297
High	Master Protein	B2RXC1	Trafficking protein particle complex subunit 11 OS=Mus musculus OX=10090 GN=Trappc11 PE=1 SV=1	3	5	128.3	1.09513e+06	3.07295e+06	0.356376
High	Master Protein	A0A2I3BQP6	Calcium/calmodulin-dependent protein kinase type II subunit gamma OS=Mus musculus OX=10090 GN=Camk2g PE=1 SV=1	11	6	63.2	1.0932e+06	4.71004e+06	0.232099
High	Master Protein	Q8CGF7	Transcription elongation regulator 1 OS=Mus musculus OX=10090 GN=Tcerg1 PE=1 SV=2	3	3	123.7	1.09026e+06	2.51808e+06	0.432974
High	Master Protein	Q8K1R7	Serine/threonine-protein kinase Nek9 OS=Mus musculus OX=10090 GN=Nek9 PE=1 SV=2	7	7	107.1	1.08778e+06	2.53549e+06	0.429024
High	Master Protein	Q3UZG4	Aminoacyl tRNA synthase complex-interacting multifunctional protein 1 OS=Mus musculus OX=10090 GN=Aimp1 PE=1 SV=1	28	6	35.1	1.08681e+06	6.56968e+06	0.165428
High	Master Protein	P32020	Non-specific lipid-transfer protein OS=Mus musculus OX=10090 GN=Scp2 PE=1 SV=3	5	5	59.1	1.08362e+06	3.70047e+06	0.292834
High	Master Protein	P43276	Histone H1.5 OS=Mus musculus OX=10090 GN=Hist1h1b PE=1 SV=2	15	7	22.6	1.07873e+06	10742346	0.100418
High	Master Protein	Q9CWK8	Sorting nexin-2 OS=Mus musculus OX=10090 GN=Snx2 PE=1 SV=2	14	7	58.4	1.07804e+06	4.30264e+06	0.250554
High	Master Protein	Q9CQR4	Acyl-coenzyme A thioesterase 13 OS=Mus musculus OX=10090 GN=Acot13 PE=1 SV=1	25	3	15.2	1.07729e+06	3.93246e+06	0.27395
High	Master Protein	Q80UP5	Ankyrin repeat domain-containing protein 13A OS=Mus musculus OX=10090 GN=Ankrd13a PE=1 SV=2	6	4	67.1	1.07351e+06	2.69135e+06	0.398873
High	Master Protein	Q99KC8	von Willebrand factor A domain-containing protein 5A OS=Mus musculus OX=10090 GN=Vwa5a PE=1 SV=2	8	7	87.1	1.07183e+06	1.31283e+06	0.816432
High	Master Protein	Q99MN9	Propionyl-CoA carboxylase beta chain, mitochondrial OS=Mus musculus OX=10090 GN=Pccb PE=1 SV=2	12	5	58.4	1.06936e+06	3.95958e+06	0.27007
High	Master Protein	Q9DBR1	5'-3' exoribonuclease 2 OS=Mus musculus OX=10090 GN=Xrn2 PE=1 SV=1	10	8	108.6	1.06393e+06	4.17501e+06	0.254833
High	Master Protein	Q8K2M0	39S ribosomal protein L38, mitochondrial OS=Mus musculus OX=10090 GN=Mrpl38 PE=1 SV=2	19	7	45	1.06289e+06	6.96503e+06	0.152604
High	Master Protein	Q8BH15	CCR4-NOT transcription complex subunit 10 OS=Mus musculus OX=10090 GN=Cnot10 PE=1 SV=1	5	3	81.8	1.05977e+06	3.3021e+06	0.320939
High	Master Protein	Q8BQM4	HEAT repeat-containing protein 3 OS=Mus musculus OX=10090 GN=Heatr3 PE=1 SV=1	4	3	74.3	1.05873e+06	1.58191e+06	0.669276
High	Master Protein	Q9D1E6	Tubulin-folding cofactor B OS=Mus musculus OX=10090 GN=Tbcb PE=1 SV=2	11	4	27.4	1.05655e+06	3.54881e+06	0.297719
High	Master Protein	A0A0R4J1W7	CDC23 (Cell division cycle 23, yeast, homolog), isoform CRA_c OS=Mus musculus OX=10090 GN=Cdc23 PE=1 SV=1	5	5	68.5	1.05397e+06	2.65669e+06	0.396723
High	Master Protein	O70310	Glycylpeptide N-tetradecanoyltransferase 1 OS=Mus musculus OX=10090 GN=Nmt1 PE=1 SV=1	13	6	56.9	1.05039e+06	5.06614e+06	0.207334
High	Master Protein	Q91V64	Isochorismatase domain-containing protein 1 OS=Mus musculus OX=10090 GN=Isoc1 PE=1 SV=1	9	3	32	1.04973e+06	2.20814e+06	0.475393
High	Master Protein	G5E884	Non-specific serine/threonine protein kinase OS=Mus musculus OX=10090 GN=Pak1 PE=1 SV=1	34	16	60.6	1.04961e+06	7.65483e+06	0.137118
High	Master Protein	Q9CYG7	Mitochondrial import receptor subunit TOM34 OS=Mus musculus OX=10090 GN=Tomm34 PE=1 SV=1	27	7	34.3	1.04445e+06	4.19442e+06	0.249009
High	Master Protein	P32233	Developmentally-regulated GTP-binding protein 1 OS=Mus musculus OX=10090 GN=Drg1 PE=1 SV=1	25	7	40.5	1.04386e+06	4.49076e+06	0.232445
High	Master Protein	P42669	Transcriptional activator protein Pur-alpha OS=Mus musculus OX=10090 GN=Pura PE=1 SV=1	21	4	34.9	1.03807e+06	6.14298e+06	0.168985
High	Master Protein	O54879	High mobility group protein B3 OS=Mus musculus OX=10090 GN=Hmgb3 PE=1 SV=3	13	2	23	1.03719e+06	9.88649e+06	0.10491
High	Master Protein	Q9ER67	Maged2 protein OS=Mus musculus OX=10090 GN=Maged2 PE=1 SV=1	24	11	65.4	1.03253e+06	9.09575e+06	0.113518
High	Master Protein	P97390	Vacuolar protein sorting-associated protein 45 OS=Mus musculus OX=10090 GN=Vps45 PE=1 SV=1	10	7	65	1.03124e+06	3.97695e+06	0.259304
High	Master Protein	Q9DBE9	pre-rRNA processing protein FTSJ3 OS=Mus musculus OX=10090 GN=Ftsj3 PE=1 SV=1	9	6	95.5	1.03e+06	6.60137e+06	0.156028
High	Master Protein	Q9CPR5	39S ribosomal protein L15, mitochondrial OS=Mus musculus OX=10090 GN=Mrpl15 PE=1 SV=1	18	6	33.5	1.02934e+06	4822857	0.21343
High	Master Protein	A0A286YCV9	Kinesin family member 13B OS=Mus musculus OX=10090 GN=Kif13b PE=1 SV=1	6	11	204.8	1.02929e+06	4.50425e+06	0.228515
High	Master Protein	Q5U3K5	Rab-like protein 6 OS=Mus musculus OX=10090 GN=Rabl6 PE=1 SV=2	13	7	79.8	1.02861e+06	6.18384e+06	0.166338
High	Master Protein	O54692	Centromere/kinetochore protein zw10 homolog OS=Mus musculus OX=10090 GN=Zw10 PE=1 SV=3	4	4	88	1.028e+06	1.47583e+06	0.696561
High	Master Protein	Q9JJT9	Phosphorylated adapter RNA export protein OS=Mus musculus OX=10090 GN=Phax PE=1 SV=1	5	2	43.2	1.02757e+06	3.55954e+06	0.288682
High	Master Protein	Q8BM72	Heat shock 70 kDa protein 13 OS=Mus musculus OX=10090 GN=Hspa13 PE=1 SV=1	6	2	51.7	1.01994e+06	2.75765e+06	0.369858
High	Master Protein	Q64213	Splicing factor 1 OS=Mus musculus OX=10090 GN=Sf1 PE=1 SV=6	11	9	70.4	1.01826e+06	5.69141e+06	0.178912
High	Master Protein	Q7TSJ2	Microtubule-associated protein 6 OS=Mus musculus OX=10090 GN=Map6 PE=1 SV=2	15	9	96.4	1.01719e+06	3.28298e+06	0.309837
High	Master Protein	Q8CI08	SLAIN motif-containing protein 2 OS=Mus musculus OX=10090 GN=Slain2 PE=1 SV=2	11	6	62.3	1.01675e+06	3.4286e+06	0.29655
High	Master Protein	Q9QZ06	Toll-interacting protein OS=Mus musculus OX=10090 GN=Tollip PE=1 SV=1	21	4	30.3	1.01091e+06	3.65262e+06	0.276762
High	Master Protein	A0A2K6EDP7	WD repeat and HMG-box DNA-binding protein 1 OS=Mus musculus OX=10090 GN=Wdhd1 PE=1 SV=1	7	6	124.3	1.01083e+06	2.31637e+06	0.436385
High	Master Protein	Q3TIV5	Zinc finger CCCH domain-containing protein 15 OS=Mus musculus OX=10090 GN=Zc3h15 PE=1 SV=2	15	5	48.3	1.00954e+06	4.69857e+06	0.214861
High	Master Protein	P97376	Protein FRG1 OS=Mus musculus OX=10090 GN=Frg1 PE=1 SV=2	9	3	29.1	1.00826e+06	1.83435e+06	0.549657
High	Master Protein	P35293	Ras-related protein Rab-18 OS=Mus musculus OX=10090 GN=Rab18 PE=1 SV=2	24	6	23	1.00449e+06	3.4413e+06	0.291892
High	Master Protein	P99029	Peroxiredoxin-5, mitochondrial OS=Mus musculus OX=10090 GN=Prdx5 PE=1 SV=2	17	4	21.9	999181	3594037	0.278011
High	Master Protein	Q04447	Creatine kinase B-type OS=Mus musculus OX=10090 GN=Ckb PE=1 SV=1	19	8	42.7	999122	7.61053e+06	0.131281
High	Master Protein	Q4KWH5	1-phosphatidylinositol 4,5-bisphosphate phosphodiesterase eta-1 OS=Mus musculus OX=10090 GN=Plch1 PE=2 SV=1	0	2	187.6	998063	2.69276e+06	0.370646
High	Master Protein	Q8BWZ3	N-alpha-acetyltransferase 25, NatB auxiliary subunit OS=Mus musculus OX=10090 GN=Naa25 PE=1 SV=1	7	7	111.6	996646	3.58937e+06	0.277666
High	Master Protein	Q9D1J3	SAP domain-containing ribonucleoprotein OS=Mus musculus OX=10090 GN=Sarnp PE=1 SV=3	19	5	23.5	993428	6.04532e+06	0.16433
High	Master Protein	Q5SW15	U6 small nuclear RNA (adenine-(43)-N(6))-methyltransferase OS=Mus musculus OX=10090 GN=Mettl16 PE=1 SV=1	10	6	66.8	992653	2.67257e+06	0.371423
High	Master Protein	E9QKC0	Glutamate receptor 2 OS=Mus musculus OX=10090 GN=Gria2 PE=1 SV=1	4	4	98.8	989664	1.34212e+06	0.737387
High	Master Protein	Q6PDI6	Ubiquitin carboxyl-terminal hydrolase MINDY-2 OS=Mus musculus OX=10090 GN=Mindy2 PE=1 SV=1	13	5	65.6	989297	4.02728e+06	0.245649
High	Master Protein	Q6P6J9	Thioredoxin domain-containing protein 15 OS=Mus musculus OX=10090 GN=Txndc15 PE=1 SV=1	22	4	38.1	984611	1.39557e+06	0.705527
High	Master Protein	P55292	Desmocollin-2 OS=Mus musculus OX=10090 GN=Dsc2 PE=1 SV=1	6	4	99.9	982028	2.29572e+06	0.427765
High	Master Protein	Q62283	Tetraspanin-7 OS=Mus musculus OX=10090 GN=Tspan7 PE=1 SV=2	9	4	27.5	977738	1.88913e+06	0.517559
High	Master Protein	Q91VA7	Isocitrate dehydrogenase [NAD] subunit, mitochondrial OS=Mus musculus OX=10090 GN=Idh3b PE=1 SV=1	13	4	42.2	975196	4.11544e+06	0.23696
High	Master Protein	O35316	Sodium- and chloride-dependent taurine transporter OS=Mus musculus OX=10090 GN=Slc6a6 PE=1 SV=2	3	2	69.8	975109	1.35268e+06	0.720871
High	Master Protein	Q9QZ88	Vacuolar protein sorting-associated protein 29 OS=Mus musculus OX=10090 GN=Vps29 PE=1 SV=1	4	2	20.5	972534	1.99347e+06	0.487861
High	Master Protein	Q9D051	Pyruvate dehydrogenase E1 component subunit beta, mitochondrial OS=Mus musculus OX=10090 GN=Pdhb PE=1 SV=1	14	4	38.9	971905	3.04085e+06	0.319616
High	Master Protein	P47856	Glutamine--fructose-6-phosphate aminotransferase [isomerizing] 1 OS=Mus musculus OX=10090 GN=Gfpt1 PE=1 SV=3	9	8	78.5	971194	3699362	0.26253
High	Master Protein	Q8CHW4	Translation initiation factor eIF-2B subunit epsilon OS=Mus musculus OX=10090 GN=Eif2b5 PE=1 SV=1	10	6	80	969138	3.31047e+06	0.292749
High	Master Protein	P49722	Proteasome subunit alpha type-2 OS=Mus musculus OX=10090 GN=Psma2 PE=1 SV=3	24	5	25.9	968090	3852094	0.251315
High	Master Protein	Q8BK08	Transmembrane protein 11, mitochondrial OS=Mus musculus OX=10090 GN=Tmem11 PE=1 SV=1	13	2	21.3	967669	2.80497e+06	0.344983
High	Master Protein	Q9R1T2	SUMO-activating enzyme subunit 1 OS=Mus musculus OX=10090 GN=Sae1 PE=1 SV=1	14	3	38.6	967286	3.89887e+06	0.248094
High	Master Protein	Q8R0F6	Integrin-linked kinase-associated serine/threonine phosphatase 2C OS=Mus musculus OX=10090 GN=Ilkap PE=1 SV=1	5	2	42.7	966642	2.76952e+06	0.349028
High	Master Protein	P51863	V-type proton ATPase subunit d 1 OS=Mus musculus OX=10090 GN=Atp6v0d1 PE=1 SV=2	13	5	40.3	964772	4.78334e+06	0.201694
High	Master Protein	Q62419	Endophilin-A2 OS=Mus musculus OX=10090 GN=Sh3gl1 PE=1 SV=1	16	4	41.5	964501	4.15366e+06	0.232205
High	Master Protein	P23198	Chromobox protein homolog 3 OS=Mus musculus OX=10090 GN=Cbx3 PE=1 SV=2	23	7	20.8	964450	3.84337e+06	0.250939
High	Master Protein	P33610	DNA primase large subunit OS=Mus musculus OX=10090 GN=Prim2 PE=1 SV=1	13	8	58.4	963240	7.10033e+06	0.135661
High	Master Protein	P21278	Guanine nucleotide-binding protein subunit alpha-11 OS=Mus musculus OX=10090 GN=Gna11 PE=1 SV=1	7	3	42	962776	4.09806e+06	0.234935
High	Master Protein	Q3TVK3	Aspartyl aminopeptidase OS=Mus musculus OX=10090 GN=Dnpep PE=1 SV=1	5	2	52.4	958499	3102021	0.308992
High	Master Protein	P28474	Alcohol dehydrogenase class-3 OS=Mus musculus OX=10090 GN=Adh5 PE=1 SV=3	16	6	39.5	954489	4.67312e+06	0.204251
High	Master Protein	Q8CI33	CWF19-like protein 1 OS=Mus musculus OX=10090 GN=Cwf19l1 PE=1 SV=2	13	7	60.2	954295	3.87032e+06	0.246567
High	Master Protein	P52196	Thiosulfate sulfurtransferase OS=Mus musculus OX=10090 GN=Tst PE=1 SV=3	14	5	33.4	953227	3.50906e+06	0.271648
High	Master Protein	Q9WUK4	Replication factor C subunit 2 OS=Mus musculus OX=10090 GN=Rfc2 PE=1 SV=1	6	2	38.7	951280	1.59114e+06	0.597861
High	Master Protein	Q9CPU0	Lactoylglutathione lyase OS=Mus musculus OX=10090 GN=Glo1 PE=1 SV=3	5	2	20.8	951115	2.17916e+06	0.43646
High	Master Protein	Q7TSC1	Protein PRRC2A OS=Mus musculus OX=10090 GN=Prrc2a PE=1 SV=1	10	16	229.1	951006	7.38507e+06	0.128774
High	Master Protein	P61971	Nuclear transport factor 2 OS=Mus musculus OX=10090 GN=Nutf2 PE=1 SV=1	6	2	14.5	950688	2.12195e+06	0.448026
High	Master Protein	Q6NS46	Protein RRP5 homolog OS=Mus musculus OX=10090 GN=Pdcd11 PE=1 SV=2	7	10	207.6	947274	3.84356e+06	0.246457
High	Master Protein	Q9DBL7	Bifunctional coenzyme A synthase OS=Mus musculus OX=10090 GN=Coasy PE=1 SV=2	7	3	62	946986	3.21708e+06	0.294362
High	Master Protein	Q9CQQ7	ATP synthase F(0) complex subunit B1, mitochondrial OS=Mus musculus OX=10090 GN=Atp5f1 PE=1 SV=1	9	2	28.9	946947	3.39129e+06	0.279229
High	Master Protein	Q6ZWZ7	60S ribosomal protein L17 OS=Mus musculus OX=10090 GN=Rpl17 PE=1 SV=1	27	5	21.4	945783	8.77604e+06	0.107769
High	Master Protein	Q69ZS7	HBS1-like protein OS=Mus musculus OX=10090 GN=Hbs1l PE=1 SV=2	13	7	75.1	943554	2.64685e+06	0.356482
High	Master Protein	A2A8U2	Transmembrane protein 201 OS=Mus musculus OX=10090 GN=Tmem201 PE=1 SV=1	6	3	72.5	941722	293622	3.20725
High	Master Protein	A2AIX1	Protein transport protein sec16 OS=Mus musculus OX=10090 GN=Sec16a PE=1 SV=1	6	9	256.3	940195	3.44959e+06	0.272553
High	Master Protein	Q8BGT7	Survival of motor neuron-related-splicing factor 30 OS=Mus musculus OX=10090 GN=Smndc1 PE=1 SV=1	25	4	26.7	939258	4.81865e+06	0.194922
High	Master Protein	O70589	Peripheral plasma membrane protein CASK OS=Mus musculus OX=10090 GN=Cask PE=1 SV=2	5	3	105	935772	3.10884e+06	0.301003
High	Master Protein	G3X914	Cullin-5 OS=Mus musculus OX=10090 GN=Cul5 PE=1 SV=1	4	4	99	931668	2.62117e+06	0.35544
High	Master Protein	K4DI59	DNA ligase OS=Mus musculus OX=10090 GN=Lig3 PE=1 SV=1	4	5	113.1	925925	3.10423e+06	0.298278
High	Master Protein	Q921F4	Heterogeneous nuclear ribonucleoprotein L-like OS=Mus musculus OX=10090 GN=Hnrnpll PE=1 SV=3	19	10	64.1	925314	4.76244e+06	0.194294
High	Master Protein	Q91WM1	Spermatid perinuclear RNA-binding protein OS=Mus musculus OX=10090 GN=Strbp PE=1 SV=1	12	9	73.7	920384	2.67043e+06	0.344657
High	Master Protein	A2AE27	AMP deaminase OS=Mus musculus OX=10090 GN=Ampd2 PE=1 SV=1	5	4	94.6	919530	1.40291e+06	0.655443
High	Master Protein	P35486	Pyruvate dehydrogenase E1 component subunit alpha, somatic form, mitochondrial OS=Mus musculus OX=10090 GN=Pdha1 PE=1 SV=1	13	4	43.2	917402	5.403e+06	0.169795
High	Master Protein	Q99L45	Eukaryotic translation initiation factor 2 subunit 2 OS=Mus musculus OX=10090 GN=Eif2s2 PE=1 SV=1	22	7	38.1	915359	6.58261e+06	0.139057
High	Master Protein	Q9R1P3	Proteasome subunit beta type-2 OS=Mus musculus OX=10090 GN=Psmb2 PE=1 SV=1	21	3	22.9	914231	1.69116e+06	0.540593
High	Master Protein	P63011	Ras-related protein Rab-3A OS=Mus musculus OX=10090 GN=Rab3a PE=1 SV=1	23	7	25	913060	3.09858e+06	0.29467
High	Master Protein	Q3UMU9	Hepatoma-derived growth factor-related protein 2 OS=Mus musculus OX=10090 GN=Hdgfl2 PE=1 SV=1	6	5	74.2	912599	4.33352e+06	0.210591
High	Master Protein	O89090	Transcription factor Sp1 OS=Mus musculus OX=10090 GN=Sp1 PE=1 SV=2	4	2	80.7	912362	1.72801e+06	0.527984
High	Master Protein	Q9Z127	Large neutral amino acids transporter small subunit 1 OS=Mus musculus OX=10090 GN=Slc7a5 PE=1 SV=2	4	3	55.8	911236	2.16734e+06	0.42044
High	Master Protein	G5E8V9	ADP-ribosylation factor-interacting protein 1 OS=Mus musculus OX=10090 GN=Arfip1 PE=1 SV=1	10	3	41.5	910877	3.18746e+06	0.285769
High	Master Protein	Q91VK1	Basic leucine zipper and W2 domain-containing protein 2 OS=Mus musculus OX=10090 GN=Bzw2 PE=1 SV=1	15	6	48	909806	3.85012e+06	0.236306
High	Master Protein	A0A087WQT6	Caspase-8 OS=Mus musculus OX=10090 GN=Casp8 PE=1 SV=1	4	2	57.8	909028	1.32488e+06	0.686119
High	Master Protein	Q4QQM4	Tumor protein p53-inducible protein 11 OS=Mus musculus OX=10090 GN=Trp53i11 PE=1 SV=1	13	3	20.9	907468	3.75635e+06	0.241583
High	Master Protein	Q8C0J2	Autophagy-related protein 16-1 OS=Mus musculus OX=10090 GN=Atg16l1 PE=1 SV=1	11	7	68.1	906827	3.28279e+06	0.276237
High	Master Protein	O70591	Prefoldin subunit 2 OS=Mus musculus OX=10090 GN=Pfdn2 PE=1 SV=2	27	4	16.5	902251	2.86284e+06	0.31516
High	Master Protein	Q8BX09	Retinoblastoma-binding protein 5 OS=Mus musculus OX=10090 GN=Rbbp5 PE=1 SV=2	8	4	59.1	902153	3.39224e+06	0.265946
High	Master Protein	O88665	Bromodomain-containing protein 7 OS=Mus musculus OX=10090 GN=Brd7 PE=1 SV=1	6	3	74	898508	3.02821e+06	0.296713
High	Master Protein	Q8K201	Keratinocyte-associated transmembrane protein 2 OS=Mus musculus OX=10090 GN=Kct2 PE=1 SV=2	9	3	28	894618	2761027	0.324016
High	Master Protein	A2ATU9	Histone acetyltransferase type B catalytic subunit OS=Mus musculus OX=10090 GN=Hat1 PE=1 SV=1	17	6	50.2	894090	3.4618e+06	0.258273
High	Master Protein	P57759	Endoplasmic reticulum resident protein 29 OS=Mus musculus OX=10090 GN=Erp29 PE=1 SV=2	14	3	28.8	886280	3.6607e+06	0.242107
High	Master Protein	F8VQC7	Kinectin OS=Mus musculus OX=10090 GN=Ktn1 PE=1 SV=1	10	12	152.4	880442	3.92213e+06	0.22448
High	Master Protein	F8VPU2	FERM, ARHGEF and pleckstrin domain-containing protein 1 OS=Mus musculus OX=10090 GN=Farp1 PE=1 SV=1	5	4	118.8	879911	4.0093e+06	0.219468
High	Master Protein	Q6ZPZ3	Zinc finger CCCH domain-containing protein 4 OS=Mus musculus OX=10090 GN=Zc3h4 PE=1 SV=2	25	19	140.9	879385	2.30314e+07	0.0381819
High	Master Protein	D3YXK1	Atherin OS=Mus musculus OX=10090 GN=Samd1 PE=1 SV=1	13	5	54.5	875352	3.27006e+06	0.267687
High	Master Protein	Q8BYY4	Tetratricopeptide repeat protein 39B OS=Mus musculus OX=10090 GN=Ttc39b PE=1 SV=1	5	4	70.2	874616	1.69656e+06	0.515524
High	Master Protein	Q8R323	Replication factor C subunit 3 OS=Mus musculus OX=10090 GN=Rfc3 PE=1 SV=1	14	5	40.5	874202	2.64182e+06	0.330909
High	Master Protein	P63005	Platelet-activating factor acetylhydrolase IB subunit alpha OS=Mus musculus OX=10090 GN=Pafah1b1 PE=1 SV=2	22	10	46.6	872718	4.98487e+06	0.175073
High	Master Protein	A2ALS7	Rap1 GTPase-activating protein 1 (Fragment) OS=Mus musculus OX=10090 GN=Rap1gap PE=1 SV=1	34	13	43.4	872650	3.32751e+06	0.262253
High	Master Protein	Q8BH24	Transmembrane 9 superfamily member 4 OS=Mus musculus OX=10090 GN=Tm9sf4 PE=1 SV=1	4	4	74.6	871254	5.29491e+06	0.164546
High	Master Protein	Q99LG2	Transportin-2 OS=Mus musculus OX=10090 GN=Tnpo2 PE=1 SV=1	11	12	100.4	870410	2.62684e+06	0.331353
High	Master Protein	Q99NF7	Ppm1b protein OS=Mus musculus OX=10090 GN=Ppm1b PE=1 SV=1	11	4	52.1	869576	2.73135e+06	0.318369
High	Master Protein	G5E8J3	Bromodomain and WD repeat domain containing 2, isoform CRA_a OS=Mus musculus OX=10090 GN=Wdr11 PE=1 SV=1	4	4	135.9	868686	1.89029e+06	0.459552
High	Master Protein	O89023	Tripeptidyl-peptidase 1 OS=Mus musculus OX=10090 GN=Tpp1 PE=1 SV=2	9	3	61.3	866867	2.49624e+06	0.34727
High	Master Protein	G5E8C4	MCG142017, isoform CRA_a OS=Mus musculus OX=10090 GN=Tmtc3 PE=1 SV=1	4	5	104.1	866420	2.08661e+06	0.415228
High	Master Protein	A2A9M4	Dedicator of cytokinesis protein 7 OS=Mus musculus OX=10090 GN=Dock7 PE=1 SV=2	4	7	241.3	862597	2.68398e+06	0.321387
High	Master Protein	O35730	E3 ubiquitin-protein ligase RING1 OS=Mus musculus OX=10090 GN=Ring1 PE=1 SV=2	20	8	42.6	858770	3.99073e+06	0.215191
High	Master Protein	Q9D0R8	Protein LSM12 homolog OS=Mus musculus OX=10090 GN=Lsm12 PE=1 SV=1	7	2	21.7	854942	1.48626e+06	0.57523
High	Master Protein	O08795	Glucosidase 2 subunit beta OS=Mus musculus OX=10090 GN=Prkcsh PE=1 SV=1	7	4	58.8	852032	4.40521e+06	0.193415
High	Master Protein	F8WIA1	CAP-Gly domain-containing linker protein 1 OS=Mus musculus OX=10090 GN=Clip1 PE=1 SV=1	6	9	161.1	851550	5.38813e+06	0.158042
High	Master Protein	Q8CGC6	RNA-binding protein 28 OS=Mus musculus OX=10090 GN=Rbm28 PE=1 SV=4	11	7	84.2	851359	4.61194e+06	0.184599
High	Master Protein	Q7TQD7	Myo1b protein OS=Mus musculus OX=10090 GN=Myo1b PE=1 SV=1	5	4	132	849725	2.45553e+06	0.346046
High	Master Protein	P26450	Phosphatidylinositol 3-kinase regulatory subunit alpha OS=Mus musculus OX=10090 GN=Pik3r1 PE=1 SV=2	13	6	83.5	848602	4.58891e+06	0.184925
High	Master Protein	Q9CQ60	6-phosphogluconolactonase OS=Mus musculus OX=10090 GN=Pgls PE=1 SV=1	16	2	27.2	845586	2.59499e+06	0.325853
High	Master Protein	Q9EQM6	Microprocessor complex subunit DGCR8 OS=Mus musculus OX=10090 GN=Dgcr8 PE=1 SV=2	4	4	86.3	844206	2.11608e+06	0.398947
High	Master Protein	Q91YJ2	Sorting nexin-4 OS=Mus musculus OX=10090 GN=Snx4 PE=1 SV=1	12	5	51.7	842809	2.50262e+06	0.33677
High	Master Protein	Q8BGF8	Solute carrier family 35 member D3 OS=Mus musculus OX=10090 GN=Slc35d3 PE=2 SV=1	13	6	44.9	840822	2.02093e+06	0.416058
High	Master Protein	Q99LH1	Nucleolar GTP-binding protein 2 OS=Mus musculus OX=10090 GN=Gnl2 PE=1 SV=2	12	10	83.3	837729	4.44883e+06	0.188303
High	Master Protein	Q99P72	Reticulon-4 OS=Mus musculus OX=10090 GN=Rtn4 PE=1 SV=2	14	7	126.5	835966	3.6271e+06	0.230477
High	Master Protein	Q8BG30	Negative elongation factor A OS=Mus musculus OX=10090 GN=Nelfa PE=1 SV=1	8	5	57.5	835409	2.67084e+06	0.312789
High	Master Protein	Q6PGN3	Serine/threonine-protein kinase DCLK2 OS=Mus musculus OX=10090 GN=Dclk2 PE=1 SV=1	7	4	82.9	833289	2.62168e+06	0.317846
High	Master Protein	Q922H1	Protein arginine N-methyltransferase 3 OS=Mus musculus OX=10090 GN=Prmt3 PE=1 SV=2	5	2	59.9	831995	1.97092e+06	0.422135
High	Master Protein	Q6NSR8	Probable aminopeptidase NPEPL1 OS=Mus musculus OX=10090 GN=Npepl1 PE=1 SV=1	5	2	55.9	831485	2.70292e+06	0.307625
High	Master Protein	P30658	Chromobox protein homolog 2 OS=Mus musculus OX=10090 GN=Cbx2 PE=1 SV=2	9	3	54.9	829731	2.51037e+06	0.330521
High	Master Protein	Q99M31	Heat shock 70 kDa protein 14 OS=Mus musculus OX=10090 GN=Hspa14 PE=1 SV=2	18	6	54.6	828901	3.21935e+06	0.257475
High	Master Protein	G5E8I8	Calcium homeostasis endoplasmic reticulum protein OS=Mus musculus OX=10090 GN=Cherp PE=1 SV=2	4	3	107.6	828311	3.10416e+06	0.266839
High	Master Protein	P29595	NEDD8 OS=Mus musculus OX=10090 GN=Nedd8 PE=1 SV=2	35	3	9	828133	6.07569e+06	0.136303
High	Master Protein	E9Q3G8	Nucleoporin 153 OS=Mus musculus OX=10090 GN=Nup153 PE=1 SV=1	10	9	151.9	824532	3.7448e+06	0.220181
High	Master Protein	Q9CY64	Biliverdin reductase A OS=Mus musculus OX=10090 GN=Blvra PE=1 SV=1	21	5	33.5	821538	5.17057e+06	0.158887
High	Master Protein	P62307	Small nuclear ribonucleoprotein F OS=Mus musculus OX=10090 GN=Snrpf PE=1 SV=1	15	4	9.7	820118	1.89223e+06	0.433413
High	Master Protein	Q91VE6	MKI67 FHA domain-interacting nucleolar phosphoprotein OS=Mus musculus OX=10090 GN=Nifk PE=1 SV=1	20	5	36.2	818570	6.47437e+06	0.126432
High	Master Protein	Q8K400	Syntaxin-binding protein 5 OS=Mus musculus OX=10090 GN=Stxbp5 PE=1 SV=3	2	2	127.6	816974	1.77253e+06	0.460908
High	Master Protein	Q91WC0	Histone-lysine N-methyltransferase setd3 OS=Mus musculus OX=10090 GN=Setd3 PE=1 SV=1	18	7	67.1	816935	4.63208e+06	0.176365
High	Master Protein	O35129	Prohibitin-2 OS=Mus musculus OX=10090 GN=Phb2 PE=1 SV=1	16	5	33.3	815943	2.73188e+06	0.298675
High	Master Protein	Q00422	GA-binding protein alpha chain OS=Mus musculus OX=10090 GN=Gabpa PE=1 SV=2	4	2	51.3	815841	1.43884e+06	0.567013
High	Master Protein	Q9R0Y5	Adenylate kinase isoenzyme 1 OS=Mus musculus OX=10090 GN=Ak1 PE=1 SV=1	19	3	21.5	815303	2.74043e+06	0.297509
High	Master Protein	I1E4X5	RIKEN cDNA 9030624J02 gene OS=Mus musculus OX=10090 GN=9030624J02Rik PE=1 SV=1	13	9	111.9	815267	6.28749e+06	0.129665
High	Master Protein	Q9CQ48	NudC domain-containing protein 2 OS=Mus musculus OX=10090 GN=Nudcd2 PE=1 SV=1	18	3	17.6	814697	3475760	0.234394
High	Master Protein	A0A0J9YUD5	Nucleoporin 205 OS=Mus musculus OX=10090 GN=Nup205 PE=1 SV=1	2	4	233	812607	3.11726e+06	0.26068
High	Master Protein	E9QMC1	Cingulin OS=Mus musculus OX=10090 GN=Cgn PE=1 SV=1	9	11	136.5	804924	3.92333e+06	0.205163
High	Master Protein	Q91YL3	Uridine-cytidine kinase-like 1 OS=Mus musculus OX=10090 GN=Uckl1 PE=1 SV=1	7	4	60.8	803513	1.56751e+06	0.512606
High	Master Protein	Q8VHL1	Histone-lysine N-methyltransferase SETD7 OS=Mus musculus OX=10090 GN=Setd7 PE=1 SV=2	7	3	40.5	803039	1.68581e+06	0.476352
High	Master Protein	D3Z4J3	Unconventional myosin-Va OS=Mus musculus OX=10090 GN=Myo5a PE=1 SV=1	3	5	215.4	801920	2.90277e+06	0.27626
High	Master Protein	A2A7A7	GDH/6PGL endoplasmic bifunctional protein OS=Mus musculus OX=10090 GN=H6pd PE=1 SV=1	6	5	89.9	800481	2.1218e+06	0.377265
High	Master Protein	A0A0R4J007	Paladin OS=Mus musculus OX=10090 GN=Pald1 PE=1 SV=1	5	4	96.7	799276	1.84214e+06	0.433884
High	Master Protein	P61087	Ubiquitin-conjugating enzyme E2 K OS=Mus musculus OX=10090 GN=Ube2k PE=1 SV=3	24	4	22.4	798143	3.43207e+06	0.232555
High	Master Protein	Q8R307	Vacuolar protein sorting-associated protein 18 homolog OS=Mus musculus OX=10090 GN=Vps18 PE=1 SV=2	2	3	110.1	797568	1.30619e+06	0.610608
High	Master Protein	Q9DBC3	Cap-specific mRNA (nucleoside-2'-O-)-methyltransferase 1 OS=Mus musculus OX=10090 GN=Cmtr1 PE=1 SV=1	8	6	95.6	795642	5.23267e+06	0.152053
High	Master Protein	O88351	Inhibitor of nuclear factor kappa-B kinase subunit beta OS=Mus musculus OX=10090 GN=Ikbkb PE=1 SV=1	5	5	86.6	793915	2.03362e+06	0.390394
High	Master Protein	Q5SSL4	Active breakpoint cluster region-related protein OS=Mus musculus OX=10090 GN=Abr PE=1 SV=1	5	4	97.6	793350	2.74172e+06	0.289362
High	Master Protein	P62830	60S ribosomal protein L23 OS=Mus musculus OX=10090 GN=Rpl23 PE=1 SV=1	27	4	14.9	792077	3.36327e+06	0.235508
High	Master Protein	P60521	Gamma-aminobutyric acid receptor-associated protein-like 2 OS=Mus musculus OX=10090 GN=Gabarapl2 PE=1 SV=1	16	2	13.7	790268	1.51726e+06	0.520852
High	Master Protein	P97449	Aminopeptidase N OS=Mus musculus OX=10090 GN=Anpep PE=1 SV=4	6	7	109.6	789222	1.88341e+06	0.41904
High	Master Protein	Q922Q1	Mitochondrial amidoxime reducing component 2 OS=Mus musculus OX=10090 GN=Marc2 PE=1 SV=1	5	3	38.2	789143	2.1628e+06	0.364871
High	Master Protein	Q5U458	DnaJ homolog subfamily C member 11 OS=Mus musculus OX=10090 GN=Dnajc11 PE=1 SV=2	11	5	63.2	788377	1.25865e+06	0.626369
High	Master Protein	D3YWD3	Transmembrane protein 245 OS=Mus musculus OX=10090 GN=Tmem245 PE=1 SV=1	3	3	97.7	782833	456420	1.71516
High	Master Protein	Q922S8	Kinesin-like protein KIF2C OS=Mus musculus OX=10090 GN=Kif2c PE=1 SV=1	8	7	81	780463	2.09887e+06	0.37185
High	Master Protein	Q9D819	Inorganic pyrophosphatase OS=Mus musculus OX=10090 GN=Ppa1 PE=1 SV=1	11	3	32.6	778821	2.71857e+06	0.286481
High	Master Protein	Q3V009	Transmembrane emp24 domain-containing protein 1 OS=Mus musculus OX=10090 GN=Tmed1 PE=1 SV=1	17	3	25.2	778380	133082	5.84889
High	Master Protein	Q9WVK4	EH domain-containing protein 1 OS=Mus musculus OX=10090 GN=Ehd1 PE=1 SV=1	27	10	60.6	775986	5.71079e+06	0.135881
High	Master Protein	Q6ZQ73	Cullin-associated NEDD8-dissociated protein 2 OS=Mus musculus OX=10090 GN=Cand2 PE=1 SV=2	3	4	135.5	775438	2138978	0.362527
High	Master Protein	P70362	Ubiquitin recognition factor in ER-associated degradation protein 1 OS=Mus musculus OX=10090 GN=Ufd1 PE=1 SV=2	8	3	34.5	770410	1.82372e+06	0.422439
High	Master Protein	Q9ERG0	LIM domain and actin-binding protein 1 OS=Mus musculus OX=10090 GN=Lima1 PE=1 SV=3	9	7	84	768133	3.13354e+06	0.245133
High	Master Protein	Q9Z2I8	Succinate--CoA ligase [GDP-forming] subunit beta, mitochondrial OS=Mus musculus OX=10090 GN=Suclg2 PE=1 SV=3	10	5	46.8	767030	2.92603e+06	0.26214
High	Master Protein	Q9D0R4	Probable ATP-dependent RNA helicase DDX56 OS=Mus musculus OX=10090 GN=Ddx56 PE=2 SV=1	6	4	61.2	759298	2.51602e+06	0.301785
High	Master Protein	Q3USK5	Transcriptional enhancer factor TEF-1 OS=Mus musculus OX=10090 GN=Tead1 PE=1 SV=1	2	2	49.1	759167	3.30498e+06	0.229704
High	Master Protein	Q9CR67	Transmembrane protein 33 OS=Mus musculus OX=10090 GN=Tmem33 PE=1 SV=1	12	4	28	757085	3.51809e+06	0.215198
High	Master Protein	Q68FH4	N-acetylgalactosamine kinase OS=Mus musculus OX=10090 GN=Galk2 PE=1 SV=1	5	2	50.5	755983	2.53254e+06	0.298507
High	Master Protein	Q9WU28	Prefoldin subunit 5 OS=Mus musculus OX=10090 GN=Pfdn5 PE=1 SV=1	25	5	17.3	753907	3.2514e+06	0.231871
High	Master Protein	Q91VK4	Integral membrane protein 2C OS=Mus musculus OX=10090 GN=Itm2c PE=1 SV=2	20	4	30.5	753094	1.9385e+06	0.388493
High	Master Protein	Q6NZR5	Superkiller viralicidic activity 2-like (S. cerevisiae) OS=Mus musculus OX=10090 GN=Skiv2l PE=1 SV=1	8	7	137.4	751685	2.5754e+06	0.291871
High	Master Protein	O35350	Calpain-1 catalytic subunit OS=Mus musculus OX=10090 GN=Capn1 PE=1 SV=1	7	6	82.1	750845	3.51937e+06	0.213347
High	Master Protein	P97765	WW domain-binding protein 2 OS=Mus musculus OX=10090 GN=Wbp2 PE=1 SV=1	8	4	28	749181	3.06173e+06	0.244692
High	Master Protein	Q9CS42	Ribose-phosphate pyrophosphokinase 2 OS=Mus musculus OX=10090 GN=Prps2 PE=1 SV=4	20	9	34.8	749014	1.65694e+06	0.452046
High	Master Protein	Q8BGT8	Phytanoyl-CoA hydroxylase-interacting protein-like OS=Mus musculus OX=10090 GN=Phyhipl PE=1 SV=1	3	2	42.3	748688	1.97857e+06	0.378399
High	Master Protein	Q922R8	Protein disulfide-isomerase A6 OS=Mus musculus OX=10090 GN=Pdia6 PE=1 SV=3	37	15	48.1	742537	3.04556e+06	0.24381
High	Master Protein	Q9JHZ2	Progressive ankylosis protein OS=Mus musculus OX=10090 GN=Ankh PE=2 SV=1	9	3	54.3	739560	3.4362e+06	0.215226
High	Master Protein	Q7TSZ8	Nucleus accumbens-associated protein 1 OS=Mus musculus OX=10090 GN=Nacc1 PE=1 SV=1	6	2	56.5	738634	1.3545e+06	0.545317
High	Master Protein	O88622	Poly(ADP-ribose) glycohydrolase OS=Mus musculus OX=10090 GN=Parg PE=1 SV=2	7	5	109.3	737786	2.31509e+06	0.318686
High	Master Protein	Q9DCA5	Ribosome biogenesis protein BRX1 homolog OS=Mus musculus OX=10090 GN=Brix1 PE=1 SV=3	10	4	41.2	735699	2.23918e+06	0.328558
High	Master Protein	P55264	Adenosine kinase OS=Mus musculus OX=10090 GN=Adk PE=1 SV=2	12	5	40.1	735190	4.76949e+06	0.154144
High	Master Protein	Q811P8	Rho GTPase-activating protein 32 OS=Mus musculus OX=10090 GN=Arhgap32 PE=1 SV=2	3	7	229.6	732786	3.46891e+06	0.211244
High	Master Protein	Q8K363	ATP-dependent RNA helicase DDX18 OS=Mus musculus OX=10090 GN=Ddx18 PE=1 SV=1	12	7	74.1	731046	2.66247e+06	0.274574
High	Master Protein	Q3UGB5	DAZ associated protein 1, isoform CRA_b OS=Mus musculus OX=10090 GN=Dazap1 PE=1 SV=1	14	5	43.1	728705	4.33431e+06	0.168125
High	Master Protein	P84084	ADP-ribosylation factor 5 OS=Mus musculus OX=10090 GN=Arf5 PE=1 SV=2	48	15	20.5	728223	2108217	0.345421
High	Master Protein	E0CXE7	CST complex subunit CTC1 OS=Mus musculus OX=10090 GN=Ctc1 PE=1 SV=1	6	6	106.4	727820	1.90871e+06	0.381316
High	Master Protein	Q91WE6	Threonylcarbamoyladenosine tRNA methylthiotransferase OS=Mus musculus OX=10090 GN=Cdkal1 PE=2 SV=1	4	2	65.2	727389	903514	0.805067
High	Master Protein	Q9D880	Mitochondrial import inner membrane translocase subunit TIM50 OS=Mus musculus OX=10090 GN=Timm50 PE=1 SV=1	11	3	39.8	726038	2.23304e+06	0.325134
High	Master Protein	A0A0A6YY83	Protocadherin 7 OS=Mus musculus OX=10090 GN=Pcdh7 PE=1 SV=1	4	5	136.7	724560	2.01261e+06	0.360011
High	Master Protein	P05532	Mast/stem cell growth factor receptor Kit OS=Mus musculus OX=10090 GN=Kit PE=1 SV=3	6	6	109.3	724178	2.35444e+06	0.307579
High	Master Protein	O88844	Isocitrate dehydrogenase [NADP] cytoplasmic OS=Mus musculus OX=10090 GN=Idh1 PE=1 SV=2	12	6	46.6	723691	3.2193e+06	0.224798
High	Master Protein	Q7TNB8	Protein strawberry notch homolog 2 OS=Mus musculus OX=10090 GN=Sbno2 PE=1 SV=1	2	3	149.2	723668	1.62734e+06	0.444694
High	Master Protein	Q9JLN9	Serine/threonine-protein kinase mTOR OS=Mus musculus OX=10090 GN=Mtor PE=1 SV=2	3	6	288.6	723092	2.74831e+06	0.263104
High	Master Protein	Q6PDL0	Cytoplasmic dynein 1 light intermediate chain 2 OS=Mus musculus OX=10090 GN=Dync1li2 PE=1 SV=2	10	4	54.2	719578	2.0378e+06	0.353116
High	Master Protein	P42125	Enoyl-CoA delta isomerase 1, mitochondrial OS=Mus musculus OX=10090 GN=Eci1 PE=1 SV=2	11	2	32.2	719104	2.49013e+06	0.288782
High	Master Protein	Q9QYY8	Spastin OS=Mus musculus OX=10090 GN=Spast PE=1 SV=3	7	4	66.4	718961	2.9937e+06	0.240158
High	Master Protein	Q8K296	Myotubularin-related protein 3 OS=Mus musculus OX=10090 GN=Mtmr3 PE=1 SV=2	4	3	133.8	718367	1.23679e+06	0.580833
High	Master Protein	Q6DFV1	Condensin-2 complex subunit G2 OS=Mus musculus OX=10090 GN=Ncapg2 PE=1 SV=2	4	4	130.8	716456	1833931	0.390667
High	Master Protein	Q91VJ4	Serine/threonine-protein kinase 38 OS=Mus musculus OX=10090 GN=Stk38 PE=1 SV=1	15	4	54.1	715542	4.09966e+06	0.174537
High	Master Protein	Q9Z2D0	Myotubularin-related protein 9 OS=Mus musculus OX=10090 GN=Mtmr9 PE=1 SV=2	3	2	62.9	715446	2.35834e+06	0.303368
High	Master Protein	Q6PGH2	Jupiter microtubule associated homolog 2 OS=Mus musculus OX=10090 GN=Jpt2 PE=1 SV=1	22	5	20	715304	4.45017e+06	0.160736
High	Master Protein	Q9D787	Peptidyl-prolyl cis-trans isomerase-like 2 OS=Mus musculus OX=10090 GN=Ppil2 PE=1 SV=2	20	9	59	714738	3.94979e+06	0.180956
High	Master Protein	Q9JIG7	Coiled-coil domain-containing protein 22 OS=Mus musculus OX=10090 GN=Ccdc22 PE=1 SV=1	12	7	70.8	711877	2.82786e+06	0.251737
High	Master Protein	A0A0R4IZX6	AP-1 complex subunit mu-2 OS=Mus musculus OX=10090 GN=Ap1m2 PE=1 SV=1	17	6	48.1	711818	6.88328e+06	0.103413
High	Master Protein	Q8BZW8	NHL repeat-containing protein 2 OS=Mus musculus OX=10090 GN=Nhlrc2 PE=1 SV=1	12	8	78.4	710851	4.71795e+06	0.150669
High	Master Protein	O54946	DnaJ homolog subfamily B member 6 OS=Mus musculus OX=10090 GN=Dnajb6 PE=1 SV=4	10	7	39.8	709420	3.39563e+06	0.208922
High	Master Protein	A2BFF9	Cytoplasmic dynein 1 intermediate chain 2 OS=Mus musculus OX=10090 GN=Dync1i2 PE=1 SV=1	16	6	71.4	706566	3.75471e+06	0.188181
High	Master Protein	A0A2I3BRL8	Predicted gene 7324 OS=Mus musculus OX=10090 GN=Gm7324 PE=4 SV=1	12	4	42.2	704214	2.29064e+06	0.307431
High	Master Protein	P51859	Hepatoma-derived growth factor OS=Mus musculus OX=10090 GN=Hdgf PE=1 SV=2	43	6	26.3	704091	4.78801e+06	0.147053
High	Master Protein	Q3TF45	Chloride channel protein OS=Mus musculus OX=10090 GN=Clcn3 PE=1 SV=1	2	3	96.6	704075	1.81924e+06	0.387017
High	Master Protein	Q3UKJ7	WD40 repeat-containing protein SMU1 OS=Mus musculus OX=10090 GN=Smu1 PE=2 SV=2	15	6	57.5	703642	3.28926e+06	0.213921
High	Master Protein	Q9CZ62	Centrosomal protein of 97 kDa OS=Mus musculus OX=10090 GN=Cep97 PE=1 SV=1	11	7	94.6	701427	2.23056e+06	0.314462
High	Master Protein	Q8BK72	28S ribosomal protein S27, mitochondrial OS=Mus musculus OX=10090 GN=Mrps27 PE=1 SV=2	3	2	47.7	700614	2.00107e+06	0.35012
High	Master Protein	Q8C166	Copine-1 OS=Mus musculus OX=10090 GN=Cpne1 PE=1 SV=1	3	2	58.8	696358	1.49217e+06	0.466675
High	Master Protein	E9PUQ7	tRNA (uracil-5-)-methyltransferase homolog A OS=Mus musculus OX=10090 GN=Trmt2a PE=1 SV=1	4	2	67.6	693248	1.09562e+06	0.632747
High	Master Protein	P51855	Glutathione synthetase OS=Mus musculus OX=10090 GN=Gss PE=1 SV=1	10	3	52.2	692445	1.87562e+06	0.369182
High	Master Protein	A0A0A6YVU8	MCG119397 OS=Mus musculus OX=10090 GN=Gm9774 PE=4 SV=1	9	3	42.1	691822	2.05458e+06	0.336721
High	Master Protein	Q01147	Cyclic AMP-responsive element-binding protein 1 OS=Mus musculus OX=10090 GN=Creb1 PE=1 SV=1	17	5	36.7	691611	3.97315e+06	0.174071
High	Master Protein	P61924	Coatomer subunit zeta-1 OS=Mus musculus OX=10090 GN=Copz1 PE=1 SV=1	21	5	20.2	691198	1.63369e+06	0.423091
High	Master Protein	D3YWX2	YLP motif-containing protein 1 OS=Mus musculus OX=10090 GN=Ylpm1 PE=1 SV=2	5	9	240.9	691093	3.33653e+06	0.207129
High	Master Protein	Q8K2Q9	Shootin-1 OS=Mus musculus OX=10090 GN=Shtn1 PE=1 SV=1	16	6	71.3	689733	5.01514e+06	0.13753
High	Master Protein	Q9R0H0	Peroxisomal acyl-coenzyme A oxidase 1 OS=Mus musculus OX=10090 GN=Acox1 PE=1 SV=5	15	7	74.6	688087	4.43319e+06	0.155213
High	Master Protein	Q11136	Xaa-Pro dipeptidase OS=Mus musculus OX=10090 GN=Pepd PE=1 SV=3	4	2	55	685996	1.32152e+06	0.519095
High	Master Protein	Q61081	Hsp90 co-chaperone Cdc37 OS=Mus musculus OX=10090 GN=Cdc37 PE=1 SV=1	26	9	44.6	685883	5.83031e+06	0.117641
High	Master Protein	P48428	Tubulin-specific chaperone A OS=Mus musculus OX=10090 GN=Tbca PE=1 SV=3	8	2	12.8	685146	4989459	0.137319
High	Master Protein	Q9WTX5	S-phase kinase-associated protein 1 OS=Mus musculus OX=10090 GN=Skp1 PE=1 SV=3	27	3	18.7	683033	3.6804e+06	0.185587
High	Master Protein	Q3TWN3	Metal transporter CNNM2 OS=Mus musculus OX=10090 GN=Cnnm2 PE=1 SV=3	7	5	96.6	679256	3.14918e+06	0.215693
High	Master Protein	Q8BUH8	Sentrin-specific protease 7 OS=Mus musculus OX=10090 GN=Senp7 PE=1 SV=1	6	4	116.3	679047	2.25366e+06	0.301309
High	Master Protein	P26516	26S proteasome non-ATPase regulatory subunit 7 OS=Mus musculus OX=10090 GN=Psmd7 PE=1 SV=2	34	7	36.5	677798	4.28661e+06	0.15812
High	Master Protein	P54276	DNA mismatch repair protein Msh6 OS=Mus musculus OX=10090 GN=Msh6 PE=1 SV=3	6	7	151	676454	3.17044e+06	0.213363
High	Master Protein	F6Y616	Polyadenylate-binding protein-interacting protein 1 OS=Mus musculus OX=10090 GN=Paip1 PE=1 SV=2	2	2	53.9	673295	1.67199e+06	0.402692
High	Master Protein	Q9CQJ6	Density-regulated protein OS=Mus musculus OX=10090 GN=Denr PE=1 SV=1	14	4	22.2	672413	3.31254e+06	0.20299
High	Master Protein	P70318	Nucleolysin TIAR OS=Mus musculus OX=10090 GN=Tial1 PE=1 SV=1	15	4	43.4	671786	4.26764e+06	0.157414
High	Master Protein	A0A0N4SVL0	Eukaryotic translation initiation factor 4 gamma 3 OS=Mus musculus OX=10090 GN=Eif4g3 PE=1 SV=1	6	14	192.7	666284	2.39514e+06	0.278182
High	Master Protein	P08556	GTPase NRas OS=Mus musculus OX=10090 GN=Nras PE=1 SV=1	12	2	21.2	665949	1.81868e+06	0.366171
High	Master Protein	Q62465	Synaptic vesicle membrane protein VAT-1 homolog OS=Mus musculus OX=10090 GN=Vat1 PE=1 SV=3	11	4	43.1	663395	2.29071e+06	0.289603
High	Master Protein	Q3UYC0	Protein phosphatase 1H OS=Mus musculus OX=10090 GN=Ppm1h PE=1 SV=1	7	3	56.3	661879	2.24921e+06	0.294272
High	Master Protein	Q8BYK6	YTH domain-containing family protein 3 OS=Mus musculus OX=10090 GN=Ythdf3 PE=1 SV=2	8	4	63.9	660559	1.71643e+06	0.384846
High	Master Protein	E9QKE4	Rab3 GTPase-activating protein non-catalytic subunit OS=Mus musculus OX=10090 GN=Rab3gap2 PE=1 SV=1	2	3	154.5	659907	1.43774e+06	0.458988
High	Master Protein	P49135	General transcription and DNA repair factor IIH helicase subunit XPB OS=Mus musculus OX=10090 GN=Ercc3 PE=2 SV=1	5	3	89.1	658878	1.6149e+06	0.408
High	Master Protein	Q80U58	Pumilio homolog 2 OS=Mus musculus OX=10090 GN=Pum2 PE=1 SV=2	2	2	114.2	657819	1.97276e+06	0.333451
High	Master Protein	O88543	COP9 signalosome complex subunit 3 OS=Mus musculus OX=10090 GN=Cops3 PE=1 SV=3	10	4	47.8	656833	2.0996e+06	0.312837
High	Master Protein	H3BK01	TAF6-like RNA polymerase II p300/CBP-associated factor-associated factor 65 kDa subunit 6L OS=Mus musculus OX=10090 GN=Taf6l PE=1 SV=1	9	3	67.9	655638	913357	0.717833
High	Master Protein	Q8BM41	Protein LSM14 homolog B OS=Mus musculus OX=10090 GN=Lsm14b PE=1 SV=1	27	9	33.2	655276	2.52156e+06	0.259869
High	Master Protein	Q5EG47	5'-AMP-activated protein kinase catalytic subunit alpha-1 OS=Mus musculus OX=10090 GN=Prkaa1 PE=1 SV=2	6	5	63.9	655264	2.08732e+06	0.313925
High	Master Protein	Q8BRK8	5'-AMP-activated protein kinase catalytic subunit alpha-2 OS=Mus musculus OX=10090 GN=Prkaa2 PE=1 SV=3	5	3	62	654013	1.00497e+06	0.65078
High	Master Protein	A0A1B0GR18	MOB kinase activator 2 OS=Mus musculus OX=10090 GN=Mob2 PE=1 SV=1	7	2	30.2	653094	1.98299e+06	0.329348
High	Master Protein	E9Q481	Serine/threonine-protein phosphatase 4 regulatory subunit 3A OS=Mus musculus OX=10090 GN=Ppp4r3a PE=1 SV=1	11	8	95.3	652523	4.27097e+06	0.152781
High	Master Protein	Q9DB05	Alpha-soluble NSF attachment protein OS=Mus musculus OX=10090 GN=Napa PE=1 SV=1	28	6	33.2	649009	2.34979e+06	0.276199
High	Master Protein	P62245	40S ribosomal protein S15a OS=Mus musculus OX=10090 GN=Rps15a PE=1 SV=2	22	3	14.8	648459	3.34045e+06	0.194123
High	Master Protein	Q8VDQ1	Prostaglandin reductase 2 OS=Mus musculus OX=10090 GN=Ptgr2 PE=1 SV=2	3	2	38	648292	1.79984e+06	0.360194
High	Master Protein	E9QLK7	Transformation/transcription domain-associated protein OS=Mus musculus OX=10090 GN=Trrap PE=1 SV=1	1	3	435.5	645543	1.03326e+06	0.624766
High	Master Protein	Q9R1X4	Protein timeless homolog OS=Mus musculus OX=10090 GN=Timeless PE=1 SV=3	3	4	137.4	643990	1.15792e+06	0.55616
High	Master Protein	Q5SVR0	TBC1 domain family member 9B OS=Mus musculus OX=10090 GN=Tbc1d9b PE=1 SV=1	2	2	141.7	641307	1.12576e+06	0.569667
High	Master Protein	P08030	Adenine phosphoribosyltransferase OS=Mus musculus OX=10090 GN=Aprt PE=1 SV=2	23	3	19.7	636910	1.41193e+06	0.451092
High	Master Protein	Q8R5L1	Complement component 1 Q subcomponent-binding protein, mitochondrial OS=Mus musculus OX=10090 GN=C1qbp PE=1 SV=1	12	2	31	636807	3.02379e+06	0.210598
High	Master Protein	Q9QYA2	Mitochondrial import receptor subunit TOM40 homolog OS=Mus musculus OX=10090 GN=Tomm40 PE=1 SV=3	12	5	37.9	635286	2.39465e+06	0.265294
High	Master Protein	O70439	Syntaxin-7 OS=Mus musculus OX=10090 GN=Stx7 PE=1 SV=3	20	5	29.8	634705	3.67376e+06	0.172767
High	Master Protein	Q9JHS9	Spliceosome-associated protein CWC15 homolog OS=Mus musculus OX=10090 GN=Cwc15 PE=1 SV=1	8	3	26.6	632659	4633966	0.136526
High	Master Protein	Q6A065	Centrosomal protein of 170 kDa OS=Mus musculus OX=10090 GN=Cep170 PE=1 SV=2	4	5	174.9	631808	2.39081e+06	0.264265
High	Master Protein	P56383	ATP synthase F(0) complex subunit C2, mitochondrial OS=Mus musculus OX=10090 GN=Atp5mc2 PE=2 SV=2	21	2	15.5	629497	1.88539e+06	0.333882
High	Master Protein	P51830	Adenylate cyclase type 9 OS=Mus musculus OX=10090 GN=Adcy9 PE=1 SV=1	3	4	150.9	629164	1.20008e+06	0.524267
High	Master Protein	Q9JHE7	Protein TSSC4 OS=Mus musculus OX=10090 GN=Tssc4 PE=1 SV=1	8	4	33.5	627936	1.61749e+06	0.388217
High	Master Protein	Q80X41	Serine/threonine-protein kinase VRK1 OS=Mus musculus OX=10090 GN=Vrk1 PE=1 SV=2	12	4	49.7	626056	4.13366e+06	0.151453
High	Master Protein	Q61823	Programmed cell death protein 4 OS=Mus musculus OX=10090 GN=Pdcd4 PE=1 SV=1	5	4	51.7	625811	616100	1.01576
High	Master Protein	E9PYH2	Cytosolic acyl coenzyme A thioester hydrolase OS=Mus musculus OX=10090 GN=Acot7 PE=1 SV=1	6	3	42.8	624060	2.83738e+06	0.219942
High	Master Protein	Q9JJ78	Lymphokine-activated killer T-cell-originated protein kinase OS=Mus musculus OX=10090 GN=Pbk PE=1 SV=1	11	7	36.7	620790	2.86341e+06	0.216801
High	Master Protein	B9EJ86	Oxysterol-binding protein-related protein 8 OS=Mus musculus OX=10090 GN=Osbpl8 PE=1 SV=1	3	2	101.2	618640	1.10681e+06	0.558939
High	Master Protein	Q8CE50	Sorting nexin-30 OS=Mus musculus OX=10090 GN=Snx30 PE=1 SV=1	8	4	49.5	618521	1.90865e+06	0.324062
High	Master Protein	O35382	Exocyst complex component 4 OS=Mus musculus OX=10090 GN=Exoc4 PE=1 SV=2	7	7	110.5	617386	1.59512e+06	0.387047
High	Master Protein	Q9Z130	Heterogeneous nuclear ribonucleoprotein D-like OS=Mus musculus OX=10090 GN=Hnrnpdl PE=1 SV=1	43	32	33.5	617257	3.82651e+06	0.161311
High	Master Protein	Q9JI39	ATP-binding cassette sub-family B member 10, mitochondrial OS=Mus musculus OX=10090 GN=Abcb10 PE=1 SV=1	7	5	77.1	613713	1.43715e+06	0.427035
High	Master Protein	Q99MJ9	ATP-dependent RNA helicase DDX50 OS=Mus musculus OX=10090 GN=Ddx50 PE=2 SV=1	9	4	82.1	609239	2.12705e+06	0.286425
High	Master Protein	Q8BRG8	Transmembrane protein 209 OS=Mus musculus OX=10090 GN=Tmem209 PE=2 SV=1	10	5	62.9	607629	3835702	0.158414
High	Master Protein	Q3TMP1	General transcription factor IIIC, polypeptide 3 OS=Mus musculus OX=10090 GN=Gtf3c3 PE=1 SV=1	6	5	100.6	606899	1.79014e+06	0.339024
High	Master Protein	Q9D1R2	Protein KTI12 homolog OS=Mus musculus OX=10090 GN=Kti12 PE=1 SV=1	10	4	38.4	606198	2347215	0.258263
High	Master Protein	D3Z230	Type I inositol 3,4-bisphosphate 4-phosphatase OS=Mus musculus OX=10090 GN=Inpp4a PE=1 SV=1	5	4	109.6	605883	1.79457e+06	0.337619
High	Master Protein	K3W4S4	C-Jun-amino-terminal kinase-interacting protein 3 OS=Mus musculus OX=10090 GN=Mapk8ip3 PE=1 SV=1	5	6	148.6	605576	1.1906e+06	0.50863
High	Master Protein	Q9Z2G6	Protein sel-1 homolog 1 OS=Mus musculus OX=10090 GN=Sel1l PE=1 SV=2	6	3	88.3	604828	1.55565e+06	0.388794
High	Master Protein	Q62426	Cystatin-B OS=Mus musculus OX=10090 GN=Cstb PE=1 SV=1	11	2	11	604099	1.44276e+06	0.418712
High	Master Protein	A0A0R4J092	Beta-mannosidase OS=Mus musculus OX=10090 GN=Manba PE=1 SV=1	7	8	100.8	603689	1.95428e+06	0.308906
High	Master Protein	Q9D0S9	Histidine triad nucleotide-binding protein 2, mitochondrial OS=Mus musculus OX=10090 GN=Hint2 PE=1 SV=1	17	3	17.3	603500	1.9489e+06	0.309662
High	Master Protein	A0A087WQ31	CLIP-associating protein 1 OS=Mus musculus OX=10090 GN=Clasp1 PE=1 SV=1	6	7	170.9	601522	2.21086e+06	0.272076
High	Master Protein	Q8CE96	tRNA (adenine(58)-N(1))-methyltransferase non-catalytic subunit TRM6 OS=Mus musculus OX=10090 GN=Trmt6 PE=1 SV=1	7	4	55.5	600754	852744	0.704495
High	Master Protein	A6H8H2	DENN domain-containing protein 4C OS=Mus musculus OX=10090 GN=Dennd4c PE=1 SV=1	1	2	211.3	599690	1.10225e+06	0.544058
High	Master Protein	Q4FZC9	Nesprin-3 OS=Mus musculus OX=10090 GN=Syne3 PE=1 SV=1	3	3	112	598704	733170	0.816596
High	Master Protein	P31324	cAMP-dependent protein kinase type II-beta regulatory subunit OS=Mus musculus OX=10090 GN=Prkar2b PE=1 SV=3	14	6	46.1	597744	2.02597e+06	0.295041
High	Master Protein	Q0VBL3	RNA-binding motif protein 15 OS=Mus musculus OX=10090 GN=Rbm15 PE=1 SV=1	7	7	105.7	597317	2489208	0.239963
High	Master Protein	Q62172	RalA-binding protein 1 OS=Mus musculus OX=10090 GN=Ralbp1 PE=1 SV=4	3	2	75	597103	2377541	0.251143
High	Master Protein	Q9R1Q8	Transgelin-3 OS=Mus musculus OX=10090 GN=Tagln3 PE=1 SV=1	31	10	22.5	596864	2.42451e+06	0.246179
High	Master Protein	G3UW74	Mediator of RNA polymerase II transcription subunit 16 OS=Mus musculus OX=10090 GN=Med16 PE=1 SV=1	5	3	95.4	596270	1.15576e+06	0.515913
High	Master Protein	Q6NV99	HAUS augmin-like complex, subunit 6 OS=Mus musculus OX=10090 GN=Haus6 PE=1 SV=1	7	6	105.5	593071	2.28443e+06	0.259614
High	Master Protein	Q8C266	Ras-related protein Rab-5C OS=Mus musculus OX=10090 GN=Rab5c PE=1 SV=1	16	4	25.3	592696	2.85942e+06	0.207278
High	Master Protein	Q8BHF7	CDP-diacylglycerol--glycerol-3-phosphate 3-phosphatidyltransferase, mitochondrial OS=Mus musculus OX=10090 GN=Pgs1 PE=1 SV=1	4	3	62.5	586369	1.173e+06	0.499888
High	Master Protein	O88939	Zinc finger and BTB domain-containing protein 7A OS=Mus musculus OX=10090 GN=Zbtb7a PE=1 SV=2	7	4	60.2	586142	1.4052e+06	0.417123
High	Master Protein	V9GXM1	ADP-ribosylation factor GTPase-activating protein 1 OS=Mus musculus OX=10090 GN=Arfgap1 PE=1 SV=1	12	5	46.5	583626	2.62552e+06	0.22229
High	Master Protein	P05480	Neuronal proto-oncogene tyrosine-protein kinase Src OS=Mus musculus OX=10090 GN=Src PE=1 SV=4	6	4	60.6	581984	1.0842e+06	0.536787
High	Master Protein	Q80VP0	Tectonin beta-propeller repeat-containing protein 1 OS=Mus musculus OX=10090 GN=Tecpr1 PE=1 SV=1	3	4	130.2	581689	1.27397e+06	0.456594
High	Master Protein	Q9DAW6	U4/U6 small nuclear ribonucleoprotein Prp4 OS=Mus musculus OX=10090 GN=Prpf4 PE=1 SV=1	9	3	58.3	580142	2.73945e+06	0.211774
High	Master Protein	Q9DBB4	N-alpha-acetyltransferase 16, NatA auxiliary subunit OS=Mus musculus OX=10090 GN=Naa16 PE=2 SV=1	9	9	101.2	579814	3.05103e+06	0.190039
High	Master Protein	Q8BM39	Pre-mRNA-splicing factor 18 OS=Mus musculus OX=10090 GN=Prpf18 PE=1 SV=1	12	5	39.9	579541	3.13702e+06	0.184743
High	Master Protein	Q9JHS4	ATP-dependent Clp protease ATP-binding subunit clpX-like, mitochondrial OS=Mus musculus OX=10090 GN=Clpx PE=1 SV=2	4	3	69.2	576906	1.65679e+06	0.348206
High	Master Protein	Q80VQ0	Aldehyde dehydrogenase family 3 member B1 OS=Mus musculus OX=10090 GN=Aldh3b1 PE=1 SV=1	13	6	52.3	573017	2.17799e+06	0.263095
High	Master Protein	J3QNK8	Abl interactor 1 OS=Mus musculus OX=10090 GN=Abi1 PE=1 SV=1	10	5	52.3	571564	2.51014e+06	0.227702
High	Master Protein	O88531	Palmitoyl-protein thioesterase 1 OS=Mus musculus OX=10090 GN=Ppt1 PE=1 SV=2	5	2	34.5	570674	1.41845e+06	0.402322
High	Master Protein	O55142	60S ribosomal protein L35a OS=Mus musculus OX=10090 GN=Rpl35a PE=1 SV=2	17	2	12.5	570445	1.84725e+06	0.308808
High	Master Protein	Q8C2E7	WASH complex subunit 5 OS=Mus musculus OX=10090 GN=Washc5 PE=1 SV=2	2	3	134	566870	1.53908e+06	0.368317
High	Master Protein	Q8CCP0	Nuclear export mediator factor Nemf OS=Mus musculus OX=10090 GN=Nemf PE=1 SV=2	4	4	121.1	564848	3.99813e+06	0.141278
High	Master Protein	O35684	Neuroserpin OS=Mus musculus OX=10090 GN=Serpini1 PE=1 SV=1	7	4	46.3	563975	1.27208e+06	0.443349
High	Master Protein	Q7TSI3	Serine/threonine-protein phosphatase 6 regulatory subunit 1 OS=Mus musculus OX=10090 GN=Ppp6r1 PE=1 SV=1	9	5	94.5	563867	2.47029e+06	0.228259
High	Master Protein	P41241	Tyrosine-protein kinase CSK OS=Mus musculus OX=10090 GN=Csk PE=1 SV=2	7	4	50.7	563319	1.45884e+06	0.386141
High	Master Protein	A0A1W2P711	Melanoma inhibitory activity protein 2 OS=Mus musculus OX=10090 GN=Mia2 PE=1 SV=2	4	5	156.5	562660	1.43919e+06	0.390955
High	Master Protein	Q542V3	Serine/arginine-rich-splicing factor 4 OS=Mus musculus OX=10090 GN=Srsf4 PE=1 SV=1	10	8	56.2	562501	3.3229e+06	0.16928
High	Master Protein	Q9CWY8	Ribonuclease H2 subunit A OS=Mus musculus OX=10090 GN=Rnaseh2a PE=1 SV=2	15	5	33.5	562340	2.83337e+06	0.19847
High	Master Protein	V9GX43	CUGBP Elav-like family member 2 (Fragment) OS=Mus musculus OX=10090 GN=Celf2 PE=1 SV=1	14	7	46.8	561581	2.49417e+06	0.225158
High	Master Protein	P09671	Superoxide dismutase [Mn], mitochondrial OS=Mus musculus OX=10090 GN=Sod2 PE=1 SV=3	6	2	24.6	561282	2.10668e+06	0.266429
High	Master Protein	O54950	5'-AMP-activated protein kinase subunit gamma-1 OS=Mus musculus OX=10090 GN=Prkag1 PE=1 SV=2	12	3	37.5	559642	1.9627e+06	0.285138
High	Master Protein	Q8K0V4	CCR4-NOT transcription complex subunit 3 OS=Mus musculus OX=10090 GN=Cnot3 PE=1 SV=1	4	2	81.9	559134	1430418	0.390888
High	Master Protein	Q505K2	Protein FAM160A1 OS=Mus musculus OX=10090 GN=Fam160a1 PE=1 SV=2	3	3	120.1	555811	821672	0.676439
High	Master Protein	Q8BKR5	Protein phosphatase 1 regulatory subunit 37 OS=Mus musculus OX=10090 GN=Ppp1r37 PE=1 SV=1	4	3	77.5	555361	412937	1.3449
High	Master Protein	Q6ZPJ3	(E3-independent) E2 ubiquitin-conjugating enzyme UBE2O OS=Mus musculus OX=10090 GN=Ube2o PE=1 SV=3	5	4	140.7	554815	1.57156e+06	0.353035
High	Master Protein	Q8BXZ1	Protein disulfide-isomerase TMX3 OS=Mus musculus OX=10090 GN=Tmx3 PE=1 SV=2	17	7	51.8	554737	2.36974e+06	0.234092
High	Master Protein	Q6NXI6	Regulation of nuclear pre-mRNA domain-containing protein 2 OS=Mus musculus OX=10090 GN=Rprd2 PE=1 SV=1	7	6	156.5	552822	2.67778e+06	0.206447
High	Master Protein	A0A0R4IZY9	tRNA-dihydrouridine(47) synthase [NAD(P)(+)] OS=Mus musculus OX=10090 GN=Dus3l PE=1 SV=1	5	3	71.1	552747	1.62749e+06	0.339632
High	Master Protein	B1AUN2	Eukaryotic translation initiation factor 2B, subunit 3 OS=Mus musculus OX=10090 GN=Eif2b3 PE=1 SV=1	4	3	50.5	552483	1.53353e+06	0.360269
High	Master Protein	P70419	Polypeptide N-acetylgalactosaminyltransferase 3 OS=Mus musculus OX=10090 GN=Galnt3 PE=1 SV=3	4	3	72.9	548284	2.31618e+06	0.236719
High	Master Protein	J3QN31	Adenylosuccinate synthetase isozyme 1 OS=Mus musculus OX=10090 GN=Adssl1 PE=1 SV=1	5	2	52.7	548087	1.34472e+06	0.407584
High	Master Protein	E9PY58	Caseinolytic peptidase B protein homolog OS=Mus musculus OX=10090 GN=Clpb PE=1 SV=1	6	4	79.5	547610	2.50729e+06	0.218407
High	Master Protein	Q80U93	Nuclear pore complex protein Nup214 OS=Mus musculus OX=10090 GN=Nup214 PE=1 SV=2	3	4	212.8	546289	2.2931e+06	0.238232
High	Master Protein	A0A087WQS2	Basic leucine zipper and W2 domain-containing protein 1 OS=Mus musculus OX=10090 GN=Bzw1 PE=1 SV=1	10	5	51.2	545959	3.92017e+06	0.139269
High	Master Protein	Q8BI84	Transport and Golgi organization protein 1 homolog OS=Mus musculus OX=10090 GN=Mia3 PE=1 SV=2	2	3	213.5	545533	1.52557e+06	0.357592
High	Master Protein	P70441	Na(+)/H(+) exchange regulatory cofactor NHE-RF1 OS=Mus musculus OX=10090 GN=Slc9a3r1 PE=1 SV=3	13	3	38.6	545437	2.26895e+06	0.240391
High	Master Protein	Q80WJ7	Protein LYRIC OS=Mus musculus OX=10090 GN=Mtdh PE=1 SV=1	18	6	63.8	544363	3.99181e+06	0.13637
High	Master Protein	Q9CZ83	39S ribosomal protein L55, mitochondrial OS=Mus musculus OX=10090 GN=Mrpl55 PE=1 SV=1	18	3	15.1	542927	3.14257e+06	0.172765
High	Master Protein	P62960	Nuclease-sensitive element-binding protein 1 OS=Mus musculus OX=10090 GN=Ybx1 PE=1 SV=3	43	7	35.7	541370	6.7604e+06	0.0800796
High	Master Protein	A0A0A6YXH3	Oxysterol-binding protein OS=Mus musculus OX=10090 GN=Osbpl9 PE=1 SV=1	1	2	84.1	539965	1305735	0.413534
High	Master Protein	Q8JZM4	Delta and Notch-like epidermal growth factor-related receptor OS=Mus musculus OX=10090 GN=Dner PE=1 SV=1	7	3	78.7	538677	912283	0.590472
High	Master Protein	Q9WTI7	Unconventional myosin-Ic OS=Mus musculus OX=10090 GN=Myo1c PE=1 SV=2	4	3	121.9	537804	1.4173e+06	0.379457
High	Master Protein	Q91VL8	Telomeric repeat-binding factor 2-interacting protein 1 OS=Mus musculus OX=10090 GN=Terf2ip PE=1 SV=1	22	7	43.3	537103	2.45699e+06	0.218602
High	Master Protein	Q6P4T3	Eyes absent homolog OS=Mus musculus OX=10090 GN=Eya3 PE=1 SV=1	11	6	57.8	537003	2.25827e+06	0.237794
High	Master Protein	Q9JKN6	RNA-binding protein Nova-1 OS=Mus musculus OX=10090 GN=Nova1 PE=1 SV=2	9	3	51.7	536668	1.79193e+06	0.299491
High	Master Protein	Q91W90	Thioredoxin domain-containing protein 5 OS=Mus musculus OX=10090 GN=Txndc5 PE=1 SV=2	16	6	46.4	536164	2.1837e+06	0.24553
High	Master Protein	Q8C754	Vacuolar protein sorting-associated protein 52 homolog OS=Mus musculus OX=10090 GN=Vps52 PE=1 SV=1	5	3	82	535893	1.32268e+06	0.405156
High	Master Protein	Q9D6T0	Nitric oxide synthase-interacting protein OS=Mus musculus OX=10090 GN=Nosip PE=1 SV=1	7	3	33.2	535464	1.315e+06	0.407197
High	Master Protein	Q5SWD9	Pre-rRNA-processing protein TSR1 homolog OS=Mus musculus OX=10090 GN=Tsr1 PE=1 SV=1	2	3	92	535194	1.42588e+06	0.375343
High	Master Protein	Q8VEA4	Mitochondrial intermembrane space import and assembly protein 40 OS=Mus musculus OX=10090 GN=Chchd4 PE=1 SV=1	20	2	15.5	534914	1.43825e+06	0.371919
High	Master Protein	P59016	Vacuolar protein sorting-associated protein 33B OS=Mus musculus OX=10090 GN=Vps33b PE=1 SV=1	4	2	70.5	533170	1.55881e+06	0.342036
High	Master Protein	P08752	Guanine nucleotide-binding protein G(i) subunit alpha-2 OS=Mus musculus OX=10090 GN=Gnai2 PE=1 SV=5	19	7	40.5	530266	1.37344e+06	0.386087
High	Master Protein	A0A0B4J1E2	SNW domain-containing protein 1 OS=Mus musculus OX=10090 GN=Snw1 PE=1 SV=1	14	6	61.4	530134	2.65841e+06	0.199418
High	Master Protein	Q3URD3	Sarcolemmal membrane-associated protein OS=Mus musculus OX=10090 GN=Slmap PE=1 SV=2	4	3	96.9	529744	1.30133e+06	0.407078
High	Master Protein	A0A2I3BQ07	Serine/threonine-protein phosphatase 6 regulatory ankyrin repeat subunit A OS=Mus musculus OX=10090 GN=Ankrd28 PE=1 SV=1	3	3	116	528728	1.47584e+06	0.358256
High	Master Protein	Q9JIH2	Nuclear pore complex protein Nup50 OS=Mus musculus OX=10090 GN=Nup50 PE=1 SV=3	22	7	49.5	527575	3.95967e+06	0.133237
High	Master Protein	G5E8G0	Heterogeneous nuclear ribonucleoprotein D, isoform CRA_b OS=Mus musculus OX=10090 GN=Hnrnpd PE=1 SV=1	51	38	30.6	526298	2.26477e+06	0.232385
High	Master Protein	Q61686	Chromobox protein homolog 5 OS=Mus musculus OX=10090 GN=Cbx5 PE=1 SV=1	20	3	22.2	524599	6.18909e+06	0.084762
High	Master Protein	P63154	Crooked neck-like protein 1 OS=Mus musculus OX=10090 GN=Crnkl1 PE=1 SV=1	5	4	83.4	524408	1.38103e+06	0.379722
High	Master Protein	A2A5S3	Double-stranded RNA-binding protein Staufen homolog 1 OS=Mus musculus OX=10090 GN=Stau1 PE=1 SV=1	10	4	54.8	522500	4.49191e+06	0.11632
High	Master Protein	Q8BTT6	Digestive organ expansion factor homolog OS=Mus musculus OX=10090 GN=Diexf PE=2 SV=2	3	5	88.8	521478	1.32448e+06	0.393721
High	Master Protein	Q8R0H9	ADP-ribosylation factor-binding protein GGA1 OS=Mus musculus OX=10090 GN=Gga1 PE=1 SV=1	20	7	69.9	519204	7.04604e+06	0.0736874
High	Master Protein	Q91Z67	SLIT-ROBO Rho GTPase-activating protein 2 OS=Mus musculus OX=10090 GN=Srgap2 PE=1 SV=2	6	5	120.7	519123	2.02687e+06	0.256121
High	Master Protein	P61290	Proteasome activator complex subunit 3 OS=Mus musculus OX=10090 GN=Psme3 PE=1 SV=1	9	2	29.5	518578	1.0934e+06	0.47428
High	Master Protein	A0A1D5RLQ9	Non-specific serine/threonine protein kinase OS=Mus musculus OX=10090 GN=Cdc42bpa PE=1 SV=1	5	8	198.5	515258	2.17435e+06	0.236971
High	Master Protein	E9Q035	Predicted gene 20425 OS=Mus musculus OX=10090 GN=Gm20425 PE=4 SV=1	4	5	107.7	514247	2.55635e+06	0.201165
High	Master Protein	Q6PIP5	NudC domain-containing protein 1 OS=Mus musculus OX=10090 GN=Nudcd1 PE=1 SV=2	6	3	66.7	513972	1065620	0.482322
High	Master Protein	G3UWQ7	Protein regulator of cytokinesis 1 OS=Mus musculus OX=10090 GN=Prc1 PE=1 SV=1	9	5	72	509959	3.41183e+06	0.149468
High	Master Protein	P35585	AP-1 complex subunit mu-1 OS=Mus musculus OX=10090 GN=Ap1m1 PE=1 SV=3	15	6	48.5	508433	3.44446e+06	0.147609
High	Master Protein	Q9CQ88	Tetraspanin-31 OS=Mus musculus OX=10090 GN=Tspan31 PE=1 SV=1	6	2	22.7	504686	417024	1.21021
High	Master Protein	Q80TM9	Nischarin OS=Mus musculus OX=10090 GN=Nisch PE=1 SV=2	3	3	174.9	504368	191221	2.63762
High	Master Protein	Q8K0S2	Glutamate-rich protein 5 OS=Mus musculus OX=10090 GN=Erich5 PE=1 SV=1	11	4	38.5	503759	1.45072e+06	0.347246
High	Master Protein	Q8JZN7	Mitochondrial Rho GTPase 2 OS=Mus musculus OX=10090 GN=Rhot2 PE=1 SV=1	3	4	69	502477	944583	0.531956
High	Master Protein	Q9R0U0	Serine/arginine-rich splicing factor 10 OS=Mus musculus OX=10090 GN=Srsf10 PE=1 SV=2	5	2	31.3	501601	1521192	0.329742
High	Master Protein	E9QM73	Serine/threonine-protein kinase WNK2 OS=Mus musculus OX=10090 GN=Wnk2 PE=1 SV=1	5	12	233.9	499430	2.04276e+06	0.244487
High	Master Protein	G3UZR1	Tubulin beta-5 chain (Fragment) OS=Mus musculus OX=10090 GN=Tubb5 PE=1 SV=8	92	41	7.2	493889		#VALUE!
High	Master Protein	S4R1W1	Glyceraldehyde-3-phosphate dehydrogenase OS=Mus musculus OX=10090 GN=Gm3839 PE=1 SV=1	76	350	35.8	493369	229484	2.14991
High	Master Protein	H3BKH6	S-formylglutathione hydrolase OS=Mus musculus OX=10090 GN=Esd PE=1 SV=1	7	2	32.8	492248	1.22398e+06	0.402169
High	Master Protein	Q64010	Adapter molecule crk OS=Mus musculus OX=10090 GN=Crk PE=1 SV=1	18	4	33.8	491510	1.82996e+06	0.26859
High	Master Protein	P11031	Activated RNA polymerase II transcriptional coactivator p15 OS=Mus musculus OX=10090 GN=Sub1 PE=1 SV=3	9	2	14.4	491334	7.00705e+06	0.07012
High	Master Protein	Q921T2	Torsin-1A-interacting protein 1 OS=Mus musculus OX=10090 GN=Tor1aip1 PE=1 SV=3	13	4	66.7	489335	2.04667e+06	0.239089
High	Master Protein	P97411	Islet cell autoantigen 1 OS=Mus musculus OX=10090 GN=Ica1 PE=1 SV=3	5	3	54.3	488086	1.46487e+06	0.333194
High	Master Protein	Q3U3J1	2-oxoisovalerate dehydrogenase subunit alpha OS=Mus musculus OX=10090 GN=Bckdha PE=1 SV=1	13	3	50.7	487975	2.28574e+06	0.213487
High	Master Protein	Q8BVI4	Dihydropteridine reductase OS=Mus musculus OX=10090 GN=Qdpr PE=1 SV=2	12	2	25.6	487449	1.88519e+06	0.258567
High	Master Protein	Q3U3M5	Cyclin-K OS=Mus musculus OX=10090 GN=Ccnk PE=1 SV=1	5	2	64.3	486621	2.31212e+06	0.210465
High	Master Protein	A2AUD5	Tumor protein D54 OS=Mus musculus OX=10090 GN=Tpd52l2 PE=1 SV=1	28	6	25.1	485422	2.35064e+06	0.206506
High	Master Protein	Q6PE54	Probable ATP-dependent RNA helicase DHX40 OS=Mus musculus OX=10090 GN=Dhx40 PE=1 SV=1	3	3	88.5	485029	1.14756e+06	0.422662
High	Master Protein	Q8BIZ6	Smad nuclear-interacting protein 1 OS=Mus musculus OX=10090 GN=Snip1 PE=1 SV=1	13	4	44.4	484623	2.8489e+06	0.170109
High	Master Protein	Q99J09	Methylosome protein 50 OS=Mus musculus OX=10090 GN=Wdr77 PE=1 SV=1	6	2	36.9	483965	1.52157e+06	0.318071
High	Master Protein	Q3UMB9	WASH complex subunit 4 OS=Mus musculus OX=10090 GN=Washc4 PE=1 SV=2	2	2	136.3	482382	615308	0.783968
High	Master Protein	Q80Y44	Probable ATP-dependent RNA helicase DDX10 OS=Mus musculus OX=10090 GN=Ddx10 PE=1 SV=2	4	3	100.7	482066	622674	0.774187
High	Master Protein	P24668	Cation-dependent mannose-6-phosphate receptor OS=Mus musculus OX=10090 GN=M6pr PE=1 SV=1	15	4	31.2	481916	1.40401e+06	0.343243
High	Master Protein	Q3UFY7	7-methylguanosine phosphate-specific 5'-nucleotidase OS=Mus musculus OX=10090 GN=Nt5c3b PE=1 SV=3	16	4	34.4	480430	1.74241e+06	0.275728
High	Master Protein	Q61124	Battenin OS=Mus musculus OX=10090 GN=Cln3 PE=1 SV=2	3	2	47.6	479496	612646	0.782664
High	Master Protein	P48774	Glutathione S-transferase Mu 5 OS=Mus musculus OX=10090 GN=Gstm5 PE=1 SV=1	4	2	26.6	475932	813570	0.584992
High	Master Protein	Q8R332	Nucleoporin p58/p45 OS=Mus musculus OX=10090 GN=Nup58 PE=1 SV=1	6	5	59.4	474565	1.50033e+06	0.316306
High	Master Protein	Q3TLH4	Protein PRRC2C OS=Mus musculus OX=10090 GN=Prrc2c PE=1 SV=3	3	5	310.7	474493	2.35761e+06	0.20126
High	Master Protein	Q8BUL6	Pleckstrin homology domain-containing family A member 1 OS=Mus musculus OX=10090 GN=Plekha1 PE=1 SV=1	6	4	43.3	474024	1.34376e+06	0.352759
High	Master Protein	F2Z3U3	Ras association (RalGDS/AF-6) and pleckstrin homology domains 1 OS=Mus musculus OX=10090 GN=Raph1 PE=1 SV=2	3	3	136.7	474012	2.08999e+06	0.2268
High	Master Protein	E9Q3L2	Phosphatidylinositol 4-kinase alpha OS=Mus musculus OX=10090 GN=Pi4ka PE=1 SV=2	1	2	236.9	473478	888492	0.532901
High	Master Protein	Q8R409	Protein HEXIM1 OS=Mus musculus OX=10090 GN=Hexim1 PE=1 SV=1	16	4	40.2	470243	3.52807e+06	0.133286
High	Master Protein	Q9JJD0	THAP domain-containing protein 11 OS=Mus musculus OX=10090 GN=Thap11 PE=1 SV=1	11	4	33.3	469481	2.12809e+06	0.220611
High	Master Protein	P47754	F-actin-capping protein subunit alpha-2 OS=Mus musculus OX=10090 GN=Capza2 PE=1 SV=3	25	6	32.9	469082	2.08325e+06	0.225168
High	Master Protein	Q8BJL1	F-box only protein 30 OS=Mus musculus OX=10090 GN=Fbxo30 PE=1 SV=2	5	5	82.6	468709	1.29488e+06	0.36197
High	Master Protein	Q8BFW7	Lipoma-preferred partner homolog OS=Mus musculus OX=10090 GN=Lpp PE=1 SV=1	16	8	65.8	468617	3.18943e+06	0.146928
High	Master Protein	Q9CZW4	Long-chain-fatty-acid--CoA ligase 3 OS=Mus musculus OX=10090 GN=Acsl3 PE=1 SV=2	7	6	80.4	468583	1.70998e+06	0.274029
High	Master Protein	Q8BHK9	DNA excision repair protein ERCC-6-like OS=Mus musculus OX=10090 GN=Ercc6l PE=1 SV=1	5	5	138.8	467543	1.56958e+06	0.297879
High	Master Protein	P35550	rRNA 2'-O-methyltransferase fibrillarin OS=Mus musculus OX=10090 GN=Fbl PE=1 SV=2	7	2	34.3	467165	3.07091e+06	0.152126
High	Master Protein	F6QM56	Acid trehalase-like protein 1 OS=Mus musculus OX=10090 GN=Pgghg PE=1 SV=2	6	4	77.4	465613	1.83524e+06	0.253707
High	Master Protein	A0A1W2P6X9	Bromodomain adjacent to zinc finger domain protein 2A OS=Mus musculus OX=10090 GN=Baz2a PE=1 SV=1	1	2	209.6	463233	872171	0.531127
High	Master Protein	G3X9K3	Brefeldin A-inhibited guanine nucleotide-exchange protein 1 OS=Mus musculus OX=10090 GN=Arfgef1 PE=1 SV=1	5	11	208.4	460869	1.91062e+06	0.241215
High	Master Protein	P43275	Histone H1.1 OS=Mus musculus OX=10090 GN=Hist1h1a PE=1 SV=2	19	6	21.8	460744	4.49453e+06	0.102512
High	Master Protein	Q61409	cGMP-inhibited 3',5'-cyclic phosphodiesterase B OS=Mus musculus OX=10090 GN=Pde3b PE=1 SV=2	3	3	122.1	460552	1.05999e+06	0.434486
High	Master Protein	P45952	Medium-chain specific acyl-CoA dehydrogenase, mitochondrial OS=Mus musculus OX=10090 GN=Acadm PE=1 SV=1	16	5	46.5	460179	2.97365e+06	0.154752
High	Master Protein	Q3KNK3	NADH-cytochrome b5 reductase 2 OS=Mus musculus OX=10090 GN=Cyb5r2 PE=2 SV=2	13	4	31.3	458791	1.66651e+06	0.275301
High	Master Protein	Q9CYA6	Zinc finger CCHC domain-containing protein 8 OS=Mus musculus OX=10090 GN=Zcchc8 PE=1 SV=3	14	5	78	455553	2.27081e+06	0.200613
High	Master Protein	Q8BGT5	Alanine aminotransferase 2 OS=Mus musculus OX=10090 GN=Gpt2 PE=1 SV=1	2	2	57.9	455364	948584	0.480046
High	Master Protein	P70451	Tyrosine-protein kinase Fer OS=Mus musculus OX=10090 GN=Fer PE=1 SV=2	3	2	94.5	455363	1.49624e+06	0.304338
High	Master Protein	P61759	Prefoldin subunit 3 OS=Mus musculus OX=10090 GN=Vbp1 PE=1 SV=2	10	2	22.4	454003	1.10491e+06	0.410895
High	Master Protein	E9Q9M1	Cytosolic purine 5'-nucleotidase OS=Mus musculus OX=10090 GN=Nt5c2 PE=1 SV=1	3	3	67.7	452760	1.90094e+06	0.238177
High	Master Protein	Q78JE5	F-box only protein 22 OS=Mus musculus OX=10090 GN=Fbxo22 PE=1 SV=2	6	2	44.2	452348	1.50517e+06	0.300529
High	Master Protein	Q6NTA4	Ras-related GTP-binding protein B OS=Mus musculus OX=10090 GN=Rragb PE=1 SV=1	3	2	43.2	451577	1.0615e+06	0.425413
High	Master Protein	Q8BZM1	Glomulin OS=Mus musculus OX=10090 GN=Glmn PE=1 SV=1	4	3	67.7	451362	563659	0.800772
High	Master Protein	Q8BND5	Sulfhydryl oxidase 1 OS=Mus musculus OX=10090 GN=Qsox1 PE=1 SV=1	1	2	82.7	451352	1.03645e+06	0.43548
High	Master Protein	Q8K284	General transcription factor 3C polypeptide 1 OS=Mus musculus OX=10090 GN=Gtf3c1 PE=1 SV=2	3	4	237.3	451234	1.29745e+06	0.347785
High	Master Protein	Q8C6L5	Cyclic GMP-AMP synthase OS=Mus musculus OX=10090 GN=Cgas PE=1 SV=1	9	4	58.2	451171	3.37983e+06	0.133489
High	Master Protein	Q9QYJ3	DnaJ homolog subfamily B member 1 OS=Mus musculus OX=10090 GN=Dnajb1 PE=1 SV=3	11	3	38.1	450653	847798	0.531557
High	Master Protein	Q9WTL2	Ras-related protein Rab-25 OS=Mus musculus OX=10090 GN=Rab25 PE=1 SV=2	15	2	23.5	448962	1.07389e+06	0.418069
High	Master Protein	A0A2I3BRM6	Heterogeneous nuclear ribonucleoproteins C1/C2 (Fragment) OS=Mus musculus OX=10090 GN=Hnrnpc PE=1 SV=1	65	22	12.8	447533	2.1045e+06	0.212655
High	Master Protein	P01899	H-2 class I histocompatibility antigen, D-B alpha chain OS=Mus musculus OX=10090 GN=H2-D1 PE=1 SV=2	14	4	40.8	446673	3.14596e+06	0.141983
High	Master Protein	P10605	Cathepsin B OS=Mus musculus OX=10090 GN=Ctsb PE=1 SV=2	9	3	37.3	445823	1.68955e+06	0.263871
High	Master Protein	Q6PCM2	Integrator complex subunit 6 OS=Mus musculus OX=10090 GN=Ints6 PE=1 SV=1	2	2	99.6	442257	588008	0.752126
High	Master Protein	Q8JZU2	Tricarboxylate transport protein, mitochondrial OS=Mus musculus OX=10090 GN=Slc25a1 PE=1 SV=1	7	3	33.9	442161	1.55589e+06	0.284184
High	Master Protein	Q8R3G1	Nuclear inhibitor of protein phosphatase 1 OS=Mus musculus OX=10090 GN=Ppp1r8 PE=1 SV=1	18	5	38.5	442066	4.72556e+06	0.0935478
High	Master Protein	G3X977	Inter-alpha trypsin inhibitor, heavy chain 2 OS=Mus musculus OX=10090 GN=Itih2 PE=1 SV=1	2	2	106.3	441000	1.56956e+06	0.28097
High	Master Protein	Q80TJ7	Histone lysine demethylase PHF8 OS=Mus musculus OX=10090 GN=Phf8 PE=1 SV=2	3	2	113.5	439580	1.55808e+06	0.282129
High	Master Protein	P63087	Serine/threonine-protein phosphatase PP1-gamma catalytic subunit OS=Mus musculus OX=10090 GN=Ppp1cc PE=1 SV=1	27	10	37	439461	1.36392e+06	0.322204
High	Master Protein	Q6PEV3	WAS/WASL-interacting protein family member 2 OS=Mus musculus OX=10090 GN=Wipf2 PE=1 SV=1	9	3	46.3	438911	2.20509e+06	0.199045
High	Master Protein	Q9ES28	Rho guanine nucleotide exchange factor 7 OS=Mus musculus OX=10090 GN=Arhgef7 PE=1 SV=2	14	9	97	436597	4.09152e+06	0.106708
High	Master Protein	Q80U70	Polycomb protein Suz12 OS=Mus musculus OX=10090 GN=Suz12 PE=1 SV=2	13	6	83	435650	4.175e+06	0.104347
High	Master Protein	Q8BG15	CTD small phosphatase-like protein 2 OS=Mus musculus OX=10090 GN=Ctdspl2 PE=1 SV=1	6	3	52.8	432446	2.09421e+06	0.206496
High	Master Protein	D3Z6Q3	Forkhead box protein P1 OS=Mus musculus OX=10090 GN=Foxp1 PE=1 SV=1	8	5	78.9	432008	1.91974e+06	0.225035
High	Master Protein	Q9D9K3	Cell death regulator Aven OS=Mus musculus OX=10090 GN=Aven PE=1 SV=2	7	2	37.2	431518	733890	0.587988
High	Master Protein	Q9CQW1	Synaptobrevin homolog YKT6 OS=Mus musculus OX=10090 GN=Ykt6 PE=1 SV=1	13	3	22.3	431444	970547	0.444537
High	Master Protein	B1AVH5	Coronin OS=Mus musculus OX=10090 GN=Coro2a PE=1 SV=1	7	4	61.7	430168	1909061	0.22533
High	Master Protein	P97863	Nuclear factor 1 B-type OS=Mus musculus OX=10090 GN=Nfib PE=1 SV=2	4	2	63.5	430092	1.41631e+06	0.30367
High	Master Protein	Q8VEJ9	Vacuolar protein sorting-associated protein 4A OS=Mus musculus OX=10090 GN=Vps4a PE=1 SV=1	12	9	48.9	429634	1.32106e+06	0.325219
High	Master Protein	Q9D5V6	Synapse-associated protein 1 OS=Mus musculus OX=10090 GN=Syap1 PE=1 SV=1	24	5	41.3	429232	2.57436e+06	0.166734
High	Master Protein	Q3UM18	Large subunit GTPase 1 homolog OS=Mus musculus OX=10090 GN=Lsg1 PE=1 SV=2	8	4	73.1	428534	1.85978e+06	0.230422
High	Master Protein	P60766	Cell division control protein 42 homolog OS=Mus musculus OX=10090 GN=Cdc42 PE=1 SV=2	15	3	21.2	428270	2.19778e+06	0.194864
High	Master Protein	Q6P9R1	ATP-dependent RNA helicase DDX51 OS=Mus musculus OX=10090 GN=Ddx51 PE=1 SV=1	6	2	70.3	427995		#VALUE!
High	Master Protein	Q6ZWV7	60S ribosomal protein L35 OS=Mus musculus OX=10090 GN=Rpl35 PE=1 SV=1	19	2	14.5	427982	4.81838e+06	0.0888228
High	Master Protein	A2A654	Bromodomain PHD finger transcription factor OS=Mus musculus OX=10090 GN=Bptf PE=1 SV=1	2	6	333	426713	2.35826e+06	0.180944
High	Master Protein	Q91W89	Alpha-mannosidase 2C1 OS=Mus musculus OX=10090 GN=Man2c1 PE=1 SV=1	3	4	115.6	425870	1.27999e+06	0.332713
High	Master Protein	A0A0A6YX26	60S ribosomal protein L31 OS=Mus musculus OX=10090 GN=Rpl31 PE=1 SV=1	18	2	15	425108	3.69035e+06	0.115195
High	Master Protein	Q5SSZ5	Tensin-3 OS=Mus musculus OX=10090 GN=Tns3 PE=1 SV=1	7	5	155.5	425084	967552	0.43934
High	Master Protein	E9QPR5	Serine/threonine-protein phosphatase 4 regulatory subunit 1 OS=Mus musculus OX=10090 GN=Ppp4r1 PE=1 SV=1	4	4	106.3	423996	827670	0.512277
High	Master Protein	Q9QUI0	Transforming protein RhoA OS=Mus musculus OX=10090 GN=Rhoa PE=1 SV=1	11	2	21.8	423128	652087	0.648883
High	Master Protein	Q91XU3	Phosphatidylinositol 5-phosphate 4-kinase type-2 gamma OS=Mus musculus OX=10090 GN=Pip4k2c PE=1 SV=1	5	2	47.3	422719	1.14281e+06	0.369895
High	Master Protein	Q8BFY6	Peflin OS=Mus musculus OX=10090 GN=Pef1 PE=1 SV=1	9	3	29.2	422080	1.27704e+06	0.330514
High	Master Protein	Q8BFP9	[Pyruvate dehydrogenase (acetyl-transferring)] kinase isozyme 1, mitochondrial OS=Mus musculus OX=10090 GN=Pdk1 PE=1 SV=2	6	2	49	421342	896067	0.470212
High	Master Protein	Q5SWT3	Solute carrier family 25 member 35 OS=Mus musculus OX=10090 GN=Slc25a35 PE=1 SV=2	3	2	32.6	421321	755908	0.557372
High	Master Protein	Q5SSW2	Proteasome activator complex subunit 4 OS=Mus musculus OX=10090 GN=Psme4 PE=1 SV=1	3	5	211.1	421001	2.32984e+06	0.180699
High	Master Protein	P63085	Mitogen-activated protein kinase 1 OS=Mus musculus OX=10090 GN=Mapk1 PE=1 SV=3	22	7	41.2	420711	1.28374e+06	0.327723
High	Master Protein	Q80YY7	Zinc finger protein 618 OS=Mus musculus OX=10090 GN=Znf618 PE=2 SV=3	1	2	104.8	419648		#VALUE!
High	Master Protein	S0DHL8	Capping protein, Arp2/3 and myosin-I linker protein 2 OS=Mus musculus OX=10090 GN=Carmil2 PE=1 SV=1	3	4	151.7	418295	1.46593e+06	0.285345
High	Master Protein	A3KGB4	TBC1 domain family member 8B OS=Mus musculus OX=10090 GN=Tbc1d8b PE=1 SV=1	4	4	127.8	418034	682535	0.612473
High	Master Protein	Q69ZA1	Cyclin-dependent kinase 13 OS=Mus musculus OX=10090 GN=Cdk13 PE=1 SV=3	4	6	164.5	417914	1.65472e+06	0.252558
High	Master Protein	Q60960	Importin subunit alpha-5 OS=Mus musculus OX=10090 GN=Kpna1 PE=1 SV=2	9	3	60.1	417606	803253	0.519894
High	Master Protein	Q6NZF1	Zinc finger CCCH domain-containing protein 11A OS=Mus musculus OX=10090 GN=Zc3h11a PE=1 SV=1	19	10	86.4	417469	4.54217e+06	0.0919098
Medium	Master Protein	Q9WV34	MAGUK p55 subfamily member 2 OS=Mus musculus OX=10090 GN=Mpp2 PE=1 SV=1	1	2	61.5	417406	968828	0.430836
High	Master Protein	Q61151	Serine/threonine-protein phosphatase 2A 56 kDa regulatory subunit epsilon isoform OS=Mus musculus OX=10090 GN=Ppp2r5e PE=1 SV=3	12	5	54.7	415228	2.41124e+06	0.172205
High	Master Protein	O54790	Transcription factor MafG OS=Mus musculus OX=10090 GN=Mafg PE=1 SV=1	20	4	17.9	411181	1.61037e+06	0.255334
High	Master Protein	P97329	Kinesin-like protein KIF20A OS=Mus musculus OX=10090 GN=Kif20a PE=1 SV=1	4	3	99.8	409727	971507	0.421744
High	Master Protein	F6ZQA3	Nuclear mitotic apparatus protein 1 (Fragment) OS=Mus musculus OX=10090 GN=Numa1 PE=1 SV=1	44	39	82.8	409341	1.66135e+06	0.24639
High	Master Protein	Q9Z321	DNA topoisomerase 3-beta-1 OS=Mus musculus OX=10090 GN=Top3b PE=1 SV=1	3	2	96.9	409090	933853	0.438067
High	Master Protein	Q61735	Leukocyte surface antigen CD47 OS=Mus musculus OX=10090 GN=Cd47 PE=1 SV=2	4	2	33.1	408782	694987	0.588186
High	Master Protein	P53395	Lipoamide acyltransferase component of branched-chain alpha-keto acid dehydrogenase complex, mitochondrial OS=Mus musculus OX=10090 GN=Dbt PE=1 SV=2	8	4	53.2	407865	2.54049e+06	0.160546
High	Master Protein	Q9JHC9	ETS-related transcription factor Elf-2 OS=Mus musculus OX=10090 GN=Elf2 PE=1 SV=1	4	2	63.2	404924	957521	0.422888
High	Master Protein	Q8C996	Transmembrane protein 163 OS=Mus musculus OX=10090 GN=Tmem163 PE=1 SV=1	14	4	31.2	404337	1.54109e+06	0.262371
High	Master Protein	Q6NZN0	RNA-binding protein 26 OS=Mus musculus OX=10090 GN=Rbm26 PE=1 SV=2	11	8	114.1	404078	6.93294e+06	0.0582838
High	Master Protein	P54763	Ephrin type-B receptor 2 OS=Mus musculus OX=10090 GN=Ephb2 PE=1 SV=3	5	5	109.8	403914	1.04674e+06	0.385878
High	Master Protein	Q9CXG3	Peptidyl-prolyl cis-trans isomerase-like 4 OS=Mus musculus OX=10090 GN=Ppil4 PE=1 SV=2	6	3	57.2	403430	1.71344e+06	0.23545
High	Master Protein	Q8K1A6	Coiled-coil and C2 domain-containing protein 1A OS=Mus musculus OX=10090 GN=Cc2d1a PE=1 SV=2	2	2	103.6	401209	818849	0.489967
High	Master Protein	A0A0R4J0P6	Poly(A)-specific ribonuclease PARN OS=Mus musculus OX=10090 GN=Parn PE=1 SV=1	3	2	71.5	399440	1.49431e+06	0.267306
High	Master Protein	A0A0R4J0Y3	Probable helicase with zinc finger domain OS=Mus musculus OX=10090 GN=Helz PE=1 SV=1	1	3	219.8	399078	822883	0.484975
High	Master Protein	Q9D7H3	RNA 3'-terminal phosphate cyclase OS=Mus musculus OX=10090 GN=RtcA PE=1 SV=2	3	2	39.2	398114	1115536	0.356881
High	Master Protein	P61620	Protein transport protein Sec61 subunit alpha isoform 1 OS=Mus musculus OX=10090 GN=Sec61a1 PE=1 SV=2	2	2	52.2	397619	1.3174e+06	0.30182
High	Master Protein	Q9QWF0	Chromatin assembly factor 1 subunit A OS=Mus musculus OX=10090 GN=Chaf1a PE=1 SV=1	1	2	101.9	395765	1.05269e+06	0.375956
High	Master Protein	Q3UJU9	Regulator of microtubule dynamics protein 3 OS=Mus musculus OX=10090 GN=Rmdn3 PE=1 SV=2	10	4	52	395752	1.5907e+06	0.248791
High	Master Protein	Q80YQ1	Thrombospondin-1 OS=Mus musculus OX=10090 GN=Thbs1 PE=1 SV=1	2	2	129.6	393900	575994	0.683862
High	Master Protein	Q9CWI3	BRCA2 and CDKN1A-interacting protein OS=Mus musculus OX=10090 GN=Bccip PE=1 SV=1	8	2	35.9	393342	1.26069e+06	0.312006
High	Master Protein	A0A1B0GRA5	Stromal interaction molecule 1 OS=Mus musculus OX=10090 GN=Stim1 PE=1 SV=1	3	3	88.9	392023	1.43857e+06	0.272508
High	Master Protein	Q9CPP6	NADH dehydrogenase [ubiquinone] 1 alpha subcomplex subunit 5 OS=Mus musculus OX=10090 GN=Ndufa5 PE=1 SV=3	23	2	13.4	390955	1.9454e+06	0.200964
High	Master Protein	P12265	Beta-glucuronidase OS=Mus musculus OX=10090 GN=Gusb PE=1 SV=2	6	3	74.1	389162	1.3219e+06	0.294395
High	Master Protein	P06797	Cathepsin L1 OS=Mus musculus OX=10090 GN=Ctsl PE=1 SV=2	11	2	37.5	388793	1.74503e+06	0.2228
High	Master Protein	O08848	60 kDa SS-A/Ro ribonucleoprotein OS=Mus musculus OX=10090 GN=Trove2 PE=1 SV=1	4	3	60.1	388781	1365339	0.284751
High	Master Protein	Q99J99	3-mercaptopyruvate sulfurtransferase OS=Mus musculus OX=10090 GN=Mpst PE=1 SV=4	9	2	33.1	388111	1.56701e+06	0.247677
High	Master Protein	Q9DBL1	Short/branched chain specific acyl-CoA dehydrogenase, mitochondrial OS=Mus musculus OX=10090 GN=Acadsb PE=1 SV=1	9	3	47.8	387362	1.4113e+06	0.274473
High	Master Protein	Q3UMC0	Spermatogenesis-associated protein 5 OS=Mus musculus OX=10090 GN=Spata5 PE=1 SV=2	8	7	97.2	386839	2.03325e+06	0.190256
High	Master Protein	Q9D8S5	MCG7614, isoform CRA_c OS=Mus musculus OX=10090 GN=Srsf5 PE=1 SV=1	14	4	31	386787	4.59048e+06	0.0842586
High	Master Protein	Q91YR5	Methyltransferase-like protein 13 OS=Mus musculus OX=10090 GN=Mettl13 PE=1 SV=1	5	3	78.7	385998	1.07067e+06	0.36052
High	Master Protein	E9PZ26	Bromodomain-containing 1 OS=Mus musculus OX=10090 GN=Brd1 PE=1 SV=1	1	3	133.3	385230	581656	0.662299
High	Master Protein	P62774	Myotrophin OS=Mus musculus OX=10090 GN=Mtpn PE=1 SV=2	14	2	12.9	384518	1.75016e+06	0.219704
High	Master Protein	D3YYC3	Histone-lysine N-methyltransferase OS=Mus musculus OX=10090 GN=Setdb1 PE=1 SV=1	1	2	144.5	382482	2.96636e+06	0.12894
High	Master Protein	Q04690	Neurofibromin OS=Mus musculus OX=10090 GN=Nf1 PE=1 SV=1	3	6	319.4	381911	1.30606e+06	0.292414
High	Master Protein	Q8CH09	SURP and G-patch domain-containing protein 2 OS=Mus musculus OX=10090 GN=Sugp2 PE=1 SV=2	1	3	118	381887	699126	0.546235
High	Master Protein	B1ASU9	Serine/threonine-protein kinase tousled-like 2 OS=Mus musculus OX=10090 GN=Tlk2 PE=1 SV=1	5	4	85.3	381675	1.14896e+06	0.332193
High	Master Protein	Q923A8	Mitogen-activated protein kinase kinase kinase 7 OS=Mus musculus OX=10090 GN=Map3k7 PE=1 SV=1	4	2	67.2	381539	421383	0.905445
High	Master Protein	P49442	Inositol polyphosphate 1-phosphatase OS=Mus musculus OX=10090 GN=Inpp1 PE=1 SV=2	7	2	43.3	379826	1.45292e+06	0.261423
High	Master Protein	A2A841	Protein 4.1 OS=Mus musculus OX=10090 GN=Epb41 PE=1 SV=1	2	2	97.2	378056	839208	0.450492
High	Master Protein	Q8BUI3	Leucine-rich repeat and WD repeat-containing protein 1 OS=Mus musculus OX=10090 GN=LRWD1 PE=2 SV=1	6	4	71.5	377379	1.05982e+06	0.356079
High	Master Protein	A0A140LHG7	Mediator of RNA polymerase II transcription subunit 25 OS=Mus musculus OX=10090 GN=Med25 PE=1 SV=1	2	2	85.3	377334	902466	0.418115
High	Master Protein	Q99K73	Nrf1 protein OS=Mus musculus OX=10090 GN=Nrf1 PE=1 SV=1	5	3	57.2	376257	2.15577e+06	0.174535
High	Master Protein	Q14C51	Pentatricopeptide repeat domain-containing protein 3, mitochondrial OS=Mus musculus OX=10090 GN=Ptcd3 PE=1 SV=2	7	5	77.7	375987	2.37529e+06	0.158291
High	Master Protein	Q64299	Protein NOV homolog OS=Mus musculus OX=10090 GN=Nov PE=1 SV=1	14	4	38.9	375774	719356	0.522375
High	Master Protein	Q9EPC1	Alpha-parvin OS=Mus musculus OX=10090 GN=Parva PE=1 SV=1	15	5	42.3	375456	3.33989e+06	0.112415
High	Master Protein	P36916	Guanine nucleotide-binding protein-like 1 OS=Mus musculus OX=10090 GN=Gnl1 PE=1 SV=4	6	4	68.7	374732	2.21274e+06	0.169352
High	Master Protein	P83917	Chromobox protein homolog 1 OS=Mus musculus OX=10090 GN=Cbx1 PE=1 SV=1	24	4	21.4	374294	2.81464e+06	0.132981
High	Master Protein	Q8CJG0	Protein argonaute-2 OS=Mus musculus OX=10090 GN=Ago2 PE=1 SV=3	4	3	97.2	373720	662143	0.564409
High	Master Protein	G5E8T9	Hydroxyacyl glutathione hydrolase OS=Mus musculus OX=10090 GN=Hagh PE=1 SV=1	3	2	34.1	372566	564358	0.660159
High	Master Protein	Q99JT2	Serine/threonine-protein kinase 26 OS=Mus musculus OX=10090 GN=Stk26 PE=1 SV=1	23	10	46.6	372233	2.53829e+06	0.146648
High	Master Protein	Q9R0E1	Procollagen-lysine,2-oxoglutarate 5-dioxygenase 3 OS=Mus musculus OX=10090 GN=Plod3 PE=1 SV=1	1	2	84.9	370241	721452	0.513189
High	Master Protein	Q924W5	Structural maintenance of chromosomes protein 6 OS=Mus musculus OX=10090 GN=Smc6 PE=1 SV=1	2	2	127.1	370064	626923	0.590286
High	Master Protein	F8WJE0	Deoxynucleoside triphosphate triphosphohydrolase SAMHD1 OS=Mus musculus OX=10090 GN=Samhd1 PE=1 SV=1	5	3	75.8	368633	2.47139e+06	0.14916
High	Master Protein	P22682	E3 ubiquitin-protein ligase CBL OS=Mus musculus OX=10090 GN=Cbl PE=1 SV=3	6	3	100.5	368222	1.42711e+06	0.258019
High	Master Protein	Q8BI72	CDKN2A-interacting protein OS=Mus musculus OX=10090 GN=Cdkn2aip PE=1 SV=1	7	4	59.7	368114	927184	0.397023
High	Master Protein	P63321	Ras-related protein Ral-A OS=Mus musculus OX=10090 GN=Rala PE=1 SV=1	17	4	23.5	367338	1814171	0.202482
High	Master Protein	Q8VCE0	Sodium/potassium-transporting ATPase subunit alpha OS=Mus musculus OX=10090 GN=Atp1a3 PE=1 SV=1	17	34	115.9	365228	1.08054e+06	0.338006
High	Master Protein	A2AEM2	Chloride channel CLIC-like 1, isoform CRA_a OS=Mus musculus OX=10090 GN=Clcc1 PE=1 SV=1	2	2	61.2	364995	545072	0.669627
High	Master Protein	A2A6A1	G patch domain-containing protein 8 OS=Mus musculus OX=10090 GN=Gpatch8 PE=1 SV=1	3	4	164.9	362102	1.34238e+06	0.269747
High	Master Protein	Q9CWZ3	RNA-binding protein 8A OS=Mus musculus OX=10090 GN=Rbm8a PE=1 SV=4	17	3	19.9	361215	2.45316e+06	0.147245
High	Master Protein	Q9EPE9	Manganese-transporting ATPase 13A1 OS=Mus musculus OX=10090 GN=Atp13a1 PE=1 SV=2	2	3	132.3	360196	1.10477e+06	0.326036
High	Master Protein	E9PUR0	Ankyrin repeat and KH domain-containing 1 OS=Mus musculus OX=10090 GN=Ankhd1 PE=1 SV=1	4	7	269.5	357072	2.1071e+06	0.169461
High	Master Protein	A0A0A0MQE5	Calmodulin-regulated spectrin-associated protein 1 OS=Mus musculus OX=10090 GN=Camsap1 PE=1 SV=1	3	3	175.9	353921	699235	0.506155
High	Master Protein	Q2NL51	Glycogen synthase kinase-3 alpha OS=Mus musculus OX=10090 GN=Gsk3a PE=1 SV=2	4	2	51.6	353903	824418	0.429276
[truncated: 454 more rows]
